# Supplementary material for: Plasma cell-free RNA characteristics in COVID-19 patients
Source: HighWire-hosted journal article supplement (doi:10.1101/gr.276175.121), 2022-01-21
Supplement: Supplemental_Table_S1.Xu.xlsx [file Supplemental_Table_S1.Xu.xlsx]

## Sheet: Samples
Table S1. Sample information.
							Infection-related biomarkers				Blood routine						Coagulation function			Quantitation Control
Patients_No	Age	Sex	Sample	Category	Day(s) post admission	Stage	Procalcitonin (PCT; ng/mL; normal range < 0.05)	IL-6 (pg/ml; normal range < 5.3)	TNF-α (pg/ml; normal range < 2.31)	C-reactive protein (mg/dL; normal range < 0.6)	White blood cell count (10⁹/L; normal range 4-10)	Neutrophil count (10⁹/L; normal range 1·8–8.0)	Lymphocyte count (10⁹/L; normal range 0.9-5.2)	Ratio (Neutrophil/Lymphocyte)	Platelet count (10⁹/L; normal range 100–400)	Hemoglobin (g/L; normal range 120–160)	Activated partial thromboplastin time (APTT; s; normal range 28.0–42.8)	Prothrombin time (PT; s; normal range 11.0–14.5)	D-dimer (ng/ml; normal range 68–494)	Library PCR producs concentration(ng/ul)
Mild_15	25	Female	Mild_15_D0209	Mild	1	Early	NA	NA	NA	NA	4.3	2.7	1.1	2.45455	222	98	41.7	13.6	263	16.21
			Mild_15_D0211	Mild	3	Middle	0.08	NA	NA	NA	NA	NA	NA	NA	NA	NA	NA	NA	NA	50.13
			Mild_15_D0214	Mild	6	-	0.05	NA	NA	NA	5.4	2.7	2.1	1.28571	313	101	NA	NA	NA	10.48
			Mild_15_D0217	Mild	9	-	NA	1.93	0.93	NA	4.8	2.4	2	1.2	334	115	NA	NA	NA	41.37
			Mild_15_D0220	Mild	11	Late	NA	1.67	0.79	NA	4.7	2.6	1.7	1.52941	281	112	41.8	12.8	126	29.83
Mild_16	50	Male	Mild_16_D0209	Mild	1	Early	NA	NA	NA	NA	3.9	3	0.5	6	119	105	41	12.7	470	16.22
			Mild_16_D0211	Mild	3	-	NA	30.8	0.66	NA	NA	NA	NA	NA	NA	NA	NA	NA	NA	13.8
			Mild_16_D0214	Mild	6	Middle	NA	NA	NA	NA	NA	1.7	0.8	2.125	151	106	NA	NA	NA	31.8
			Mild_16_D0217	Mild	9	-	NA	5.36	0.67	NA	4.1	2.2	1.1	2	250	82	30.7	12.9	1030	39.6
			Mild_16_D0220	Mild	11	Late	NA	2.62	1.26	NA	4	2.5	0.9	2.77778	332	79	30.8	13.1	1653	28.8
Mild_17	82	Female	Mild_17_D0209	Mild	1	Early	<0.05	15.67	1.49	NA	4.7	3.6	0.7	5.14286	314	110	36.8	13.8	636	36
			Mild_17_D0211	Mild	3	-	NA	NA	NA	NA	NA	NA	NA	NA	NA	NA	NA	NA	NA	28.4
			Mild_17_D0215	Mild	7	Middle	0.1	NA	NA	NA	NA	3.4	1	3.4	308	109	NA	NA	NA	32
			Mild_17_D0217	Mild	9	-	NA	11.75	0.95	NA	5.9	4	1	4	444	101	36.7	13.8	717	23
			Mild_17_D0220	Mild	11	-	NA	NA	NA	NA	4.8	3.1	1	3.1	396	98	37.8	14.3	725	55.2
			Mild_17_D0224	Mild	15	Late	<0.05	NA	NA	NA	7.9	5.2	1.6	3.25	409	106	38.7	14.5	791	36.6
Mild_B1	56	Female	Mild_B1_D0203	Mild	1	-	NA	NA	NA	23.16	6.39	4.64	1.03	4.50485	346	115	24	12.6	400	49.18
			Mild_B1_D0206	Mild	4	-	NA	NA	NA	14.11	8.09	5.77	1.51	3.82119	385	111	23.9	11.3	190	47.07
Mild_B10	77	Male	Mild_B10_D0203	Mild	1	Early	NA	NA	NA	41.4	4.71	2.58	1.4	1.84286	185	134	NA	NA	NA	37.52
			Mild_B10_D0206	Mild	4	Middle	NA	NA	NA	20.82	3.4	1.77	1.16	1.52586	242	127	NA	NA	NA	35.37
			Mild_B10_D0215	Mild	13	Late	NA	NA	NA	2.85	3.08	1.29	1.04	1.24038	267	123	27.1	10.4	400	18.21
Mild_B11	24	Male	Mild_B11_D0206	Mild	1	Early	NA	NA	NA	7.13	5.61	3.38	1.54	2.19481	239	146	NA	NA	NA	22.4
			Mild_B11_D0218	Mild	13	Middle	NA	NA	NA	7.17	5.18	2.9	1.57	1.84713	258	147	30	10.8	270	28.6
			Mild_B11_D0226	Mild	21	Late	NA	NA	NA	1.76	5.93	3.36	1.78	1.88764	304	143	NA	NA	NA	25.8
Mild_B12	28	Male	Mild_B12_D0206	Mild	1	-	NA	NA	NA	0.2	5.2	2.51	2.01	1.24876	180	145	NA	NA	NA	42.41
			Mild_B12_D0226	Mild	21	-	NA	NA	NA	0.08	4.49	2.35	1.58	1.48734	170	136	27	11.5	200	10.27
Mild_B13	27	Female	Mild_B13_D0206	Mild	1	Early		NA	NA	NA	NA	NA	NA	NA	NA	NA	NA	NA	NA	43.68
			Mild_B13_D0215	Mild	10	Middle	NA	NA	NA	0.46	5.14	3.08	1.58	1.94937	233	133	NA	NA	NA	27.62
			Mild_B13_D0218	Mild	13	-	0.14	NA	NA	0.5	8.96	5.26	2.68	1.96269	280	121	26	10.8	0	13.69
			Mild_B13_D0226	Mild	21	Late	0.13	NA	NA	0.62	7.51	3.96	2.55	1.55294	228	117	NA	NA	NA	35.93
Mild_B14	52	Male	Mild_B14_D0215	Mild	1	-	0.03	NA	NA	2.2	5.05	2.92	1.64	1.78049	254	125	NA	NA	NA	35.93
Mild_B15	54	Female	Mild_B15_D0209	Mild	1	Early	NA	NA	NA	4	4.23	2.36	1.5	1.57333	306	113	NA	NA	NA	43.72
			Mild_B15_D0218	Mild	10	Middle	NA	NA	NA	NA	NA	NA	NA	NA	NA	NA	NA	NA	NA	46.08
			Mild_B15_D0221	Mild	13	Late	0.05	NA	NA	1.6	4.55	2.09	2.02	1.03465	265	111	25	9.8	70	14.48
Mild_B16	50	Male	Mild_B16_D0209	Mild	1	-	0.05	NA	NA	27.3	5.65	2.99	2.12	1.41038	212	153	NA	NA	NA	47.54
			Mild_B16_D0215	Mild	7	-	NA	NA	NA	NA	NA	NA	NA	NA	NA	NA	NA	NA	NA	39.22
Mild_B19	65	Male	Mild_B19_D0209	Mild	1	Early	NA	NA	NA	0.9	3.8	1.9	1.5	1.26667	169	132	31.7	13.4	NA	24.88
			Mild_B19_D0211	Mild	3	Middle	NA	NA	NA	0.4	4.17	2.15	1.58	1.36076	184	127	NA	NA	NA	16.93
			Mild_B19_D0215	Mild	6	Late	0.03	2.12	NA	0.4	4.32	2.31	1.52	1.51974	172	129	30	11.4	100	10.05
Mild_B2	56	Male	Mild_B2_D0206	Mild	1	Early	NA	NA	NA	9.58	5.9	3.21	1.69	1.89941	237	140	23.6	10.1	170	32.31
			Mild_B2_D0211	Mild	6	Middle	NA	NA	NA	9.8	5.6	2.81	1.82	1.54396	216	134	NA	NA	NA	27.72
			Mild_B2_D0226	Mild	21	Late	0.1	NA	NA	7.11	5.09	3.07	1.33	2.30827	217	143	31.3	10.8	100	17.48
Mild_B22	62	Female	Mild_B22_D0212	Mild	1	Early	0.03	2	NA	0.4	5.16	2.85	1.94	1.46907	251	122	24.3	10.3	530	38.93
			Mild_B22_D0218	Mild	7	Middle	NA	1.9	NA	0.3	6.44	3.88	1.95	1.98974	272	122	26.6	11	480	42.84
			Mild_B22_D0221	Mild	10	Late	0.08	NA	NA	0.5	5.31	3.3	1.47	2.2449	231	119	27.7	11.3	340	13.99
Mild_B4	24	Male	Mild_B4_D0203	Mild	1	Early	0.18	NA	NA	43.86	7.35	5.6	1.14	4.91228	217	135	NA	NA	NA	27.56
			Mild_B4_D0206	Mild	4	Middle		NA	NA	NA	NA	NA	NA	NA	NA	NA	NA	NA	NA	13.52
			Mild_B4_D0212	Mild	10	Late	NA	NA	NA	1.88	5.1	2.88	1.39	2.07194	271	125	NA	NA	NA	20.02
Mild_B5	35	Male	Mild_B5_D0203	Mild	1	Early	NA	NA	NA	15.67	6.87	3.23	2.51	1.28685	284	141	NA	NA	NA	44.9
			Mild_B5_D0206	Mild	4	Middle	NA	NA	NA	NA	NA	NA	NA	NA	NA	NA	NA	NA	NA	25.88
			Mild_B5_D0212	Mild	10	Late	NA	NA	NA	3.23	6.39	3.38	2.08	1.625	348	131	NA	NA	NA	14.7
Mild_B7	NA	NA	Mild_B7_D0206	Mild	1	-	NA	NA	NA	NA	NA	NA	NA	NA	NA	NA	NA	NA	NA	41.42
Mild_B8	69	Male	Mild_B8_D0203	Mild	4	Early	NA	NA	NA	30.04	4.39	2.71	0.83	3.26506	251	125	NA	NA	NA	43.49
			Mild_B8_D0206	Mild	1	Middle	NA	NA	NA	NA	NA	NA	NA	NA	NA	NA	NA	NA	NA	38.86
			Mild_B8_D0215	Mild	10	Late	NA	NA	NA	1.21	4.12	2	1.36	1.47059	189	137	NA	NA	NA	20.05
Mild_Y2	57	Female	Mild_Y2_D0209	Mild	1	Early	NA	NA	NA	NA	NA	NA	NA	NA	NA	NA	NA	NA	NA	10.53
			Mild_Y2_D0214	Mild	6	-	NA	NA	NA	NA	NA	NA	NA	NA	NA	NA	NA	NA	NA	12.46
			Mild_Y2_D0217	Mild	9	-	NA	NA	NA	NA	NA	NA	NA	NA	NA	NA	NA	NA	NA	46.76
			Mild_Y2_D0220	Mild	12	Middle	NA	NA	NA	NA	NA	NA	NA	NA	NA	NA	NA	NA	NA	44.36
			Mild_Y2_D0224	Mild	16	Late	NA	NA	NA	NA	NA	NA	NA	NA	NA	NA	NA	NA	NA	29.65
Severe_1	78	Male	Severe_1_D0207	Severe	1	-	0.69	NA	NA	NA	12.74	9.54	0.65	14.6769	223	96	38.6	16.5	2992	47.85
Severe_10	72	Male	Severe_10_D0211	Severe	1	Early	0.08	15.04	1.35	12.37	8	6.4	1.2	5.33333	124	75	38	15.3	>10000	30.37
			Severe_10_D0214	Severe	4	-	NA	NA	NA	NA	7.3	6.1	0.6	10.1667	161	64	NA	NA	NA	30.62
			Severe_10_D0217	Severe	7	Middle	NA	23.92	NA	1.54	7.5	6.1	0.6	10.1667	247	77	37	15	7366	39.53
			Severe_10_D0220	Severe	10	-	NA	19.1	NA	NA	6.8	4.5	1.1	4.09091	372	79	39.1	14.8	2745	13.95
			Severe_10_D0223	Severe	13	-	NA	NA	NA	NA	6.8	3.6	1.6	2.25	404	56	NA	NA	NA	15.5
			Severe_10_D0226	Severe	16	Late	NA	18.21	0.38	NA	6.3	4	1.2	3.33333	NA	87	NA	NA	NA	14.85
Severe_11	58	Male	Severe_11_D0211	Severe	1	Early	NA	37.89	NA	6.5	10.1	8.6	0.9	9.55556	165	94	45.8	16.5	3279	49.89
			Severe_11_D0214	Severe	4	-	NA	82.74	0.78	2.48	10	8.6	0.8	10.75	139	101	44.1	16.9	3010	49.96
			Severe_11_D0217	Severe	7	Middle	0.08	41.44	1.17	NA	7.2	5.8	0.6	9.66667	147	86	43.9	16.6	1841	30.82
			Severe_11_D0220	Severe	10	-	0.21	NA	NA	NA	7.8	5.4	1.1	4.90909	181	76	49.5	17.4	802	37.7
			Severe_11_D0223	Severe	13	-	0.15	19.79	NA	2.59	4.5	2.7	0.9	3	206	77	45.6	16.9	1813	39.31
			Severe_11_D0226	Severe	16	Late	0.23	NA	NA	NA	6.3	3.5	1.6	2.1875	210	76	42.9	17	2260	38.18
Severe_12	26	Male	Severe_12_D0214	Severe	1	Early	NA	6.68	1.33	NA	4.8	3.1	1.2	2.58333	174	136	NA	NA	NA	18.25
			Severe_12_D0217	Severe	4	Middle	NA	2.68	0.64	NA	5.8	3.7	1.5	2.46667	146	134	45.1	13.1	355	42.1
			Severe_12_D0220	Severe	7	-	NA	2.78	1.17	NA	5.3	3.3	1.4	2.35714	205	134	44.2	12.9	245	28.55
			Severe_12_D0224	Severe	11	Late	NA	NA	NA	NA	6	3.8	1.6	2.375	123	141	42	13	281	18.41
Severe_13	79	Male	Severe_13_D0211	Severe	1	Early	NA	NA	NA	20.36	6.2	5.4	0.6	9	41	70	69.3	15.1	2291	27.65
			Severe_13_D0214	Severe	4	-	NA	289.44	1.55	18.12	5.9	4.6	0.7	6.57143	64	86	45.4	14.4	5780	31.69
			Severe_13_D0217	Severe	7	-	NA	41.08	NA	22.75	6.7	6.1	0.3	20.3333	131	35	54.7	14.2	4576	35.82
			Severe_13_D0220	Severe	10	-	NA	NA	NA	NA	7	5.9	0.4	14.75	142	70	39.7	14.6	4767	12.28
			Severe_13_D0223	Severe	13	-	NA	841.76	0.79	NA	6.6	5.1	0.4	12.75	226	75	43.1	14.8	3472	40.77
			Severe_13.p24_D0224	Severe	14	-	NA	NA	NA	NA	NA	NA	NA	NA	NA	NA	NA	NA	NA	39.23
			Severe_13.p23_D0224	Severe	14	Middle	NA	NA	NA	NA	NA	NA	NA	NA	NA	NA	NA	NA	NA	44.09
			Severe_13_D0226	Severe	16	Late	NA	NA	NA	NA	NA	NA	NA	NA	NA	NA	NA	NA	NA	42.98
Severe_14	72	Female	Severe_14_D0211	Severe	1	Early	0.29	797.72	1.87	19.3	8.2	7.8	0.3	26	117	87	46.7	18.1	>10000	39.05
			Severe_14_D0214	Severe	4	-	0.12	107.96	1.36	NA	10.2	9.8	0.2	49	84	73	40.9	17.9	>10000	39.07
			Severe_14_D0217	Severe	7	Middle	0.07	103.97	0.56	4.04	9.3	8.5	0.4	21.25	114	88	45.4	15.8	>10000	40.94
			Severe_14_D0220	Severe	10	-	NA	74.07	0.82	13.25	10.1	9.8	0.2	49	152	82	47.4	15.6	4699	43.55
			Severe_14_D0223	Severe	13	-	<0.05	138.38	0.34	7.4	7.4	6.2	0.7	8.85714	163	78	49.8	15.8	4722	23.14
			Severe_14_D0226	Severe	16	Late	<0.05	89.96	0.82	6.89	6.5	5.6	0.6	9.33333	153	80	46.8	16.2	3964	42.08
Severe_18	55	Female	Severe_18_D0217	Severe	1	Early	0.16	86.05	0.79	2.72	10.4	9	0.9	10	206	81	40.2	24.6	1793	24.72
			Severe_18_D0220	Severe	4	Middle	NA	67.85	0.87	10.39	7.7	6.1	0.8	7.625	177	85	34	13.4	3791	26.95
			Severe_18_D0223	Severe	7	-	<0.05	22.26	0.43	8.27	8.6	6	0.9	6.66667	232	85	38.9	13.4	4104	23.15
			Severe_18_D0226	Severe	10	Late	<0.05	21.35	0.64	5.32	11.2	8.2	1.2	6.83333	265	86	40.5	14.5	3749	42.7
Severe_19	41	Male	Severe_19_D0217	Severe	1	Early	NA	69.99	0.49	5.05	9.8	8.2	0.8	10.25	198	127	32.9	12.3	NA	42.78
			Severe_19_D0220	Severe	4	Middle	NA	60.06	0.8	6.9	3.7	2.6	0.6	4.33333	236	119	NA	NA	NA	41.16
			Severe_19_D0223	Severe	7	-	NA	NA	NA	NA	20.7	19.6	0.6	32.6667	360	113	NA	NA	NA	40.47
			Severe_19_D0226	Severe	10	Late	NA	NA	NA	NA	5.1	3.8	0.7	5.42857	351	104	NA	NA	NA	34.47
Severe_20	66	Male	Severe_20_D0217	Severe	1	Early	0.13	490.77	0.83	8.12	7.3	6.8	0.3	22.6667	131	83	44.2	16.4	2947	42.63
			Severe_20_D0220	Severe	4	Middle	0.08	762.23	NA	7.03	11	9.6	0.8	12	195	76	47.1	16.3	2672	40.19
			Severe_20_D0223	Severe	7	-	0.1	373.49	0.42	6.03	12.8	12	0.3	40	236	78	49.4	16.1	3874	20.65
			Severe_20_D0226	Severe	10	Late	0.08	465.31	0.45	8.37	16	14.6	0.8	18.25	247	92	51.3	15.9	8095	41.83
Severe_3	64	Male	Severe_3_D0214	Severe	1	Early	NA	NA	NA	NA	6.9	4.7	1	4.7	309	85	NA	NA	NA	51.04
			Severe_3_D0217	Severe	4	Middle	NA	8.27	1.36	NA	5.9	3.4	1.4	2.42857	300	87	NA	NA	NA	42.58
			Severe_3_D0220	Severe	7	-	NA	4.73	1.04	0.25	NA	NA	NA	NA	NA	NA	NA	NA	NA	39.14
			Severe_3_D0226	Severe	10	Late	NA	5.37	0.6	0.28	NA	NA	NA	NA	NA	NA	NA	NA	NA	13.17
Severe_4	49	Male	Severe_4_D0130	Severe	1	Early	0.07	22.16	1.56	NA	17.5	16.2	0.5	32.4	105	133	36.7	12.8	4146	11.6
			Severe_4_D0208	Severe	36	-	0.22	NA	NA	8.99	12	9.3	1.3	7.15385	250	95	47.4	14.9	>10000	15.67
			Severe_4_D0211	Severe	39	Middle	NA	NA	NA	4.08	11.2	7.8	1.6	4.875	268	94	42.9	14.6	>10000	29.4
			Severe_4_D0214	Severe	42	-	NA	27.26	0.75	2.04	10.1	6.6	1.8	3.66667	291	111	38.6	15.5	>10000	22.6
			Severe_4_D0217	Severe	45	-	NA	17.24	1.11	1.41	10.3	6.7	2.2	3.04545	408	106	39.2	14.4	6489	42.8
			Severe_4_D0220	Severe	48	Late	NA	NA	NA	0.74	7.7	4.9	1.7	2.88235	390	111	35.9	15.1	6032	25.94
Severe_5	60	Male	Severe_5_D0207	Severe	1	-	NA	NA	NA	NA	NA	NA	NA	NA	NA	NA	NA	NA	NA	39.6
Severe_6	49	Male	Severe_6_D0205	Severe	1	Early	NA	32.78	1.92	NA	7.4	6.4	0.6	10.6667	250	108	43.2	14.8	4735	17.68
			Severe_6_D0208	Severe	4	-	NA	10.34	1.2	12.75	9.7	9	0.4	22.5	272	72	41.1	15.6	4470	21.84
			Severe_6_D0211	Severe	7	-	NA	NA	NA	12.17	18.9	17.5	0.6	29.1667	267	56	42.7	15.4	3337	25.2
			Severe_6_D0214	Severe	10	-	NA	109.36	NA	19.27	8.6	7.2	0.8	9	206	74	55.8	17.5	2917	31.4
			Severe_6_D0217	Severe	13	Middle	NA	NA	NA	16.27	5.2	4.3	0.5	8.6	280	99	45.5	15.6	2382	32.2
			Severe_6_D0220	Severe	16	-	NA	NA	NA	NA	7.5	6.1	0.9	6.77778	372	75	48.2	15.7	2307	32.8
			Severe_6_D0226	Severe	22	Late	NA	24.17	0.42	NA	4.9	3.8	0.8	4.75	291	72	56.9	17	1241	48.6
Severe_7	53	Male	Severe_7_D0205	Severe	1	Early	<0.05	47.37	1.57	12.06	5.9	4.1	0.8	5.125	220	152	51.2	14.3	372	18.54
			Severe_7_D0208	Severe	4	-	<0.05	6.89	NA	3.83	4.2	3.1	0.5	6.2	260	127	44.1	13.5	740	14.56
			Severe_7_D0211	Severe	7	-	NA	2.6	1.28	0.89	5.6	3.8	1.2	3.16667	248	123	44.2	14	420	38.4
			Severe_7_D0214	Severe	10	Middle	NA	NA	NA	NA	4.2	2.8	1.2	2.33333	213	124	NA	NA	NA	26.2
			Severe_7_D0217	Severe	13	-	<0.05	3.17	1.41	NA	4.2	2.2	1.2	1.83333	184	124	NA	NA	NA	31.8
			Severe_7_D0220	Severe	16	-	NA	3.2	0.98	NA	4.2	2.3	1.3	1.76923	156	121	NA	NA	NA	32
			Severe_7_D0226	Severe	22	Late	NA	NA	NA	NA	3.1	1.5	1.1	1.36364	122	126	42.6	14	NA	15.2
Severe_8	61	Male	Severe_8_D0211	Severe	1	Early	0.14	3.99	1.45	6.56	5.3	4.3	0.5	8.6	122	74	42.9	17.4	4494	45.77
			Severe_8_D0214	Severe	4	-	0.11	NA	NA	6.47	5.6	4.1	0.7	5.85714	161	82	44.4	16.9	7350	47.52
			Severe_8_D0217	Severe	7	-	NA	1.74	1.93	1.77	6.1	4.4	0.8	5.5	145	86	40.5	14.8	4199	42.04
			Severe_8_D0220	Severe	10	Middle	0.15	2.89	0.69	1.46	5	3.5	0.9	3.88889	209	80	46.5	14.9	3865	41.72
			Severe_8_D0223	Severe	13	-	NA	2.09	0.75	1.23	7.6	5.5	1	5.5	233	88	51.1	14.8	3027	24.6
			Severe_8_D0226	Severe	16	Late	0.26	3.38	0.95	2.28	9.3	7.3	0.8	9.125	171	91	43.8	15.6	4727	19.07
Severe_9	42	Male	Severe_9_D0211	Severe	1	Early	NA	NA	NA	NA	NA	NA	NA	NA	NA	NA	NA	NA	NA	45.64
			Severe_9_D0214	Severe	4	-	NA	NA	NA	NA	NA	NA	NA	NA	NA	NA	NA	NA	NA	36.05
			Severe_9_D0217	Severe	7	Middle	NA	NA	NA	NA	NA	NA	NA	NA	NA	NA	NA	NA	NA	29.5
			Severe_9_D0220	Severe	10	-	NA	NA	NA	NA	NA	NA	NA	NA	NA	NA	NA	NA	NA	30.31
			Severe_9_D0224	Severe	14	Late	NA	NA	NA	NA	NA	NA	NA	NA	NA	NA	NA	NA	NA	35.49
Severe_B3	63	Male	Severe_B3_D0203	Severe	1	Early	NA	NA	NA	23.35	7.69	6.92	0.35	19.7714	156	114	21.1	10.7	0.47	20.67
			Severe_B3_D0206	Severe	4	Middle	NA	NA	NA	NA	6.99	6.08	0.42	14.4762	142	114	NA	NA	NA	10.21
			Severe_B3_D0211	Severe	9	-	0.1	NA	NA	89.18	7.92	6.62	0.62	10.6774	179	96	NA	NA	NA	13.74
			Severe_B3_D0226	Severe	14	Late	0.11	NA	NA	3.42	5.69	3.28	1.2	2.73333	206	100	NA	NA	NA	18.61
Severe_B9	60	Female	Severe_B9_D0203	Severe	1	Early	NA	NA	NA	NA	NA	NA	NA	NA	NA	NA	NA	NA	NA	49.63
			Severe_B9_D0206	Severe	4	-	NA	NA	NA	NA	11.5	10.04	0.92	10.913	302	94	NA	NA	NA	32.7
			Severe_B9_D0215	Severe	13	Middle	NA	NA	NA	8.75	7.11	4.86	1.36	3.57353	224	107	27	11.1	2.13	15.38
			Severe_B9_D0218	Severe	16	-	NA	NA	NA	3.84	4.44	2.48	1.15	2.15652	195	107	NA	NA	NA	13.11
			Severe_B9_D0226	Severe	24	Late	0.1	NA	NA	1.29	5.57	2.93	1.74	1.68391	242	100	NA	NA	NA	24.28
R2005001609_RNA1	46	Male	D2006014044	Healthy	-	-	NA	NA	NA	NA	NA	NA	NA	NA	NA	NA	NA	NA	NA	20.6
R2005001610_RNA2	46	Male	D2006014045	Healthy	-	-	NA	NA	NA	NA	NA	NA	NA	NA	NA	NA	NA	NA	NA	51.2
R2005001611_RNA3	49	Male	D2006014046	Healthy	-	-	NA	NA	NA	NA	NA	NA	NA	NA	NA	NA	NA	NA	NA	64.4
R2005001612_RNA4	56	Male	D2006014047	Healthy	-	-	NA	NA	NA	NA	NA	NA	NA	NA	NA	NA	NA	NA	NA	57.8
R2005001613_RNA5	36	Male	D2006014048	Healthy	-	-	NA	NA	NA	NA	NA	NA	NA	NA	NA	NA	NA	NA	NA	44.2
R2005001614_RNA6	47	Female	D2006014049	Healthy	-	-	NA	NA	NA	NA	NA	NA	NA	NA	NA	NA	NA	NA	NA	71.8
R2005001615_RNA8	34	Male	D2006014051	Healthy	-	-	NA	NA	NA	NA	NA	NA	NA	NA	NA	NA	NA	NA	NA	42.6
R2005001622_RNA7	52	Male	D2006014050	Healthy	-	-	NA	NA	NA	NA	NA	NA	NA	NA	NA	NA	NA	NA	NA	37
