# Supplementary material for: Plasma cell-free RNA characteristics in COVID-19 patients
Source: HighWire-hosted journal article supplement (doi:10.1101/gr.276175.121), 2022-01-21
Supplement: Supplemental_Table_S2.xlsx [file Supplemental_Table_S2.xlsx]

## Sheet: Table S2
Table S2. The 380 up-regulated and 117 down-regulated genes in COVID-19 patients.
Gene ID	Category	Symbol	Type	Mean.TPM_Control	Mean.TPM_Mild	Mean.TPM_Severe
728481	pseudogene	RPL23AP21	Mild&Severe_up	0.487612	1.5402	19.9746
100189048	tRNA	TRW-CCA3-2	Mild&Severe_up	3.52774	8.08504	8.67583
100189436	tRNA	TRW-CCA3-1	Mild&Severe_up	4.24256	9.28252	9.96929
9935	protein_coding	MAFB	Mild&Severe_up	1.07626	12.2095	20.7232
100313824	miRNA	MIR663B	Mild&Severe_up	0.037739	9.13023	9.84961
100189123	tRNA	TRW-CCA1-1	Mild&Severe_up	2.66496	8.47613	8.21175
26864	snRNA	RNVU1-7	Mild&Severe_up	67.0164	484.95	591.19
106631777	rRNA	RNA45SN1	Mild&Severe_up	0.17389	7.61907	9.18828
100189283	tRNA	TRV-TAC2-1	Mild&Severe_up	65.7223	175.398	211.888
106481641	pseudogene	RNU2-23P	Mild&Severe_up	73.4291	480.664	584.096
106480412	pseudogene	RNU1-89P	Mild&Severe_up	2.41924	25.6093	25.6124
100189228	tRNA	TRV-CAC5-1	Mild&Severe_up	3.15929	19.4606	17.4244
100189416	tRNA	TRV-CAC3-1	Mild&Severe_up	547.194	1685.1	1597.3
103504728	miRNA	MIR3687-2	Mild&Severe_up	0.102016	3.32296	6.46625
100049614	tRNA	TRV-CAC1-5	Mild&Severe_up	23.771	127.038	111.777
109864279	rRNA	RNA45SN2	Mild&Severe_up	0.470047	7.35057	8.67159
791232	tRNA	TRV-CAC1-3	Mild&Severe_up	0.604001	3.58234	2.89969
109910379	rRNA	RNA45SN3	Mild&Severe_up	0.631649	7.84893	9.07746
26869	snRNA	RNU1-3	Mild&Severe_up	112.49	528.144	684.934
4792	protein_coding	NFKBIA	Mild&Severe_up	1.05541	10.5787	11.4069
26871	snRNA	RNU1-1	Mild&Severe_up	112.89	536.182	685.413
26863	snRNA	RNVU1-18	Mild&Severe_up	113.343	536.074	676.291
106635536	pseudogene	RN7SKP176	Mild&Severe_up	1.45349	9.6737	13.4988
100189373	tRNA	TRV-CAC1-1	Mild&Severe_up	1.03268	7.95423	6.2514
100189014	tRNA	TRV-AAC5-1	Mild&Severe_up	1.02516	5.07102	4.00257
100189161	tRNA	TRV-AAC4-1	Mild&Severe_up	35.0259	261.956	209.351
107048985	pseudogene	RNU4-46P	Mild&Severe_up	0.13969	2.45008	5.61557
791231	tRNA	TRV-AAC3-1	Mild&Severe_up	33.3688	259.929	201.386
100188992	tRNA	TRV-AAC2-1	Mild&Severe_up	537.795	1513.8	1686.74
10410	protein_coding	IFITM3	Mild&Severe_up	6.58256	32.679	41.937
791230	tRNA	TRV-AAC1-5	Mild&Severe_up	35.6047	276.574	208.296
7239	tRNA	TRV-AAC1-4	Mild&Severe_up	35.55	266.587	207.979
7241	tRNA	TRV-AAC1-3	Mild&Severe_up	1.89234	8.69816	7.76547
100188990	tRNA	TRV-AAC1-2	Mild&Severe_up	2.09852	8.92692	7.78411
100189263	tRNA	TRT-TGT5-1	Mild&Severe_up	0.258317	3.25345	2.06099
100189419	tRNA	TRT-TGT4-1	Mild&Severe_up	1.37753	12.4945	8.66733
100189378	tRNA	TRT-TGT2-1	Mild&Severe_up	0.522503	5.70869	4.02534
100189245	tRNA	TRT-CGT4-1	Mild&Severe_up	69.371	487.71	364.651
106635684	snoRNA	SNORD141B	Mild&Severe_up	0.252568	2.81486	5.2447
100189360	tRNA	TRT-CGT3-1	Mild&Severe_up	0.680964	6.78165	5.02978
780853	snoRNA	SNORD3C	Mild&Severe_up	54.8707	290.342	272.874
100189086	tRNA	TRT-CGT2-1	Mild&Severe_up	75.3063	420.368	294.421
780851	snoRNA	SNORD3A	Mild&Severe_up	333.297	1484.97	1565.6
100189143	tRNA	TRT-AGT6-1	Mild&Severe_up	0.366125	4.54085	2.34062
100189438	tRNA	TRT-AGT5-1	Mild&Severe_up	1.46202	15.5375	9.54762
100189340	tRNA	TRT-AGT2-2	Mild&Severe_up	0.673212	6.4199	5.05318
3429	protein_coding	IFI27	Mild&Severe_up	0.216327	16.1504	4.59926
100189319	tRNA	TRT-AGT2-1	Mild&Severe_up	1.01308	6.79914	5.24978
100189006	tRNA	TRT-AGT1-3	Mild&Severe_up	1.63794	19.1934	11.3594
100189222	tRNA	TRT-AGT1-2	Mild&Severe_up	1.01476	18.2513	9.99932
106480039	pseudogene	RNU6-1077P	Mild&Severe_up	0.0353503	2.97115	3.73158
595100	snoRNA	SNORD18C	Mild&Severe_up	8.86725	36.5292	43.927
100189187	tRNA	TRT-AGT1-1	Mild&Severe_up	2.81504	25.5216	18.196
23540	tRNA	TRS-TGA4-1	Mild&Severe_up	0.148122	0.872291	2.30881
94017	tRNA	TRS-TGA2-1	Mild&Severe_up	0.567981	4.84155	10.5857
100189279	tRNA	TRS-TGA1-1	Mild&Severe_up	0.147287	1.72741	1.85775
100189218	tRNA	TRS-GCT6-1	Mild&Severe_up	2.24192	23.3135	27.1791
100189229	tRNA	TRS-GCT4-2	Mild&Severe_up	0.180493	1.20714	1.47715
100189225	tRNA	TRS-GCT4-1	Mild&Severe_up	0.325037	2.04337	2.41234
107986852	lncRNA	LOC107986852	Mild&Severe_up	38.7055	171.899	163.493
100189285	tRNA	TRS-GCT3-1	Mild&Severe_up	11.6343	189.059	200.432
100189152	tRNA	TRS-CGA4-1	Mild&Severe_up	1.49907	15.6071	15.8555
100189037	tRNA	TRS-CGA1-1	Mild&Severe_up	0.406228	1.58938	2.17636
100189248	tRNA	TRS-AGA2-5	Mild&Severe_up	0.0348484	0.922279	0.75965
100189352	tRNA	TRS-AGA1-1	Mild&Severe_up	0.684024	8.06728	13.8815
100189012	tRNA	TRR-TCT5-1	Mild&Severe_up	0.128465	3.62846	7.49624
100189115	tRNA	TRR-TCT3-2	Mild&Severe_up	0.116815	7.41073	6.58388
1848	protein_coding	DUSP6	Mild&Severe_up	4.44166	18.2837	20.3426
280661	pseudogene	EIF1AXP1	Mild&Severe_up	2.30928	5.61067	11.944
100189109	tRNA	TRR-TCT3-1	Mild&Severe_up	1.16114	15.6336	17.6771
7230	tRNA	TRR-TCT2-1	Mild&Severe_up	0.663961	9.94037	9.22563
100189133	tRNA	TRR-TCT1-1	Mild&Severe_up	123.31	1937.93	1239.96
7128	protein_coding	TNFAIP3	Mild&Severe_up	0.499264	3.69969	4.77558
100189034	tRNA	TRR-TCG5-1	Mild&Severe_up	5.64204	98.5434	133.938
100189371	tRNA	TRR-TCG3-1	Mild&Severe_up	4.30098	17.7107	24.0434
9314	protein_coding	KLF4	Mild&Severe_up	0.67663	5.53675	5.20288
107986209	pseudogene	LOC107986209	Mild&Severe_up	2.75526	6.63491	12.7712
100189410	tRNA	TRR-TCG2-1	Mild&Severe_up	0.246548	1.26801	1.34089
100189264	tRNA	TRR-TCG1-1	Mild&Severe_up	6.58893	40.2307	33.7814
654322	snoRNA	SNORA13	Mild&Severe_up	9.68035	31.9713	37.0374
109864281	rRNA	RNA5-8SN2	Mild&Severe_up	1.71987	5.86512	8.66073
100887744	pseudogene	RNU6-48P	Mild&Severe_up	0.378858	4.46044	3.84849
3576	protein_coding	CXCL8	Mild&Severe_up	0.893316	3.35323	5.60095
9550	protein_coding	ATP6V1G1	Mild&Severe_up	9.54247	16.5479	35.0731
105374985	lncRNA	LOC105374985	Mild&Severe_up	5.9647	21.3614	22.2252
100189173	tRNA	TRR-CCG1-3	Mild&Severe_up	7.23496	35.6861	30.933
100189084	tRNA	TRR-CCG1-2	Mild&Severe_up	6.86845	52.9805	49.9492
106632264	rRNA	RNA28SN1	Mild&Severe_up	1.11767	4.8889	5.95756
100189365	tRNA	TRR-CCG1-1	Mild&Severe_up	32.958	480.198	547.885
100189428	tRNA	TRR-ACG2-4	Mild&Severe_up	6.09976	319.81	209.982
100189099	tRNA	TRR-ACG2-3	Mild&Severe_up	0.321929	2.55895	2.43395
10577	protein_coding	NPC2	Mild&Severe_up	17.4912	36.0936	57.6635
27018	protein_coding	BEX3	Mild&Severe_up	62.1864	100.642	197.446
100189167	tRNA	TRR-ACG2-2	Mild&Severe_up	0.829057	27.7878	18.5862
100189103	tRNA	TRR-ACG2-1	Mild&Severe_up	18.3887	320.05	219.373
100130561	pseudogene	HMGB1P10	Mild&Severe_up	29.4646	54.4228	93.1709
100189243	tRNA	TRR-ACG1-3	Mild&Severe_up	0.376378	4.81245	3.19072
23099	protein_coding	ZBTB43	Mild&Severe_up	0.385602	2.09523	3.26488
7231	tRNA	TRR-ACG1-2	Mild&Severe_up	0.6206	5.34505	3.31039
100189396	tRNA	TRR-ACG1-1	Mild&Severe_up	0.815958	10.183	6.55598
100189074	tRNA	TRQ-TTG3-3	Mild&Severe_up	6.97132	27.0771	28.6139
100189185	tRNA	TRQ-TTG3-2	Mild&Severe_up	6.69949	26.4706	32.0979
100189321	tRNA	TRQ-TTG3-1	Mild&Severe_up	6.47553	27.3959	28.0715
7229	tRNA	TRQ-TTG1-1	Mild&Severe_up	4.88127	24.5931	26.5186
100189268	tRNA	TRQ-CTG2-1	Mild&Severe_up	2.34316	9.66842	7.48863
106481389	pseudogene	RNU6-657P	Mild&Severe_up	0.0753507	1.80114	2.13351
10209	protein_coding	EIF1	Mild&Severe_up	170.981	278.609	493.698
10673	protein_coding	TNFSF13B	Mild&Severe_up	4.51215	11.4616	14.7353
100189189	tRNA	TRQ-CTG1-2	Mild&Severe_up	3.88814	11.225	9.04503
26469	protein_coding	PTPN18	Mild&Severe_up	5.04024	13.6039	15.8562
9446	protein_coding	GSTO1	Mild&Severe_up	28.595	44.681	81.0862
106480704	pseudogene	RNU6-25P	Mild&Severe_up	1.63066	5.06221	6.25192
1964	protein_coding	EIF1AX	Mild&Severe_up	3.12369	6.18276	10.2946
4501	protein_coding	MT1X	Mild&Severe_up	0.933741	2.32095	4.21916
3949	protein_coding	LDLR	Mild&Severe_up	0.235459	1.23175	2.30153
9308	protein_coding	CD83	Mild&Severe_up	0.322645	3.08802	2.51231
5996	protein_coding	RGS1	Mild&Severe_up	0.061162	1.57949	1.81463
8553	protein_coding	BHLHE40	Mild&Severe_up	0.505601	2.12988	2.99013
109910382	rRNA	RNA28SN3	Mild&Severe_up	0.903469	3.44128	4.03298
415116	protein_coding	PIM3	Mild&Severe_up	0.310868	2.13413	2.39753
6030	pseudogene	RN7SL4P	Mild&Severe_up	2651.45	5160.84	6873.32
283345	transcribed_pseudogene	RPL13P5	Mild&Severe_up	0.357216	1.39268	2.51645
7218	tRNA	TRP-AGG2-6	Mild&Severe_up	3.10943	22.8845	20.6859
400073	protein_coding	C12orf76	Mild&Severe_up	21.8174	36.4909	57.4755
100189127	tRNA	TRN-GTT3-2	Mild&Severe_up	1.23468	5.5947	4.24247
100189176	tRNA	TRN-GTT2-5	Mild&Severe_up	2.12591	9.66131	7.01858
109864282	rRNA	RNA28SN2	Mild&Severe_up	1.11605	3.94831	4.17644
100189036	tRNA	TRN-GTT2-4	Mild&Severe_up	0.459356	1.88003	1.5657
100189083	tRNA	TRN-GTT2-3	Mild&Severe_up	2.78842	11.0485	8.71723
100189402	tRNA	TRN-GTT2-2	Mild&Severe_up	0.295373	1.39869	1.14385
6063	snRNA	RNVU1-11	Mild&Severe_up	0.288131	3.29748	2.10236
85403	protein_coding	EAF1	Mild&Severe_up	0.828836	2.2244	3.39587
8365	protein_coding	HIST1H4H	Mild&Severe_up	7.70909	22.4444	19.8239
7214	tRNA	TRN-GTT2-1	Mild&Severe_up	14.1473	56.9255	45.4771
107985749	tRNA	TRNAV-CAC	Mild&Severe_up	3.33838	21.0037	18.8598
107985614	tRNA	TRNAV-CAC	Mild&Severe_up	6.9986	21.9278	20.5476
51278	protein_coding	IER5	Mild&Severe_up	0.786372	3.10427	3.13196
107986683	tRNA	TRNAI-AAU	Mild&Severe_up	0.581628	9.40263	3.76496
106480663	pseudogene	RNU1-46P	Mild&Severe_up	0.330659	1.5904	2.03999
58155	protein_coding	PTBP2	Mild&Severe_up	0.876139	3.01525	3.26798
4061	protein_coding	LY6E	Mild&Severe_up	0.984463	4.66669	3.50984
107986679	tRNA	TRNAI-AAU	Mild&Severe_up	0.622741	7.49449	3.73491
10105	protein_coding	PPIF	Mild&Severe_up	4.42957	7.70362	11.1295
8848	protein_coding	TSC22D1	Mild&Severe_up	145.635	265.582	324.715
103504731	miRNA	MIR3648-2	Mild&Severe_up	0.116689	0.943026	1.47269
56670	protein_coding	SUCNR1	Mild&Severe_up	1.08563	2.37711	3.54824
7071	protein_coding	KLF10	Mild&Severe_up	0.875567	4.0939	3.0154
107985758	tRNA	TRNAE-UUC	Mild&Severe_up	7.06292	18.8858	21.3264
5366	protein_coding	PMAIP1	Mild&Severe_up	0.426005	2.23687	2.04157
55788	protein_coding	LMBRD1	Mild&Severe_up	5.71794	9.12846	13.2018
106479639	pseudogene	RNU6-164P	Mild&Severe_up	0.0694732	0.97535	1.25879
106480540	pseudogene	RNU6ATAC10P	Mild&Severe_up	0.0467856	2.04192	1.20761
969	protein_coding	CD69	Mild&Severe_up	1.16438	5.5625	3.54472
22836	protein_coding	RHOBTB3	Mild&Severe_up	2.13988	3.75092	5.58763
100189226	tRNA	TRM-CAT6-1	Mild&Severe_up	36.9106	159.312	137.425
100189391	tRNA	TRM-CAT4-3	Mild&Severe_up	0.172903	1.15028	1.44392
106479408	pseudogene	RN7SL507P	Mild&Severe_up	4.65245	8.56607	10.7507
9452	protein_coding	ITM2A	Mild&Severe_up	2.70416	4.60366	6.64529
100189111	tRNA	TRM-CAT3-2	Mild&Severe_up	11.4763	26.3177	35.119
106479282	pseudogene	RN7SL166P	Mild&Severe_up	0.437335	1.52286	1.89937
9519	protein_coding	TBPL1	Mild&Severe_up	6.43879	15.4685	13.8711
100189201	tRNA	TRM-CAT1-1	Mild&Severe_up	40.7338	82.2542	71.0856
10289	protein_coding	EIF1B	Mild&Severe_up	7.49412	11.9739	15.5687
51371	protein_coding	POMP	Mild&Severe_up	2.84723	5.36186	6.50239
106481093	pseudogene	RN7SL627P	Mild&Severe_up	0.125879	0.836188	1.17524
106481221	pseudogene	RNU6-140P	Mild&Severe_up	0.020227	0.593835	0.928209
56925	protein_coding	LXN	Mild&Severe_up	0.641901	2.41139	2.09656
129607	protein_coding	CMPK2	Mild&Severe_up	0.287366	1.88451	1.40119
51185	protein_coding	CRBN	Mild&Severe_up	6.80314	12.7564	13.3804
100189151	tRNA	TRL-TAG2-1	Mild&Severe_up	3.45786	11.5159	9.56787
3725	protein_coding	JUN	Mild&Severe_up	0.156425	2.43015	1.05505
57691	protein_coding	KIAA1586	Mild&Severe_up	1.42429	4.03086	3.29782
2354	protein_coding	FOSB	Mild&Severe_up	0.101669	1.43339	0.95111
6322	protein_coding	SCML1	Mild&Severe_up	0.186352	0.829979	1.09434
100189130	tRNA	TRL-CAG2-1	Mild&Severe_up	2.38227	15.3466	16.0055
100189237	tRNA	TRL-CAA1-2	Mild&Severe_up	0.0968531	1.48525	1.55143
100189291	tRNA	TRL-AAG2-4	Mild&Severe_up	3.45841	15.7769	17.1702
106479464	pseudogene	RN7SL664P	Mild&Severe_up	3.46163	7.90142	6.55097
100533955	lncRNA	SENP3-EIF4A1	Mild&Severe_up	0.0597435	0.694107	0.783764
100529239	protein_coding	RPS10-NUDT3	Mild&Severe_up	0	0.767144	0.677614
7207	tRNA	TRL-AAG2-3	Mild&Severe_up	1.83233	11.7818	13.3267
64651	protein_coding	CSRNP1	Mild&Severe_up	0.200752	1.18608	1.00205
387522	protein_coding	TMEM189-UBE2V1	Mild&Severe_up	0.0170999	0.862861	0.695051
100189202	tRNA	TRL-AAG2-2	Mild&Severe_up	3.34827	17.6033	18.954
100529097	protein_coding	RPL36A-HNRNPH2	Mild&Severe_up	0.342634	1.34009	1.20451
4929	protein_coding	NR4A2	Mild&Severe_up	0.117381	0.762477	0.788159
100129086	pseudogene	HIGD1AP1	Mild&Severe_up	0.905108	1.91433	2.04374
8548	protein_coding	BLZF1	Mild&Severe_up	2.06404	5.99871	3.83902
100189328	tRNA	TRL-AAG2-1	Mild&Severe_up	1.87251	10.5007	12.2975
100189004	tRNA	TRL-AAG1-3	Mild&Severe_up	1.53579	3.65205	4.02589
100189362	tRNA	TRL-AAG1-1	Mild&Severe_up	1.54815	3.97075	4.197
100189282	tRNA	TRK-CTT2-5	Mild&Severe_up	5.67331	15.4938	19.6241
100189110	tRNA	TRK-CTT2-4	Mild&Severe_up	14.8268	73.0637	104.536
790966	tRNA	TRK-CTT2-3	Mild&Severe_up	17.8971	44.2636	59.6788
100189198	tRNA	TRK-CTT2-1	Mild&Severe_up	13.6952	70.7858	103.142
100189107	tRNA	TRK-CTT1-1	Mild&Severe_up	296.127	528.469	546.253
100189265	tRNA	TRI-TAT2-1	Mild&Severe_up	0.446119	5.76547	8.86218
100189095	tRNA	TRI-AAT8-1	Mild&Severe_up	1.77761	15.9423	8.44608
100189401	tRNA	TRI-AAT7-2	Mild&Severe_up	7.69746	71.6391	45.644
100189372	tRNA	TRI-AAT6-1	Mild&Severe_up	0.0814343	2.26058	0.637284
100189310	tRNA	TRI-AAT5-3	Mild&Severe_up	7.62675	66.1519	42.9468
100189336	tRNA	TRI-AAT5-2	Mild&Severe_up	8.0636	77.1721	48.2088
100189153	tRNA	TRI-AAT5-1	Mild&Severe_up	0.330082	2.8954	2.04003
100189393	tRNA	TRI-AAT4-1	Mild&Severe_up	2.0819	25.2064	17.172
100189213	tRNA	TRI-AAT3-1	Mild&Severe_up	1.19435	9.94959	8.36144
100189071	tRNA	TRI-AAT2-1	Mild&Severe_up	1.75612	8.03584	8.98603
100189065	tRNA	TRH-GTG1-9	Mild&Severe_up	38.2478	61.9492	88.9348
100188987	tRNA	TRH-GTG1-5	Mild&Severe_up	40.4087	75.5182	100.783
100188991	tRNA	TRH-GTG1-1	Mild&Severe_up	38.6668	58.5354	86.801
7196	tRNA	TRG-GCC2-6	Mild&Severe_up	11.0988	71.4353	47.2788
100189208	tRNA	TRG-GCC2-2	Mild&Severe_up	16.3449	66.3376	65.338
100189380	tRNA	TRG-GCC2-1	Mild&Severe_up	88.6457	610.509	505.076
100009605	tRNA	TRF-GAA2-1	Mild&Severe_up	0.180891	1.33357	1.1276
100009606	tRNA	TRF-GAA1-4	Mild&Severe_up	1.64097	8.501	10.0997
100189254	tRNA	TRF-GAA1-2	Mild&Severe_up	0.141653	0.863487	0.910682
100189407	tRNA	TRE-TTC4-2	Mild&Severe_up	6.6806	15.0975	17.2465
7193	tRNA	TRE-TTC3-1	Mild&Severe_up	3.16117	8.09523	9.4891
100189030	tRNA	TRE-TTC2-1	Mild&Severe_up	133.616	345.568	427.868
100189409	tRNA	TRE-CTC2-1	Mild&Severe_up	147.943	332.008	378.156
100189269	tRNA	TRE-CTC1-7	Mild&Severe_up	162.956	619.393	623.326
100189024	tRNA	TRE-CTC1-6	Mild&Severe_up	159.736	369.989	428.462
100189017	tRNA	TRE-CTC1-5	Mild&Severe_up	163.217	633.066	652.348
100189259	tRNA	TRE-CTC1-4	Mild&Severe_up	160.216	614.134	648.001
100189385	tRNA	TRE-CTC1-3	Mild&Severe_up	157.837	615.591	630.325
100189091	tRNA	TRE-CTC1-2	Mild&Severe_up	163.102	634.496	644.739
100189384	tRNA	TRE-CTC1-1	Mild&Severe_up	158.388	363.28	434.829
100189383	tRNA	TRD-GTC2-11	Mild&Severe_up	3.97493	43.1392	40.8668
100189207	tRNA	TRD-GTC1-1	Mild&Severe_up	39.0181	108.819	121.155
100189232	tRNA	TRA-TGC3-2	Mild&Severe_up	0.324926	3.71536	3.3649
100189400	tRNA	TRA-CGC2-1	Mild&Severe_up	0.19628	2.5537	2.45285
100189046	tRNA	TRA-AGC4-1	Mild&Severe_up	0.914692	7.06157	8.51498
267	protein_coding	AMFR	Severe_up	5.27917	5.94126	21.3737
481	protein_coding	ATP1B1	Severe_up	0.735057	1.42186	4.4678
527	protein_coding	ATP6V0C	Severe_up	28.8477	30.5372	71.0304
537	protein_coding	ATP6AP1	Severe_up	1.82785	1.81802	4.8011
811	protein_coding	CALR	Severe_up	2.20135	3.84607	8.30884
824	protein_coding	CAPN2	Severe_up	7.84227	10.8885	24.0445
967	protein_coding	CD63	Severe_up	16.8014	28.7179	48.9194
968	protein_coding	CD68	Severe_up	14.4081	15.0495	34.9208
1176	protein_coding	AP3S1	Severe_up	2.93708	3.62906	7.15705
1183	protein_coding	CLCN4	Severe_up	0.912603	1.17987	2.44887
1428	protein_coding	CRYM	Severe_up	0.24444	0.42252	1.18663
1486	protein_coding	CTBS	Severe_up	1.54155	2.04879	3.71759
1611	protein_coding	DAP	Severe_up	3.73556	3.51994	9.98944
2180	protein_coding	ACSL1	Severe_up	1.35158	2.74412	8.32913
2821	protein_coding	GPI	Severe_up	1.70033	1.95917	5.55771
3045	protein_coding	HBD	Severe_up	0.148307	0.217156	1.55819
3046	protein_coding	HBE1	Severe_up	0.179204	1.73394	4.51318
3091	protein_coding	HIF1A	Severe_up	2.32463	3.37734	6.81129
3106	protein_coding	HLA-B	Severe_up	42.9006	49.0382	129.823
3842	protein_coding	TNPO1	Severe_up	3.90421	4.72129	8.16543
4097	protein_coding	MAFG	Severe_up	0.990622	1.2874	2.70883
4121	protein_coding	MAN1A1	Severe_up	4.6499	4.16077	10.2515
4129	protein_coding	MAOB	Severe_up	0.355176	0.25306	1.26353
4131	protein_coding	MAP1B	Severe_up	0.531457	0.404732	3.87908
4133	protein_coding	MAP2	Severe_up	0.170709	0.150313	0.914737
4300	protein_coding	MLLT3	Severe_up	1.81436	2.0569	4.10433
4312	protein_coding	MMP1	Severe_up	0.115908	0.097243	1.10676
4637	protein_coding	MYL6	Severe_up	167.94	183.445	408.457
4673	protein_coding	NAP1L1	Severe_up	112.925	121.696	358.274
4811	protein_coding	NID1	Severe_up	0.510417	0.461898	1.36727
4814	protein_coding	NINJ1	Severe_up	1.00537	1.48368	3.23808
5034	protein_coding	P4HB	Severe_up	1.8953	1.96778	4.88722
5055	protein_coding	SERPINB2	Severe_up	0.0118804	0.195569	0.941411
5093	protein_coding	PCBP1	Severe_up	15.3577	16.3658	34.7514
5552	protein_coding	SRGN	Severe_up	84.7879	110.25	236.762
5575	protein_coding	PRKAR1B	Severe_up	1.78815	1.18669	4.62929
5579	protein_coding	PRKCB	Severe_up	9.26318	9.06006	29.2686
5628	pseudogene	PROS2P	Severe_up	1.22127	1.11304	3.24002
5717	protein_coding	PSMD11	Severe_up	1.91489	3.37781	5.70051
6005	protein_coding	RHAG	Severe_up	0.035185	0.0180799	1.75557
6252	protein_coding	RTN1	Severe_up	1.60309	1.45528	3.90631
6279	protein_coding	S100A8	Severe_up	82.4156	185.298	587.205
6503	protein_coding	SLA	Severe_up	1.22432	2.20914	4.30115
6622	protein_coding	SNCA	Severe_up	14.5863	19.6617	40.6017
6652	protein_coding	SORD	Severe_up	0.230895	0.378989	2.22776
6907	protein_coding	TBL1X	Severe_up	0.482017	0.538857	1.50966
7076	protein_coding	TIMP1	Severe_up	10.986	13.3412	25.5837
7388	protein_coding	UQCRH	Severe_up	64.9979	87.8662	148.3
7812	protein_coding	CSDE1	Severe_up	12.8931	13.214	30.0684
8073	protein_coding	PTP4A2	Severe_up	32.3282	47.7092	83.1648
8372	protein_coding	HYAL3	Severe_up	0.306591	0.221392	0.996879
8574	protein_coding	AKR7A2	Severe_up	0.608032	0.468614	1.71712
8754	protein_coding	ADAM9	Severe_up	4.62966	4.46616	10.6656
8804	protein_coding	CREG1	Severe_up	7.57576	11.8117	27.8649
9334	protein_coding	B4GALT5	Severe_up	0.934552	1.65737	3.50547
9445	protein_coding	ITM2B	Severe_up	223.127	285.773	569.82
9577	protein_coding	BABAM2	Severe_up	1.3567	1.36199	2.67215
10095	protein_coding	ARPC1B	Severe_up	55.2598	54.6978	150.954
10135	protein_coding	NAMPT	Severe_up	3.25774	6.27225	12.9759
10152	protein_coding	ABI2	Severe_up	1.23895	1.32646	2.53987
10186	protein_coding	LHFPL6	Severe_up	0.318372	0.265911	1.82647
10225	protein_coding	CD96	Severe_up	0.762191	0.640266	5.16249
10226	protein_coding	PLIN3	Severe_up	1.00687	1.77553	3.67458
10553	protein_coding	HTATIP2	Severe_up	3.85716	3.75757	13.0609
10855	protein_coding	HPSE	Severe_up	1.04878	1.05281	6.03303
10857	protein_coding	PGRMC1	Severe_up	114.533	168.349	436.817
10981	protein_coding	RAB32	Severe_up	9.43358	12.1552	19.6669
10983	protein_coding	CCNI	Severe_up	15.8396	26.1609	52.5502
11013	protein_coding	TMSB15A	Severe_up	1.78516	3.1589	9.99995
11034	protein_coding	DSTN	Severe_up	9.12623	8.21842	30.4871
22870	protein_coding	PPP6R1	Severe_up	1.76913	1.61425	4.30023
23204	protein_coding	ARL6IP1	Severe_up	10.6188	13.0287	24.6281
23406	protein_coding	COTL1	Severe_up	30.3912	32.0701	83.1283
23446	protein_coding	SLC44A1	Severe_up	3.03431	2.48004	7.00119
23710	protein_coding	GABARAPL1	Severe_up	1.10681	1.32942	2.94672
23762	protein_coding	OSBP2	Severe_up	1.97355	1.27838	6.44413
25907	protein_coding	TMEM158	Severe_up	18.3742	20.8355	128.609
25934	protein_coding	NIPSNAP3A	Severe_up	2.04099	2.79446	4.73027
27075	protein_coding	TSPAN13	Severe_up	4.30818	4.07114	12.4048
51144	protein_coding	HSD17B12	Severe_up	1.5455	1.53486	4.29903
51390	protein_coding	AIG1	Severe_up	4.77492	4.61541	8.8874
51398	protein_coding	WDR83OS	Severe_up	9.51682	9.79152	20.5791
51465	protein_coding	UBE2J1	Severe_up	5.70417	6.29683	13.2898
54386	protein_coding	TERF2IP	Severe_up	3.77392	4.25608	7.99462
54516	protein_coding	MTRF1L	Severe_up	2.71925	2.17008	6.51261
54662	protein_coding	TBC1D13	Severe_up	0.77262	0.693046	2.08885
54749	protein_coding	EPDR1	Severe_up	0.332818	0.275594	1.08706
54926	protein_coding	UBE2R2	Severe_up	3.62208	4.8683	9.82835
55353	protein_coding	LAPTM4B	Severe_up	2.90421	3.55828	8.03425
55454	protein_coding	CSGALNACT2	Severe_up	1.65301	3.0908	5.31628
55731	protein_coding	FAM222B	Severe_up	0.662125	0.630025	1.57415
55973	protein_coding	BCAP29	Severe_up	1.5446	1.62842	3.79825
56270	protein_coding	WDR45B	Severe_up	1.18853	1.61937	3.18926
57157	protein_coding	PHTF2	Severe_up	2.31784	2.32121	4.84915
57162	protein_coding	PELI1	Severe_up	1.85841	4.15589	7.58842
57446	protein_coding	NDRG3	Severe_up	0.886164	0.931462	2.45097
64092	protein_coding	SAMSN1	Severe_up	1.04091	2.11224	5.24667
64116	protein_coding	SLC39A8	Severe_up	0.824938	1.17205	2.32782
64645	protein_coding	MFSD14A	Severe_up	1.75681	2.47945	4.28848
80228	protein_coding	ORAI2	Severe_up	0.951365	0.98	2.15333
81689	protein_coding	ISCA1	Severe_up	6.9589	8.04904	14.5588
83930	protein_coding	STARD3NL	Severe_up	1.76495	1.7551	4.19243
84548	protein_coding	TMEM185A	Severe_up	4.36664	5.50395	8.88339
84617	protein_coding	TUBB6	Severe_up	0.595482	1.42538	2.94889
90135	protein_coding	BTBD6	Severe_up	0.713296	0.727152	2.2309
91612	protein_coding	CHURC1	Severe_up	4.31318	4.56404	17.1639
91663	protein_coding	MYADM	Severe_up	3.77218	8.91171	17.9421
112495	protein_coding	GTF3C6	Severe_up	6.20533	7.71954	15.6848
118433	transcribed_pseudogene	RPL23AP7	Severe_up	0.747149	1.32387	6.35127
123606	protein_coding	NIPA1	Severe_up	1.29622	1.51926	3.68123
124446	protein_coding	TMEM219	Severe_up	8.23796	9.28399	17.4141
134429	protein_coding	STARD4	Severe_up	0.609584	1.20586	2.59791
150786	protein_coding	RAB6D	Severe_up	0.177217	0.076088	1.83253
160851	protein_coding	DGKH	Severe_up	0.228503	0.225685	0.964721
200942	protein_coding	KLHDC8B	Severe_up	0.339445	0.442595	1.43439
203547	protein_coding	VMA21	Severe_up	1.87282	2.76366	4.93712
257019	protein_coding	FRMD3	Severe_up	18.5155	26.51	46.4013
284942	transcribed_pseudogene	RPL23AP82	Severe_up	0.214139	0.380081	1.64017
387882	protein_coding	C12orf75	Severe_up	14.838	19.2099	49.6799
388574	transcribed_pseudogene	RPL23AP87	Severe_up	0.0825122	0.251865	1.30012
439953	pseudogene	PPIAP31	Severe_up	1.70444	2.31679	4.48106
441024	protein_coding	MTHFD2L	Severe_up	4.74796	5.95656	9.59669
643180	transcribed_pseudogene	CCT6P3	Severe_up	1.75697	2.42911	6.79693
646309	pseudogene	NAMPTP1	Severe_up	0.931056	2.14046	4.67787
647087	protein_coding	STMP1	Severe_up	24.4069	30.663	60.12
729009	pseudogene	FTH1P20	Severe_up	45.1432	51.3145	139.795
100009607	tRNA	TRH-GTG1-6	Severe_up	57.0856	72.7696	112.731
100129361	protein_coding	SMIM10L1	Severe_up	0.800976	1.09731	2.71155
100147744	snRNA	RNU7-1	Severe_up	1.15738	3.06327	6.43522
100189174	tRNA	TRH-GTG1-4	Severe_up	55.8519	73.558	121.842
100189307	tRNA	TRH-GTG1-3	Severe_up	37.7144	55.6117	88.1972
100271626	pseudogene	RPL23AP79	Severe_up	0.823135	2.69859	26.4428
100287016	pseudogene	DSTNP3	Severe_up	1.33094	1.35402	4.6516
100874444	pseudogene	HMGN1P18	Severe_up	0.495648	0.803181	2.11706
106481619	pseudogene	RNU1-88P	Severe_up	1.71637	4.74636	8.25071
106635682	snoRNA	SNORD140	Severe_up	11.6451	15.1093	29.9919
107986954	lncRNA	LOC107986954	Severe_up	0.0566265	0.187156	4.11223
2353	protein_coding	FOS	Mild_up	2.67793	14.4925	8.77874
3553	protein_coding	IL1B	Mild_up	0.461133	2.57742	1.22495
6428	protein_coding	SRSF3	Mild_up	5.88293	16.5706	10.3646
6446	protein_coding	SGK1	Mild_up	0.867378	5.41703	2.46952
9937	protein_coding	DCLRE1A	Mild_up	1.1819	2.58303	1.35588
10964	protein_coding	IFI44L	Mild_up	0.23835	2.41981	0.912735
26212	protein_coding	OR2B6	Mild_up	0.667633	2.61315	1.34818
91543	protein_coding	RSAD2	Mild_up	0.277147	2.52681	0.914331
100189181	tRNA	TRR-CCT2-1	Mild_up	10.14	31.7309	19.5743
100189314	tRNA	TRG-GCC2-3	Mild_up	17.3649	61.0299	39.5409
100189406	tRNA	TRR-CCT4-1	Mild_up	129.873	412.244	224.733
107985757	tRNA	TRNAN-GUU	Mild_up	0.358368	1.36307	1.00725
3579	protein_coding	CXCR2	Mild&Severe_down	2.06911	0.684046	0.875893
6084	Y_RNA	RNY1	Mild&Severe_down	4987.34	1759.76	1965.71
6085	Y_RNA	RNY3	Mild&Severe_down	26113.5	8292.1	6613.2
6086	Y_RNA	RNY4	Mild&Severe_down	49682.9	14957.6	11803
6209	protein_coding	RPS15	Mild&Severe_down	16.0647	5.66096	7.74515
6232	protein_coding	RPS27	Mild&Severe_down	98.7259	43.8381	58.0811
7121	pseudogene	TMSB4XP7	Mild&Severe_down	0.77441	0.134595	0.155805
8347	protein_coding	HIST1H2BC	Mild&Severe_down	47.5186	25.4892	23.0577
9750	protein_coding	RIPOR2	Mild&Severe_down	8.94219	4.5986	5.03929
26770	snoRNA	SNORD79	Mild&Severe_down	566.342	163.59	175.924
26774	snoRNA	SNORD80	Mild&Severe_down	2340.35	606.109	667.532
26789	snoRNA	SNORD59A	Mild&Severe_down	559.57	156.968	183.507
26790	snoRNA	SNORD58B	Mild&Severe_down	46.33	11.8849	17.4285
26792	snoRNA	SNORD57	Mild&Severe_down	298.796	85.5051	99.3597
26795	snoRNA	SNORD54	Mild&Severe_down	223.257	42.1947	61.718
26799	snoRNA	SNORD50A	Mild&Severe_down	265.548	85.765	109.642
26811	snoRNA	SNORD55	Mild&Severe_down	207.633	46.6276	72.5726
26818	snoRNA	SNORD33	Mild&Severe_down	79.962	15.4735	20.6514
26819	snoRNA	SNORD32A	Mild&Severe_down	1750.91	506.129	606.173
28526	C_region	TRDC	Mild&Severe_down	2.30638	0.714978	0.831571
55303	protein_coding	GIMAP4	Mild&Severe_down	4.94252	2.26468	1.53941
85389	snoRNA	SNORD14C	Mild&Severe_down	1217.32	405.246	542.146
148898	lncRNA	ZNF436-AS1	Mild&Severe_down	8.66398	0.250228	0.161913
168537	protein_coding	GIMAP7	Mild&Severe_down	3.05082	0.905558	0.835992
389112	pseudogene	RPS27P4	Mild&Severe_down	12.4665	4.60273	5.97217
392748	pseudogene	RPS27P17	Mild&Severe_down	3.6636	1.57032	1.98206
406891	miRNA	MIRLET7I	Mild&Severe_down	9.68006	1.09736	0.642616
406890	miRNA	MIRLET7G	Mild&Severe_down	3.16064	0.233297	0.199566
406889	miRNA	MIRLET7F2	Mild&Severe_down	4.98584	0.356608	0.302167
406888	miRNA	MIRLET7F1	Mild&Severe_down	6.43526	3.93154	2.58
406886	miRNA	MIRLET7D	Mild&Severe_down	4.66663	0.552675	0.322557
406895	miRNA	MIR103A1	Mild&Severe_down	6.97338	0.397929	0.181172
406913	miRNA	MIR126	Mild&Severe_down	7.51563	0.519107	0.202574
406931	miRNA	MIR139	Mild&Severe_down	2.34784	0.174873	0.106941
406949	miRNA	MIR15B	Mild&Severe_down	1.40304	0.159973	0.136645
406950	miRNA	MIR16-1	Mild&Severe_down	2.60143	0.149445	0.144078
406951	miRNA	MIR16-2	Mild&Severe_down	0.976092	0.120262	0.0720254
406955	miRNA	MIR181B1	Mild&Severe_down	1.0033	0.131293	0.247561
406966	miRNA	MIR191	Mild&Severe_down	17.0972	1.62855	0.482315
406991	miRNA	MIR21	Mild&Severe_down	20.7727	2.40522	1.32901
407006	miRNA	MIR221	Mild&Severe_down	2.65055	0.283827	0.309456
407007	miRNA	MIR222	Mild&Severe_down	31.5414	3.00982	1.12689
407009	miRNA	MIR224	Mild&Severe_down	3.72914	0.244828	0.0732961
407010	miRNA	MIR23A	Mild&Severe_down	13.4077	1.32194	1.00635
407011	miRNA	MIR23B	Mild&Severe_down	0.91324	0.0588237	0.0288315
407014	miRNA	MIR25	Mild&Severe_down	1.97059	0.337655	0.183857
407015	miRNA	MIR26A1	Mild&Severe_down	6.2676	0.471196	0.180913
407031	miRNA	MIR30C1	Mild&Severe_down	1.564	0.131093	0.0448879
407032	miRNA	MIR30C2	Mild&Severe_down	1.939	0.0709482	0.0237001
407033	miRNA	MIR30D	Mild&Severe_down	8.00198	0.723367	0.257178
407037	miRNA	MIR320A	Mild&Severe_down	7.24007	0.108223	0.0438853
407048	miRNA	MIR92A1	Mild&Severe_down	17.8389	3.41581	1.57026
407049	miRNA	MIR92A2	Mild&Severe_down	16.7301	2.31365	1.04837
407050	miRNA	MIR93	Mild&Severe_down	3.00226	0.171368	0.0954883
407054	miRNA	MIR98	Mild&Severe_down	1.14188	0.213755	0.20881
442893	miRNA	MIR151A	Mild&Severe_down	1.27296	0.0562263	0.0364935
442908	miRNA	MIR340	Mild&Severe_down	1.54763	0.219124	0.208881
445347	protein_coding	TARP	Mild&Severe_down	4.17502	1.04579	1.28286
494335	miRNA	MIR423	Mild&Severe_down	9.31235	0.797219	0.665963
494337	miRNA	MIR425	Mild&Severe_down	29.9111	3.0277	1.68386
574411	miRNA	MIR451A	Mild&Severe_down	105.495	13.9912	6.89003
574413	miRNA	MIR409	Mild&Severe_down	1.06701	0.0569065	0.0205257
594838	snoRNA	SNORD100	Mild&Severe_down	852.748	234.459	329.361
606500	snoRNA	SNORD68	Mild&Severe_down	4361.42	867.966	1018.91
619570	snoRNA	SNORD95	Mild&Severe_down	654.909	213.96	258.518
619571	snoRNA	SNORD96A	Mild&Severe_down	92.9754	26.6234	35.587
692111	snoRNA	SNORD71	Mild&Severe_down	472.305	129.848	157.958
692158	snoRNA	SNORA57	Mild&Severe_down	2085.08	689.3	766.844
692200	snoRNA	SNORD103C	Mild&Severe_down	42.4358	11.4698	15.761
692212	snoRNA	SNORD99	Mild&Severe_down	193.807	37.0951	48.9986
692213	snoRNA	SNORD110	Mild&Severe_down	5402.4	1202.27	1239.51
692233	snoRNA	SNORD117	Mild&Severe_down	119.422	25.2076	29.1312
692234	snoRNA	SNORD103A	Mild&Severe_down	400.764	118.133	130.958
692235	snoRNA	SNORD103B	Mild&Severe_down	396.145	118.061	137.911
768216	miRNA	MIR454	Mild&Severe_down	2.27447	0.153812	0.0835883
100033414	snoRNA	SNORD116-2	Mild&Severe_down	35.0452	6.79528	8.1659
100033415	snoRNA	SNORD116-3	Mild&Severe_down	66.277	18.9838	16.2798
100033420	snoRNA	SNORD116-8	Mild&Severe_down	28.4493	6.59964	8.50636
100033421	snoRNA	SNORD116-9	Mild&Severe_down	71.1748	19.0964	16.9731
100113382	snoRNA	SNORD105B	Mild&Severe_down	420.246	81.509	105.184
100113391	snoRNA	SNORD126	Mild&Severe_down	43.9672	10.3694	13.4782
100126317	miRNA	MIR374B	Mild&Severe_down	1.68398	0.215786	0.210703
100169850	pseudogene	RNY4P7	Mild&Severe_down	9525.21	1346.61	779.508
100287029	transcribed_pseudogene	DDX11L10	Mild&Severe_down	22.3658	5.70893	4.97078
100287102	transcribed_pseudogene	DDX11L1	Mild&Severe_down	5.52739	1.77529	1.253
100287596	transcribed_pseudogene	DDX11L5	Mild&Severe_down	5.52111	1.70529	1.23295
100288486	transcribed_pseudogene	DDX11L9	Mild&Severe_down	7.39623	2.45786	1.78754
100302285	miRNA	MIR1244-1	Mild&Severe_down	1746.47	360.856	867.086
100379287	pseudogene	RNY4P6	Mild&Severe_down	72.2318	22.7401	15.4237
100379288	pseudogene	RNY4P11	Mild&Severe_down	94.5884	12.5991	5.45994
100379295	pseudogene	RNY4P8	Mild&Severe_down	134.99	7.86118	4.49608
100379378	pseudogene	RNY4P20	Mild&Severe_down	2771.91	178.702	106.067
100379592	pseudogene	RNY4P10	Mild&Severe_down	5652.51	1057.6	650.281
100500819	miRNA	MIR3609	Mild&Severe_down	522.081	152.688	155.015
100862664	pseudogene	RNY4P24	Mild&Severe_down	3.17518	0.980235	0.968462
100862665	pseudogene	RNY4P25	Mild&Severe_down	19.4156	4.49324	2.31552
100862668	pseudogene	RNY3P2	Mild&Severe_down	7.90371	2.74969	1.8601
100873749	pseudogene	RNU6-34P	Mild&Severe_down	9.51376	4.04529	4.86807
100873808	pseudogene	RNY3P4	Mild&Severe_down	21.1865	8.6226	5.38779
100873821	pseudogene	RNY4P27	Mild&Severe_down	12514.4	2810.17	1692.58
100873823	pseudogene	RNY4P29	Mild&Severe_down	7.26522	0.218953	0.185954
102725121	transcribed_pseudogene	LOC102725121	Mild&Severe_down	6.63224	2.14077	1.35745
106478984	pseudogene	RNY3P1	Mild&Severe_down	1756.81	621.76	674.659
106478985	pseudogene	RNY3P8	Mild&Severe_down	138.167	39.4221	26.4079
106479667	pseudogene	RNU6-225P	Mild&Severe_down	0.864031	0.0167148	0.0244875
106479892	pseudogene	RNU6-738P	Mild&Severe_down	19.1989	0.289279	0.539387
106480169	pseudogene	RNU1-67P	Mild&Severe_down	65.4926	21.0406	32.0752
106480309	pseudogene	RNY1P12	Mild&Severe_down	30.389	13.0383	17.1864
106480315	pseudogene	RNY3P12	Mild&Severe_down	3.383	0.129657	0.196265
106481447	pseudogene	RNU6-842P	Mild&Severe_down	0.915696	0.046163	0.0543601
106481712	pseudogene	RNY4P34	Mild&Severe_down	84.5344	30.7198	22.4161
106481713	pseudogene	RNY3P11	Mild&Severe_down	33.4726	0.749544	0.425784
106481714	pseudogene	RNY3P13	Mild&Severe_down	166.78	41.3947	26.92
106633804	snoRNA	SNORD135	Mild&Severe_down	112.254	23.5205	32.4679
109616979	snoRNA	SNORD38D	Mild&Severe_down	33.7962	2.88364	4.46177
406882	miRNA	MIRLET7A2	Mild&Severe_down	11.1011	0.341313	0.231563
406881	miRNA	MIRLET7A1	Mild&Severe_down	7.7432	1.03895	0.58652
