# Supplementary material for: Plasma cell-free RNA characteristics in COVID-19 patients
Source: HighWire-hosted journal article supplement (doi:10.1101/gr.276175.121), 2022-01-21
Supplement: Supplemental_Table_S3_.xlsx [file Supplemental_Table_S3_.xlsx]

## Sheet: AUC_7_markes
Table S3. AUC of 7 COVID-19 markers.
Entrez Gene ID	Symbol	Category	Description	AUC
100189103	TRR-ACG2-1	tRNA	#N/A	0.94
100189428	TRR-ACG2-4	tRNA	#N/A	0.93
6030	RN7SL4P	pseudogene	RNA, 7SL, cytoplasmic 4, pseudogene	0.93
100189285	TRS-GCT3-1	tRNA	#N/A	0.91
100189385	TRE-CTC1-3	tRNA	#N/A	0.89
100189365	TRR-CCG1-1	tRNA	#N/A	0.86
100189091	TRE-CTC1-2	tRNA	#N/A	0.86

## Sheet: Logistic regression gene
Entrez Gene ID	Symbol	Category	Description
6030	RN7SL4P	pseudogene	RNA, 7SL, cytoplasmic 4, pseudogene
100189091	TRE-CTC1-2	tRNA	#N/A
100189103	TRR-ACG2-1	tRNA	#N/A
100189285	TRS-GCT3-1	tRNA	#N/A
100189365	TRR-CCG1-1	tRNA	#N/A
100189385	TRE-CTC1-3	tRNA	#N/A
100189428	TRR-ACG2-4	tRNA	#N/A
4637	MYL6	protein_coding	myosin light chain 6
4673	NAP1L1	protein_coding	nucleosome assembly protein 1 like 1
6279	S100A8	protein_coding	S100 calcium binding protein A8
7239	TRV-AAC1-4	tRNA	#N/A
7388	UQCRH	protein_coding	ubiquinol-cytochrome c reductase hinge protein
8073	PTP4A2	protein_coding	protein tyrosine phosphatase type IVA, member 2
8848	TSC22D1	protein_coding	TSC22 domain family member 1
9445	ITM2B	protein_coding	integral membrane protein 2B
10209	EIF1	protein_coding	eukaryotic translation initiation factor 1
10857	PGRMC1	protein_coding	progesterone receptor membrane component 1
25907	TMEM158	protein_coding	transmembrane protein 158 (gene/pseudogene)
26863	RNVU1-18	snRNA	RNA, variant U1 small nuclear 18
26864	RNVU1-7	snRNA	RNA, variant U1 small nuclear 7
26869	RNU1-3	snRNA	RNA, U1 small nuclear 3
26871	RNU1-1	snRNA	RNA, U1 small nuclear 1
27018	BEX3	protein_coding	brain expressed X-linked 3
387882	C12orf75	protein_coding	chromosome 12 open reading frame 75
729009	FTH1P20	pseudogene	ferritin heavy chain 1 pseudogene 20
780851	SNORD3A	snoRNA	small nucleolar RNA, C/D box 3A
780853	SNORD3C	snoRNA	small nucleolar RNA, C/D box 3C
791230	TRV-AAC1-5	tRNA	#N/A
791231	TRV-AAC3-1	tRNA	#N/A
100049614	TRV-CAC1-5	tRNA	#N/A
100188992	TRV-AAC2-1	tRNA	#N/A
100189017	TRE-CTC1-5	tRNA	#N/A
100189024	TRE-CTC1-6	tRNA	#N/A
100189030	TRE-TTC2-1	tRNA	#N/A
100189034	TRR-TCG5-1	tRNA	#N/A
100189086	TRT-CGT2-1	tRNA	#N/A
100189107	TRK-CTT1-1	tRNA	#N/A
100189110	TRK-CTT2-4	tRNA	#N/A
100189133	TRR-TCT1-1	tRNA	#N/A
100189161	TRV-AAC4-1	tRNA	#N/A
100189198	TRK-CTT2-1	tRNA	#N/A
100189207	TRD-GTC1-1	tRNA	#N/A
100189208	TRG-GCC2-2	tRNA	#N/A
100189245	TRT-CGT4-1	tRNA	#N/A
100189259	TRE-CTC1-4	tRNA	#N/A
100189269	TRE-CTC1-7	tRNA	#N/A
100189283	TRV-TAC2-1	tRNA	#N/A
100189314	TRG-GCC2-3	tRNA	#N/A
100189380	TRG-GCC2-1	tRNA	#N/A
100189384	TRE-CTC1-1	tRNA	#N/A
100189406	TRR-CCT4-1	tRNA	#N/A
100189409	TRE-CTC2-1	tRNA	#N/A
100189416	TRV-CAC3-1	tRNA	#N/A
100271626	RPL23AP79	pseudogene	ribosomal protein L23a pseudogene 79
106481641	RNU2-23P	pseudogene	RNA, U2 small nuclear 23, pseudogene
107986852	LOC107986852	lncRNA	#N/A
3106	HLA-B	protein_coding	major histocompatibility complex, class I, B
