# Supplementary material for: Plasma cell-free RNA characteristics in COVID-19 patients
Source: HighWire-hosted journal article supplement (doi:10.1101/gr.276175.121), 2022-01-21
Supplement: Supplemental_Table_S4.HX.xlsx [file Supplemental_Table_S4.HX.xlsx]

## Sheet: Table S4
Table S4. Tabulated data of 4,324 detected lncRNA genes.
Gene ID	Category	Symbol	Gene_anno	Gene_locus	Gene_length	Type	Mean.TPM_Control	Mean.TPM_Mild	Mean.TPM_Severe	Classification (intergenic/Genic)
100527950	lncRNA	GJA9-MYCBP	GJA9-MYCBP readthrough	NC_000001.11:38862490-38881626[-]	19137	Severe up (only)	0	0.494523	0.604714	Genic
84981	lncRNA	MIR22HG	MIR22 host gene	NC_000017.11:1711504-1716272[-]	4769	Severe up (only)	0.261577	0.856601	1.4734	Genic
100507602	lncRNA	TRIM52-AS1	TRIM52 antisense RNA 1 (head to head)	NC_000005.10:181261212-181272307[+]	11096	Severe up (only)	0.766002	1.14633	1.87367	Genic
148898	lncRNA	ZNF436-AS1	ZNF436 antisense RNA 1	NC_000001.11:23368971-23371839[+]	2869	COVID-19 (down)	8.66398	0.250228	0.161913	Genic
107986954	lncRNA	LOC107986954	#N/A	NC_000008.11:85973793-85978606[-]	4814	COVID-19 (up)	0.0566265	0.187156	4.11223	Intergenic
107986852	lncRNA	LOC107986852	#N/A	NC_000007.14:139035877-139036950[+]	1074	COVID-19 (up)	38.7055	171.899	163.493	Genic
100533955	lncRNA	SENP3-EIF4A1	SENP3-EIF4A1 readthrough (NMD candidate)	NC_000017.11:7561992-7579006[+]	17015	COVID-19 (up)	0.0597435	0.694107	0.783764	Genic
105374985	lncRNA	LOC105374985	#N/A	NC_000006.12:26280023-26285027[-]	5005	COVID-19 (up)	5.9647	21.3614	22.2252	Intergenic
105378909	lncRNA	LOC105378909	#N/A	NC_000001.11:112229673-112360678[-]	131006	Mild down (only)	3.25662	1.76259	1.83868	Intergenic
107986233	lncRNA	LINC01218	#N/A	NC_000004.12:100811429-100816063[-]	4635	Mild down (only)	2.74855	0.646442	4.01179	Intergenic
388685	lncRNA	LINC01138	long intergenic non-protein coding RNA 1138	NC_000001.11:148432959-148459920[-]	26962	Mild down (only)	1.31973	0.431692	0.598971	Intergenic
283089	lncRNA	WDR11-AS1	WDR11 antisense RNA 1	NC_000010.11:120761812-120851179[-]	89368	Severe down (only)	2.66832	1.56391	1.05685	Genic
107984727	lncRNA	LOC107984727	#N/A	NC_000015.10:101255360-101255902[-]	543	Severe down (only)	8.26093	3.81763	2.51061	Intergenic
107984271	lncRNA	LOC107984271	#N/A	NC_000010.11:113844254-113852716[+]	8463	Severe down (only)	5.77602	3.05653	2.15927	Genic
101927854	lncRNA	LOC101927854	uncharacterized LOC101927854	NC_000003.12:24151324-24189956[+]	38633	Severe down (only)	25.8437	16.9574	15.375	Genic
105376475	lncRNA	LOC105376475	#N/A	NC_000010.11:29782397-29784064[-]	1668	Severe down (only)	3.50267	2.37857	1.93031	Intergenic
105377459	lncRNA	LOC105377459	#N/A	NC_000004.12:143843401-143969377[+]	125977	Severe down (only)	2.80571	1.89579	1.29739	Genic
100130231	lncRNA	LINC00861	long intergenic non-protein coding RNA 861	NC_000008.11:125922523-125951197[-]	28675	Severe down (only)	0.969434	0.207052	0.182863	Intergenic
400360	lncRNA	C15orf54	chromosome 15 open reading frame 54 (putative)	NC_000015.10:39250669-39254845[+]	4177	Severe down (only)	5.41493	4.30376	2.15099	Genic
493812	lncRNA	HCG11	HLA complex group 11 (non-protein coding)	NC_000006.12:26521706-26527393[+]	5688	_	1.27358	0.845246	1.33709	Genic
105375001	lncRNA	LOC105375001	#N/A	NC_000006.12:27473191-27480803[+]	7613	_	0.00458113	0.0371663	0.0390157	Genic
105377225	lncRNA	LOC105377225	#N/A	NC_000024.10:21138306-21197207[+]	58902	_	0.070646	0.000533383	0.0231439	Intergenic
90271	lncRNA	OLMALINC	oligodendrocyte maturation-associated long intergenic non-coding RNA	NC_000010.11:100373576-100388354[+]	14779	_	0.0148812	0.00291858	0.00120294	Intergenic
105374986	lncRNA	LOC105374986	#N/A	NC_000006.12:26256789-26262763[+]	5975	_	4.17279	6.09636	4.01052	Intergenic
107987071	lncRNA	LOC107987071	#N/A	NC_000009.12:65820966-65825407[-]	4442	_	0.0437846	0.17031	0.0825067	Intergenic
100505636	lncRNA	MALINC1	mitosis associated long intergenic non-coding RNA 1	NC_000005.10:140102922-140108012[-]	5091	_	0.0686874	0.0576614	0.0791793	Intergenic
729082	lncRNA	OIP5-AS1	OIP5 antisense RNA 1	NC_000015.10:41282697-41313338[+]	30642	_	1.68197	1.08446	1.6816	Genic
105376220	lncRNA	LOC105376220	#N/A	NC_000009.12:112027430-112040364[-]	12935	_	0.271553	0.0781744	0.243971	Intergenic
107984312	lncRNA	LOC107984312	#N/A	NC_000011.10:12184063-12191172[+]	7110	_	0.0500594	0.00711777	0.00942159	Genic
647979	lncRNA	NORAD	non-coding RNA activated by DNA damage	NC_000020.11:36045618-36050960[-]	5343	_	84.374	59.7025	102.12	Genic
378805	lncRNA	LINC-PINT	long intergenic non-protein coding RNA, p53 induced transcript	NC_000007.14:130877562-131109916[-]	232355	_	0.921777	1.36186	2.32035	Intergenic
645967	lncRNA	LOC645967	uncharacterized LOC645967	NC_000006.12:149717621-149718896[+]	1276	_	0.0233394	0.0927048	0.150577	Genic
399744	lncRNA	LINC00999	long intergenic non-protein coding RNA 999	NC_000010.11:38428146-38452153[+]	24008	_	0.00917863	0.00761148	0.00939476	Intergenic
101928419	lncRNA	LOC101928419	#N/A	NC_000005.10:56124145-56127275[+]	3131	_	8.54562	10.9905	17.0583	Genic
401321	lncRNA	LINC00997	long intergenic non-protein coding RNA 997	NC_000007.14:32758286-32762924[+]	4639	_	0.0116242	0.00630005	0.0164167	Intergenic
107986584	lncRNA	LOC107986584	#N/A	NC_000006.12:27505264-27519646[+]	14383	_	0	0.00263395	0.00262051	Genic
105369315	lncRNA	LOC105369315	#N/A	NC_000011.10:59087966-59106688[-]	18723	_	0.136735	0.0184438	0.0202113	Genic
379025	lncRNA	PSMA3-AS1	PSMA3 antisense RNA 1	NC_000014.9:58265365-58298137[-]	32773	_	4.91715	2.73861	4.39343	Genic
105375532	lncRNA	LOC105375532	#N/A	NC_000007.14:139939351-139947147[+]	7797	_	0.741837	0.408056	0.925094	Genic
100526833	lncRNA	SEPT5-GP1BB	SEPT5-GP1BB readthrough	NC_000022.11:19717220-19724774[+]	7555	_	5.1588	2.64969	6.037	Genic
105374162	lncRNA	LOC105374162	#N/A	NC_000003.12:152317553-152329247[+]	11695	_	2.07081	0.779293	1.27279	Genic
728975	lncRNA	LOC728975	uncharacterized LOC728975	NC_000011.10:65179871-65181834[-]	1964	_	10.3887	12.7649	14.7456	Genic
105374546	lncRNA	LOC105374546	uncharacterized LOC105374546	NC_000004.12:26859624-26860599[-]	976	_	0	0.136058	0.386484	Intergenic
107987081	lncRNA	LOC107987081	#N/A	NC_000009.12:77900719-77917451[-]	16733	_	0.31769	0.134041	0.244241	Genic
100507530	lncRNA	MCPH1-AS1	MCPH1 antisense RNA 1	NC_000008.11:6615603-6708209[-]	92607	_	0.48185	0.261745	0.281569	Genic
100132891	lncRNA	MSC-AS1	MSC antisense RNA 1	NC_000008.11:71843123-72056312[+]	213190	_	0.657576	0.358315	0.661067	Genic
100507347	lncRNA	VIM-AS1	VIM antisense RNA 1	NC_000010.11:17214239-17229985[-]	15747	_	25.2536	33.9658	21.3981	Genic
100533483	lncRNA	DNAAF4-CCPG1	DNAAF4-CCPG1 readthrough (NMD candidate)	NC_000015.10:55355223-55498584[-]	143362	_	0.0354294	0.051364	0.0747277	Genic
7503	lncRNA	XIST	X inactive specific transcript (non-protein coding)	NC_000023.11:73820651-73852753[-]	32103	_	0.452076	2.19155	0.289693	Genic
105369370	lncRNA	LOC105369370	#N/A	NC_000011.10:69366823-69372512[+]	5690	_	0.653514	0.300169	0.215515	Intergenic
105375056	lncRNA	LOC105375056	#N/A	NC_000006.12:41154028-41178568[+]	24541	_	6.48402	3.75454	4.13997	Genic
107986127	lncRNA	LOC107986127	#N/A	NC_000003.12:127744219-127751505[-]	7287	_	0.0221919	0.0538977	0.134221	Genic
285972	lncRNA	LINC00996	long intergenic non-protein coding RNA 996	NC_000007.14:150433654-150448140[+]	14487	_	0.00721675	0.00290863	0.00245999	Intergenic
400931	lncRNA	MIRLET7BHG	MIRLET7B host gene	NC_000022.11:46085997-46113928[+]	27932	_	0.0372484	0.0525247	0.00919884	Genic
100506035	lncRNA	LINC00989	long intergenic non-protein coding RNA 989	NC_000004.12:79492593-79576460[+]	83868	_	14.1407	10.2696	9.91363	Intergenic
414777	lncRNA	HCG18	HLA complex group 18 (non-protein coding)	NC_000006.12:30287397-30327156[-]	39760	_	0.24828	0.0855526	0.0893053	Genic
105371870	lncRNA	LOC105371870	#N/A	NC_000017.11:68166525-68189296[+]	22772	_	0.466148	0.177401	0.239225	Intergenic
101929356	lncRNA	LOC101929356	#N/A	NC_000002.12:151776342-151794406[-]	18065	_	0.182195	0.0252043	0.0402484	Intergenic
55449	lncRNA	DHRS4-AS1	DHRS4 antisense RNA 1	NC_000014.9:23938731-23955112[-]	16382	_	0.449913	0.226325	0.268463	Genic
105371967	lncRNA	LOC105371967	#N/A	NC_000018.10:3653056-3656282[+]	3227	_	1.58416	0.995869	0.853368	Genic
107986997	lncRNA	LOC107986997	#N/A	NC_000009.12:40949453-40992761[-]	43309	_	0.197666	0.0246761	0.0339425	Genic
100506965	lncRNA	PWAR6	Prader Willi/Angelman region RNA 6	NC_000015.10:25031873-25036490[+]	4618	_	0.179609	0.0674765	0.074647	Genic
407975	lncRNA	MIR17HG	miR-17-92a-1 cluster host gene	NC_000013.11:91347820-91354575[+]	6756	_	0.17046	0.068644	0.0651762	Genic
103021295	lncRNA	LOC103021295	uncharacterized LOC103021295	NC_000001.11:205957925-205958388[+]	464	_	1.70934	0.900585	1.23067	Intergenic
648987	lncRNA	LOC648987	uncharacterized LOC648987	NC_000005.10:43014729-43067439[-]	52711	_	0.283467	0.141821	0.201078	Genic
105377275	lncRNA	LOC105377275	#N/A	NC_000004.12:74038752-74042618[+]	3867	_	5.72281	4.15597	4.281	Genic
107984360	lncRNA	LOC107984360	#N/A	NC_000011.10:76659607-76663866[+]	4260	_	30.4369	20.16	24.1671	Genic
105378268	lncRNA	LOC105378268	#N/A	NC_000010.11:42637517-42645542[+]	8026	_	2.29094	1.82424	1.33396	Genic
107984459	lncRNA	LOC107984459	#N/A	NC_000012.12:10821816-10837507[-]	15692	_	0.0436096	0.0183567	0.0159938	Genic
100507463	lncRNA	PSMB8-AS1	PSMB8 antisense RNA 1 (head to head)	NC_000006.12:32844086-32846500[+]	2415	_	1.37657	0.65057	0.898716	Genic
100499405	lncRNA	LINC00987	long intergenic non-protein coding RNA 987	NC_000012.12:9240003-9262877[+]	22875	_	0.149676	0.0542138	0.11216	Intergenic
102724479	lncRNA	LOC102724479	#N/A	NC_000003.12:171460588-171469717[+]	9130	_	2.40292	1.73262	1.65981	Intergenic
105376621	lncRNA	LOC105376621	#N/A	NC_000011.10:33893959-33911110[+]	17152	_	2.17138	1.4014	1.24778	Intergenic
105370707	lncRNA	LOC105370707	#N/A	NC_000014.9:92508765-92513647[-]	4883	_	0.0217771	0.0321145	0.150949	Intergenic
112268446	lncRNA	LOC112268446	#N/A	NC_000003.12:112423301-112462050[-]	38750	_	0.210206	0.0764787	0.0514066	Intergenic
84740	lncRNA	AFAP1-AS1	AFAP1 antisense RNA 1	NC_000004.12:7754090-7778928[+]	24839	_	0.0948681	0.0475035	0.0343638	Genic
100134229	lncRNA	JHDM1D-AS1	JHDM1D antisense RNA 1 (head to head)	NC_000007.14:140177261-140179640[+]	2380	_	1.18669	0.928767	0.780385	Genic
728724	lncRNA	LINC00977	long intergenic non-protein coding RNA 977	NC_000008.11:129216467-129241240[-]	24774	_	0	0	0.00292115	Intergenic
731424	lncRNA	MIR3945HG	MIR3945 host gene	NC_000004.12:184843296-184855652[-]	12357	_	0	0.0173373	0.0336477	Genic
101928153	lncRNA	ITGA9-AS1	ITGA9 antisense RNA 1	NC_000003.12:37753689-37861780[-]	108092	_	2.19702	1.27633	1.73152	Genic
101928462	lncRNA	LOC101928462	#N/A	NC_000014.9:81052777-81172672[-]	119896	_	1.48305	0.639315	0.72773	Genic
105369968	lncRNA	LOC105369968	#N/A	NC_000012.12:108628344-108645249[+]	16906	_	0.0718823	0.0249727	0.019853	Genic
283683	lncRNA	LOC283683	uncharacterized LOC283683	NC_000015.10:22757857-22778737[+]	20881	_	0.110087	0.0603721	0.35503	Genic
105372098	lncRNA	LOC105372098	#N/A	NC_000018.10:47076100-47100870[-]	24771	_	0.0733975	0.0301923	0.0219896	Genic
107985079	lncRNA	LOC107985079	#N/A	NC_000017.11:77666976-77680754[+]	13779	_	0.11009	0.0189682	0.0160986	Intergenic
112267941	lncRNA	LOC112267941	#N/A	NC_000005.10:69982020-69993895[+]	11876	_	0.136555	0.0400352	0.0543314	Genic
108783654	lncRNA	LOC108783654	uncharacterized LOC108783654	NC_000017.11:42552436-42554802[-]	2367	_	0.110608	0.0431125	0.0491501	Genic
100507171	lncRNA	BOLA3-AS1	BOLA3 antisense RNA 1 (head to head)	NC_000002.12:74147981-74152389[+]	4409	_	0.771334	0.413116	0.527526	Genic
401093	lncRNA	MBNL1-AS1	MBNL1 antisense RNA 1	NC_000003.12:152262616-152269626[-]	7011	_	0.457975	0.270133	0.386893	Genic
101669764	lncRNA	GPR1-AS	GPR1 antisense RNA	NC_000002.12:206203376-206266243[+]	62868	_	0.0350833	0.0681833	0.112411	Genic
112268421	lncRNA	LOC112268421	#N/A	NC_000002.12:99815170-99823270[-]	8101	_	0.167894	0.062111	0.0710399	Genic
105374768	lncRNA	LOC105374768	#N/A	NC_000002.12:64299871-64344064[-]	44194	_	8.21277	8.11773	6.40989	Genic
440970	lncRNA	LINC00971	long intergenic non-protein coding RNA 971	NC_000003.12:84638405-84869575[-]	231171	_	0	0	4.09886e-05	Intergenic
105375402	lncRNA	LOC105375402	#N/A	NC_000007.14:93914500-93937984[-]	23485	_	0.519295	0.307554	0.183931	Genic
107984120	lncRNA	LOC107984120	#N/A	NC_000006.12:72753300-72807288[+]	53989	_	0.0900912	0.041469	0.0328172	Genic
144571	lncRNA	A2M-AS1	A2M antisense RNA 1 (head to head)	NC_000012.12:9065177-9068055[+]	2879	_	0.389639	0.115721	0.139202	Genic
100874218	lncRNA	ATP13A5-AS1	ATP13A5 antisense RNA 1	NC_000003.12:193307244-193314521[+]	7278	_	0.317241	0.0528019	0.0337868	Genic
84789	lncRNA	MGC2889	uncharacterized protein MGC2889	NC_000003.12:193241779-193243972[+]	2194	_	0.0185741	0.0349759	0.076736	Genic
107985544	lncRNA	LOC107985544	uncharacterized LOC107985544	NC_000022.11:30886056-30921779[-]	35724	_	0.0944808	0.0125477	0.0118102	Genic
157247	lncRNA	MGC27345	uncharacterized protein MGC27345	NC_000007.14:128297685-128307763[-]	10079	_	0.103968	0.0375444	0.0647349	Genic
105378482	lncRNA	LOC105378482	#N/A	NC_000010.11:110428880-110447518[-]	18639	_	0.0685439	0.228438	0.520972	Intergenic
101929947	lncRNA	LOC101929947	#N/A	NC_000002.12:172464262-172556170[-]	91909	_	1.97744	1.11542	1.32219	Genic
100271835	lncRNA	LIMS3-LOC440895	LIMS3-LOC440895 readthrough	NC_000002.12:109898432-109968574[+]	70143	_	6.57659	3.95203	5.49039	Genic
8123	lncRNA	PWAR5	Prader Willi/Angelman region RNA 5	NC_000015.10:24984860-24988232[+]	3373	_	0.621936	0.319266	0.379322	Genic
105373637	lncRNA	LOC105373637	#N/A	NC_000002.12:138485887-138501694[-]	15808	_	0.0344514	0.00514965	0.00618882	Intergenic
285958	lncRNA	SNHG15	small nucleolar RNA host gene 15	NC_000007.14:44983023-44986696[-]	3674	_	0.186516	0.686698	0.883931	Genic
440465	lncRNA	BAIAP2-AS1	BAIAP2 antisense RNA 1 (head to head)	NC_000017.11:81029133-81034719[-]	5587	_	0.128622	0.0333287	0.057784	Genic
729291	lncRNA	LOC729291	uncharacterized LOC729291	NC_000012.12:28185625-28190738[-]	5114	_	0.0958235	0.0474754	0.0516878	Genic
339201	lncRNA	ASB16-AS1	ASB16 antisense RNA 1	NC_000017.11:44175973-44186717[-]	10745	_	0.182869	0.0584469	0.0815581	Genic
100128262	lncRNA	TNK2-AS1	TNK2 antisense RNA 1	NC_000003.12:195908076-195913264[+]	5189	_	0.0924635	0.0298651	0.0351851	Genic
105369477	lncRNA	LOC105369477	#N/A	NC_000011.10:107223216-107318674[-]	95459	_	0.257823	0.0995255	0.117105	Intergenic
105374031	lncRNA	LOC105374031	#N/A	NC_000003.12:108094635-108123545[+]	28911	_	0.143143	0.0604708	0.0810639	Intergenic
114796	lncRNA	PSMG3-AS1	PSMG3 antisense RNA 1 (head to head)	NC_000007.14:1570073-1589626[+]	19554	_	0.0989682	0.0298232	0.0513147	Genic
100128288	lncRNA	LOC100128288	uncharacterized LOC100128288	NC_000017.11:8358413-8360541[-]	2129	_	0.121676	0.0279805	0.0392953	Intergenic
100507632	lncRNA	LINC00968	long intergenic non-protein coding RNA 968	NC_000008.11:56518318-56559823[-]	41506	_	0.016925	0.0127868	0.0154349	Intergenic
100507303	lncRNA	SNHG19	small nucleolar RNA host gene 19	NC_000016.10:2154782-2155358[-]	577	_	0.859476	0.150968	0.234259	Genic
349196	lncRNA	LINC00965	long intergenic non-protein coding RNA 965	NC_000008.11:7260619-7263492[-]	2874	_	0.00070525	0.00070005	0.000492102	Intergenic
107986196	lncRNA	LOC107986196	#N/A	NC_000004.12:151124210-151141113[+]	16904	_	0.0297802	0.0996418	0.203767	Genic
441951	lncRNA	ZFAS1	ZNFX1 antisense RNA 1	NC_000020.11:49278178-49289260[+]	11083	_	17.4225	16.3465	14.3781	Genic
100130691	lncRNA	LOC100130691	uncharacterized LOC100130691	NC_000002.12:177283508-177392691[-]	109184	_	0.0417296	0.0120934	0.0105606	Genic
107986698	lncRNA	LOC107986698	#N/A	NC_000007.14:18319733-18328125[+]	8393	_	0.123422	0.0574296	0.0363213	Genic
105379827	lncRNA	LOC105379827	#N/A	NC_000001.11:100409136-100418983[-]	9848	_	0.0475771	0.0752784	0.191463	Genic
100506190	lncRNA	LINC00963	long intergenic non-protein coding RNA 963	NC_000009.12:129488660-129513686[+]	25027	_	0.154701	0.0814611	0.166041	Intergenic
107984960	lncRNA	LOC107984960	#N/A	NC_000001.11:58435364-58450556[-]	15193	_	0.024189	0.00611433	0.00635017	Intergenic
107984176	lncRNA	LOC107984176	#N/A	NC_000010.11:26337489-26380805[-]	43317	_	11.5949	9.76112	6.22674	Intergenic
100128252	lncRNA	ZNF667-AS1	ZNF667 antisense RNA 1 (head to head)	NC_000019.10:56477874-56495437[+]	17564	_	0.622404	0.597315	0.426323	Genic
114614	lncRNA	MIR155HG	MIR155 host gene	NC_000021.9:25562145-25575168[+]	13024	_	0.00368912	0.0886538	0.0962227	Genic
105378500	lncRNA	LOC105378500	#N/A	NC_000010.11:117240038-117242766[-]	2729	_	1.73462	0.978022	1.13974	Genic
283392	lncRNA	TRHDE-AS1	TRHDE antisense RNA 1	NC_000012.12:72253507-72273509[-]	20003	_	0.0190827	0.0227197	0.0946988	Genic
100507392	lncRNA	SENCR	smooth muscle and endothelial cell enriched migration/differentiation-associated lncRNA	NC_000011.10:128691672-128696023[-]	4352	_	0.717599	0.424049	0.493029	Genic
101928324	lncRNA	LOC101928324	uncharacterized LOC101928324	NC_000001.11:26462756-26467537[-]	4782	_	0.0791556	0.0139124	0.00927903	Genic
401588	lncRNA	ZNF674-AS1	ZNF674 antisense RNA 1 (head to head)	NC_000023.11:46545490-46548475[+]	2986	_	0.170426	0.337558	0.517237	Genic
283194	lncRNA	LOC283194	uncharacterized LOC283194	NC_000011.10:58933643-59058452[-]	124810	_	0.631147	0.57956	0.465514	Genic
100129617	lncRNA	LOC100129617	uncharacterized LOC100129617	NC_000016.10:81665354-81667276[+]	1923	_	0.277502	0.413235	0.545213	Genic
101730217	lncRNA	SPECC1L-ADORA2A	SPECC1L-ADORA2A readthrough (NMD candidate)	NC_000022.11:24270817-24442360[+]	171544	_	0.593533	0.338714	0.399347	Genic
105370624	lncRNA	LOC105370624	#N/A	NC_000014.9:91378640-91401227[-]	22588	_	0.556999	0.520116	1.21382	Genic
101929423	lncRNA	MEF2C-AS1	MEF2C antisense RNA 1	NC_000005.10:88883330-89467581[+]	584252	_	0.96634	0.793421	0.706723	Genic
112268272	lncRNA	LOC112268272	#N/A	NC_000001.11:148840556-148883681[-]	43126	_	0.118697	0.064251	0.0748332	Genic
105378620	lncRNA	LOC105378620	#N/A	NC_000001.11:30743790-30752878[-]	9089	_	0.215624	0.479897	0.672442	Genic
105376214	lncRNA	LOC105376214	#N/A	NC_000009.12:108048170-108444724[-]	396555	_	0.655708	0.373747	0.31975	Intergenic
100508120	lncRNA	GMDS-AS1	GMDS antisense RNA 1 (head to head)	NC_000006.12:2245753-2413591[+]	167839	_	0.0708159	0.0309682	0.0362891	Genic
101927636	lncRNA	LOC101927636	uncharacterized LOC101927636	NC_000004.12:143912331-143982454[+]	70124	_	0.86237	0.418767	0.472344	Intergenic
105376090	lncRNA	LOC105376090	#N/A	NC_000009.12:75151611-75179773[+]	28163	_	0.283848	0.066152	0.0903271	Intergenic
401074	lncRNA	LINC00960	long intergenic non-protein coding RNA 960	NC_000003.12:75672281-75679303[+]	7023	_	0.0353185	0.0727168	0.168737	Intergenic
107986788	lncRNA	LOC107986788	#N/A	NC_000007.14:41732579-41872347[+]	139769	_	1.02947	0.699239	0.517922	Genic
646719	lncRNA	NIPBL-AS1	NIPBL antisense RNA 1 (head to head)	NC_000005.10:36871361-36876694[-]	5334	_	0.462456	0.272361	0.465399	Genic
101926907	lncRNA	LOC101926907	#N/A	NC_000001.11:58808920-58816042[+]	7123	_	0.0313294	0.0060164	0.00199317	Genic
107987057	lncRNA	LOC107987057	#N/A	NC_000009.12:27535367-27544144[-]	8778	_	0.116705	0.0169001	0.0267214	Genic
3653	lncRNA	IPW	imprinted in Prader-Willi syndrome (non-protein coding)	NC_000015.10:25116545-25122476[+]	5932	_	0.107014	0.0552177	0.0697828	Genic
5820	lncRNA	PVT1	Pvt1 oncogene (non-protein coding)	NC_000008.11:127794533-128101253[+]	306721	_	0.122752	0.0628103	0.104578	Genic
7955	lncRNA	RNF217-AS1	RNF217 antisense RNA 1 (head to head)	NC_000006.12:124908243-124963027[-]	54785	_	0.0318241	0.00646218	0.00256266	Genic
8420	lncRNA	SNHG3	small nucleolar RNA host gene 3	NC_000001.11:28505943-28510892[+]	4950	_	0.311163	0.643162	0.785242	Genic
8552	lncRNA	INE1	inactivation escape 1 (non-protein coding)	NC_000023.11:47204848-47205861[+]	1014	_	0.161415	0.14632	0.149585	Genic
8847	lncRNA	DLEU2	deleted in lymphocytic leukemia 2 (non-protein coding)	NC_000013.11:49982549-50125541[-]	142993	_	2.8574	2.67356	5.39657	Genic
9834	lncRNA	FAM30A	family with sequence similarity 30 member A	NC_000014.9:105917979-105932642[+]	14664	_	0.192943	0.101625	0.167163	Genic
10230	lncRNA	NBR2	neighbor of BRCA1 gene 2 (non-protein coding)	NC_000017.11:43125557-43153671[+]	28115	_	0.327088	0.155238	0.3246	Genic
10301	lncRNA	DLEU1	deleted in lymphocytic leukemia 1 (non-protein coding)	NC_000013.11:50082169-50528643[+]	446475	_	0.612463	0.597012	0.854166	Genic
10740	lncRNA	RFPL1S	RFPL1 antisense RNA 1	NC_000022.11:29437015-29442129[-]	5115	_	0.00748513	0.00394628	0.00560616	Genic
10866	lncRNA	HCP5	HLA complex P5 (non-protein coding)	NC_000006.12:31463180-31465809[+]	2630	_	0.860055	0.725466	0.696621	Genic
10984	lncRNA	KCNQ1OT1	KCNQ1 opposite strand/antisense transcript 1 (non-protein coding)	NC_000011.10:2608328-2699998[-]	91671	_	0.0070325	0.00316607	0.00453574	Genic
255031	lncRNA	LINC00957	long intergenic non-protein coding RNA 957	NC_000007.14:44039049-44044296[+]	5248	_	0.0525338	0.0044157	0.012815	Intergenic
25786	lncRNA	DGCR11	DiGeorge syndrome critical region gene 11 (non-protein coding)	NC_000022.11:19046162-19048375[-]	2214	_	0.112874	0.086631	0.201844	Genic
25845	lncRNA	PP7080	uncharacterized LOC25845	NC_000005.10:470510-472965[-]	2456	_	0.0579844	0.0270007	0.0375077	Genic
27099	lncRNA	SND1-IT1	SND1 intronic transcript 1	NC_000007.14:127997509-128000077[+]	2569	_	0.21155	0.130443	0.189892	Genic
29065	lncRNA	ASAP1-IT1	ASAP1 intronic transcript 1	NC_000008.11:130295355-130296533[-]	1179	_	0.13784	0.106431	0.315988	Genic
400946	lncRNA	LINC00954	long intergenic non-protein coding RNA 954	NC_000002.12:19868854-19885047[+]	16194	_	0.0303091	0.00901275	0.00983933	Intergenic
54067	lncRNA	C21orf62-AS1	C21orf62 antisense RNA 1	NC_000021.9:32772100-32797707[+]	25608	_	0.0715497	0.0190546	0.0596023	Genic
54553	lncRNA	MIR4453HG	MIR4453 host gene	NC_000004.12:152536264-152539263[+]	3000	_	0.111352	0.0467929	0.0866203	Genic
55000	lncRNA	TUG1	taurine up-regulated 1 (non-protein coding)	NC_000022.11:30969211-30979395[+]	10185	_	2.98253	2.34506	3.65523	Genic
55056	lncRNA	GABPB1-IT1	GABPB1 intronic transcript	NC_000015.10:50348936-50354879[-]	5944	_	0.417934	0.608372	0.669325	Genic
57061	lncRNA	HYMAI	hydatidiform mole associated and imprinted (non-protein coding)	NC_000006.12:144004916-144008730[-]	3815	_	0.036407	0.0417842	0.0955785	Genic
57212	lncRNA	TP73-AS1	TP73 antisense RNA 1	NC_000001.11:3735984-3747373[-]	11390	_	0.0433059	0.028441	0.0418581	Genic
92973	lncRNA	LINC00950	long intergenic non-protein coding RNA 950	NC_000009.12:35860274-35865518[+]	5245	_	0.00353312	0.00158705	0.00142727	Intergenic
57653	lncRNA	LOC100499484-C9ORF174	LOC100499484-C9orf174 readthrough	NC_000009.12:97238426-97377295[+]	138870	_	0.0264434	0.00457972	0.0148843	Genic
60674	lncRNA	GAS5	growth arrest specific 5 (non-protein coding)	NC_000001.11:173863899-173868882[-]	4984	_	7.38288	5.52508	5.76618	Genic
64595	lncRNA	TTTY15	testis-specific transcript, Y-linked 15 (non-protein coding)	NC_000024.10:12662367-12692224[+]	29858	_	0.181189	0.0431605	0.297852	Genic
79104	lncRNA	MEG8	maternally expressed 8, small nucleolar RNA host gene	NC_000014.9:100889649-100999113[+]	109465	_	0.0951074	0.0878503	0.0863104	Genic
79667	lncRNA	KLF3-AS1	KLF3 antisense RNA 1	NC_000004.12:38612701-38664628[-]	51928	_	0.02235	0.0124153	0.00936036	Genic
387895	lncRNA	LINC00944	long intergenic non-protein coding RNA 944	NC_000012.12:126730701-126772262[-]	41562	_	0.00879225	0	0.00137476	Intergenic
79857	lncRNA	FLJ13224	uncharacterized LOC79857	NC_000012.12:31324316-31325945[+]	1630	_	0.0117786	0.0168983	0.010247	Genic
79992	lncRNA	AGPAT4-IT1	AGPAT4 intronic transcript 1	NC_000006.12:161160114-161161982[-]	1869	_	0.0753423	0.0380125	0.0523054	Genic
80035	lncRNA	ANP32A-IT1	ANP32A intronic transcript 1	NC_000015.10:68803821-68807101[-]	3281	_	0.274462	0.161238	0.273898	Genic
80094	lncRNA	BIN3-IT1	BIN3 intronic transcript 1	NC_000008.11:22640371-22642209[-]	1839	_	0.0827864	0.123921	0.152027	Genic
80215	lncRNA	RUNX1-IT1	RUNX1 intronic transcript 1	NC_000021.9:35037925-35039426[-]	1502	_	0.284009	0.159174	0.356242	Genic
81571	lncRNA	MIR600HG	MIR600 host gene	NC_000009.12:123109494-123115477[-]	5984	_	0.0600295	0.0228626	0.0317822	Genic
400027	lncRNA	LINC00938	long intergenic non-protein coding RNA 938	NC_000012.12:45725720-45727921[-]	2202	_	2.12306	1.97016	3.18291	Intergenic
83869	lncRNA	TTTY14	testis-specific transcript, Y-linked 14 (non-protein coding)	NC_000024.10:18872501-19077547[-]	205047	_	0.0997726	0.0257207	0.0712784	Genic
389634	lncRNA	LINC00937	long intergenic non-protein coding RNA 937	NC_000012.12:8356963-8390752[-]	33790	_	0.0515283	0.0308263	0.0684055	Intergenic
100506874	lncRNA	LINC00933	long intergenic non-protein coding RNA 933	NC_000015.10:84570649-84580181[+]	9533	_	0.010816	0.00323815	0.0122444	Intergenic
84777	lncRNA	DLGAP1-AS2	DLGAP1 antisense RNA 2	NC_000018.10:3603737-3610089[+]	6353	_	0.101052	0.0299528	0.0933388	Genic
84793	lncRNA	FOXD2-AS1	FOXD2 adjacent opposite strand RNA 1	NC_000001.11:47432133-47434641[-]	2509	_	0.118499	0.0604407	0.100976	Genic
84815	lncRNA	MGC12916	uncharacterized protein MGC12916	NC_000017.11:14303740-14305745[+]	2006	_	0.050641	0.0701175	0.121183	Genic
84837	lncRNA	ARHGAP5-AS1	ARHGAP5 antisense RNA 1 (head to head)	NC_000014.9:32075419-32076699[-]	1281	_	0.195015	0.123954	0.179082	Genic
84973	lncRNA	SNHG7	small nucleolar RNA host gene 7	NC_000009.12:136724594-136728184[-]	3591	_	1.0333	0.819982	1.0749	Genic
84989	lncRNA	JMJD1C-AS1	JMJD1C antisense RNA 1	NC_000010.11:63465229-63466563[+]	1335	_	0.023113	0.0126724	0.0242836	Genic
84996	lncRNA	URB1-AS1	URB1 antisense RNA 1 (head to head)	NC_000021.9:32393133-32393960[+]	828	_	0.0582765	0.0325033	0.0591289	Genic
85371	lncRNA	KIAA1656	KIAA1656 protein	NC_000022.11:30368811-30377905[-]	9095	_	0.0038795	0.0158444	0.0153408	Genic
90024	lncRNA	FLJ20021	uncharacterized LOC90024	NC_000004.12:101347777-101348883[+]	1107	_	0.0865688	0.0373011	0.0319254	Genic
92070	lncRNA	CTBP1-AS2	CTBP1 antisense RNA 2 (head to head)	NC_000004.12:1249440-1253007[+]	3568	_	0.186924	0.131314	0.150416	Genic
283761	lncRNA	LINC00928	long intergenic non-protein coding RNA 928	NC_000015.10:89504930-89524034[-]	19105	_	0	0	0.000121568	Intergenic
93653	lncRNA	ST7-AS1	ST7 antisense RNA 1	NC_000007.14:116952446-116954334[-]	1889	_	0.213629	0.254082	0.219973	Genic
93654	lncRNA	ST7-AS2	ST7 antisense RNA 2	NC_000007.14:117072072-117145592[-]	73521	_	0.0174043	0.0232576	0.012561	Genic
112597	lncRNA	CYTOR	cytoskeleton regulator RNA	NC_000002.12:87455427-87521518[+]	66092	_	32.0197	23.7637	43.1716	Genic
114224	lncRNA	LOC114224	#N/A	NC_000009.12:34186108-34188194[+]	2087	_	0.336688	0.606036	0.70983	Genic
114915	lncRNA	EPB41L4A-AS1	EPB41L4A antisense RNA 1	NC_000005.10:112160526-112162501[+]	1976	_	0.607615	0.702733	0.845249	Genic
115110	lncRNA	TNFRSF14-AS1	TNFRSF14 antisense RNA 1	NC_000001.11:2549920-2557011[-]	7092	_	0.00966362	0.00508253	0.00766889	Genic
116828	lncRNA	N4BP2L2-IT2	N4BPL2 intronic transcript 2	NC_000013.11:32504506-32509395[-]	4890	_	0.334686	0.181368	0.20082	Genic
125144	lncRNA	LRRC75A-AS1	LRRC75A antisense RNA 1	NC_000017.11:16438987-16470648[+]	31662	_	8.90179	6.5848	9.12144	Genic
128439	lncRNA	SNHG11	small nucleolar RNA host gene 11	NC_000020.11:38446654-38450921[+]	4268	_	0.102429	0.0809257	0.167573	Genic
129790	lncRNA	C7orf13	chromosome 7 open reading frame 13	NC_000007.14:156638366-156640654[-]	2289	_	0.138338	0.159234	0.120392	Genic
145474	lncRNA	LOC145474	uncharacterized LOC145474	NC_000014.9:71487861-71489714[+]	1854	_	0.169546	0.30839	0.390434	Genic
145783	lncRNA	LOC145783	uncharacterized LOC145783	NC_000015.10:56886170-56918499[-]	32330	_	0.0226495	0.0192371	0.0461785	Genic
283663	lncRNA	LINC00926	long intergenic non-protein coding RNA 926	NC_000015.10:57300365-57307769[+]	7405	_	0.975232	0.582536	0.569341	Intergenic
147727	lncRNA	ILF3-AS1	ILF3 antisense RNA 1 (head to head)	NC_000019.10:10651862-10653872[-]	2011	_	0.441695	0.425012	0.567344	Genic
148413	lncRNA	LOC148413	uncharacterized LOC148413	NC_000001.11:1399530-1402046[+]	2517	_	0.130863	0.04464	0.0888493	Genic
91948	lncRNA	LINC00923	long intergenic non-protein coding RNA 923	NC_000015.10:97742616-97874429[-]	131814	_	0	0	0.00461741	Intergenic
150381	lncRNA	PRR34-AS1	PRR34 antisense RNA 1	NC_000022.11:46053846-46058522[+]	4677	_	0.208077	0.0837238	0.175674	Genic
150384	lncRNA	GTSE1-AS1	GTSE1 antisense RNA 1 (head to head)	NC_000022.11:46295143-46296660[-]	1518	_	0.0317929	0.011645	0.00970106	Genic
283876	lncRNA	LINC00921	long intergenic non-protein coding RNA 921	NC_000016.10:3263768-3267567[+]	3800	_	0.147954	0.0489629	0.096295	Intergenic
100505865	lncRNA	LINC00920	long intergenic non-protein coding RNA 920	NC_000016.10:66408524-66410901[+]	2378	_	0	0	0.00087583	Intergenic
151534	lncRNA	LBX2-AS1	LBX2 antisense RNA 1	NC_000002.12:74502593-74505065[+]	2473	_	0.071247	0.026241	0.0380466	Genic
152048	lncRNA	LOC152048	uncharacterized FLJ31715	NC_000003.12:37241791-37244195[-]	2405	_	0.00487663	0.00955155	0.0127981	Genic
153684	lncRNA	LOC153684	uncharacterized LOC153684	NC_000005.10:43042134-43045268[+]	3135	_	0.165862	0.0932436	0.0768358	Intergenic
158960	lncRNA	CH17-340M24.3	uncharacterized protein BC009467	NC_000023.11:154424380-154428479[-]	4100	_	0.190691	0.0281128	0.150012	Intergenic
200058	lncRNA	FLJ23867	uncharacterized protein FLJ23867	NC_000001.11:180198009-180200725[+]	2717	_	0.0398003	0.0364949	0.0643561	Genic
100188953	lncRNA	LINC00092	long intergenic non-protein coding RNA 92	NC_000009.12:96019732-96021811[-]	2080	_	0.00413125	0.00573912	0.00289174	Intergenic
100130581	lncRNA	LINC00910	long intergenic non-protein coding RNA 910	NC_000017.11:43369845-43388898[-]	19054	_	0.0173981	0.00341413	0.00684677	Intergenic
202020	lncRNA	TAPT1-AS1	TAPT1 antisense RNA 1 (head to head)	NC_000004.12:16226663-16258187[+]	31525	_	0.0530044	0.0159781	0.0158004	Genic
202781	lncRNA	PAXIP1-AS1	PAXIP1 antisense RNA 1 (head to head)	NC_000007.14:155003433-155005703[+]	2271	_	0.176487	0.0990424	0.128733	Genic
400657	lncRNA	LINC00909	long intergenic non-protein coding RNA 909	NC_000018.10:74591774-74597835[-]	6062	_	0.09798	0.0459554	0.0580727	Intergenic
284260	lncRNA	LINC00907	long intergenic non-protein coding RNA 907	NC_000018.10:42186668-42691426[+]	504759	_	0.00803237	0.00119617	0	Intergenic
203429	lncRNA	FAM226A	family with sequence similarity 226 member A (non-protein coding)	NC_000023.11:72941728-72943750[-]	2023	_	0.045099	0.0213273	0.0247644	Genic
219347	lncRNA	TMEM254-AS1	TMEM254 antisense RNA 1	NC_000010.11:80046233-80079193[-]	32961	_	0.0214503	0.00329867	0.00386416	Genic
220906	lncRNA	WAC-AS1	WAC antisense RNA 1 (head to head)	NC_000010.11:28519917-28532354[-]	12438	_	0.323088	0.299182	0.49207	Genic
220930	lncRNA	ZEB1-AS1	ZEB1 antisense RNA 1	NC_000010.11:31307717-31320447[-]	12731	_	0.0718371	0.0242646	0.0316908	Genic
253018	lncRNA	HCG27	HLA complex group 27 (non-protein coding)	NC_000006.12:31197760-31203968[+]	6209	_	0.265584	0.19894	0.249582	Genic
254100	lncRNA	SSSCA1-AS1	SSSCA1 antisense RNA 1 (head to head)	NC_000011.10:65569220-65570413[-]	1194	_	0.0517136	0.0324674	0.059685	Genic
254128	lncRNA	NIFK-AS1	NIFK antisense RNA 1	NC_000002.12:121649654-121728560[+]	78907	_	0.354113	0.210054	0.312748	Genic
254559	lncRNA	MIR9-3HG	MIR9-3 host gene	NC_000015.10:89361579-89398487[+]	36909	_	0.0211816	0.00827798	0.0101553	Genic
254896	lncRNA	LOC254896	uncharacterized LOC254896	NC_000008.11:23084355-23103558[+]	19204	_	0.101797	0.0500877	0.195863	Genic
255512	lncRNA	TOLLIP-AS1	TOLLIP antisense RNA 1 (head to head)	NC_000011.10:1309708-1310707[+]	1000	_	0.470112	0.53127	0.592687	Genic
283143	lncRNA	LINC00900	long intergenic non-protein coding RNA 900	NC_000011.10:115755331-115760200[-]	4870	_	0.0123131	0.0194528	0.0423329	Intergenic
283028	lncRNA	LOC283028	uncharacterized LOC283028	NC_000010.11:42751184-42755203[-]	4020	_	0.614849	0.387167	0.599173	Intergenic
283120	lncRNA	H19	H19, imprinted maternally expressed transcript (non-protein coding)	NC_000011.10:1995176-2001466[-]	6291	_	0.266086	0.160169	0.143086	Genic
283131	lncRNA	NEAT1	nuclear paraspeckle assembly transcript 1 (non-protein coding)	NC_000011.10:65422798-65445540[+]	22743	_	22.6263	18.697	44.8148	Genic
100271722	lncRNA	LINC00899	long intergenic non-protein coding RNA 899	NC_000022.11:46039907-46044868[-]	4962	_	0.0428323	0.0342119	0.0144595	Intergenic
283174	lncRNA	MIR4697HG	MIR4697 host gene	NC_000011.10:133896435-133901740[-]	5306	_	0.0202944	0.0168698	0.0122673	Genic
150197	lncRNA	LINC00896	long intergenic non-protein coding RNA 896	NC_000022.11:20206332-20208537[+]	2206	_	0.00838063	0.00160735	0.0022798	Intergenic
283314	lncRNA	C1RL-AS1	C1RL antisense RNA 1	NC_000012.12:7108308-7121851[+]	13544	_	0.0459725	0.0183899	0.0385251	Genic
100272228	lncRNA	LINC00894	long intergenic non-protein coding RNA 894	NC_000023.11:149938548-150016787[+]	78240	_	0.0657905	0.0197399	0.0260686	Intergenic
283596	lncRNA	SNHG10	small nucleolar RNA host gene 10	NC_000014.9:95532912-95534872[-]	1961	_	0.163905	0.0992812	0.170101	Genic
100131434	lncRNA	LINC00893	long intergenic non-protein coding RNA 893	NC_000023.11:149527591-149539752[-]	12162	_	0.0998686	0.0650231	0.10718	Intergenic
100128420	lncRNA	LINC00892	long intergenic non-protein coding RNA 892	NC_000023.11:136639543-136642429[+]	2887	_	1.01885	0.661389	1.35925	Intergenic
283687	lncRNA	ST20-AS1	ST20 antisense RNA 1	NC_000015.10:79922771-79924854[+]	2084	_	0.0968228	0.0762046	0.154407	Genic
441501	lncRNA	LINC00891	long intergenic non-protein coding RNA 891	NC_000023.11:71697196-71703406[+]	6211	_	0	0.00303633	0.00198375	Intergenic
283932	lncRNA	FBXL19-AS1	FBXL19 antisense RNA 1 (head to head)	NC_000016.10:30919319-30923269[-]	3951	_	0.0266239	0.0152029	0.0265609	Genic
158696	lncRNA	LINC00889	long intergenic non-protein coding RNA 889	NC_000023.11:138614731-138617638[-]	2908	_	0.00120587	0	0	Intergenic
284385	lncRNA	ZNF561-AS1	ZNF561 antisense RNA 1 (head to head)	NC_000019.10:9621482-9634862[+]	13381	_	0.0524494	0.0135348	0.0344038	Genic
100505687	lncRNA	LINC00888	long intergenic non-protein coding RNA 888	NC_000003.12:183447608-183456013[+]	8406	_	0.0932373	0.095271	0.229771	Intergenic
284454	lncRNA	LOC284454	uncharacterized LOC284454	NC_000019.10:13834516-13836289[-]	1774	_	1.28364	2.80341	3.20618	Genic
730091	lncRNA	LINC00886	long intergenic non-protein coding RNA 886	NC_000003.12:156747343-156817062[-]	69720	_	0.00617162	0.00530313	0.00500522	Intergenic
284677	lncRNA	SNHG28	small nucleolar RNA host gene 28	NC_000001.11:159834478-159855037[-]	20560	_	0.018756	0.00911825	0.00903014	Genic
401106	lncRNA	LINC00884	long intergenic non-protein coding RNA 884	NC_000003.12:194487140-194488545[+]	1406	_	0	0.000698367	0	Intergenic
285286	lncRNA	LINC00877	long intergenic non-protein coding RNA 877	NC_000003.12:72035519-72100455[-]	64937	_	0.117664	0.0279141	0.0437437	Intergenic
284757	lncRNA	MIR646HG	MIR646 host gene	NC_000020.11:60138492-60322256[+]	183765	_	0.13393	0.086797	0.14797	Genic
284837	lncRNA	AATBC	apoptosis associated transcript in bladder cancer	NC_000021.9:43805758-43812567[-]	6810	_	0.11153	0.0403782	0.0233494	Genic
284900	lncRNA	TTC28-AS1	TTC28 antisense RNA 1	NC_000022.11:27919376-28002679[+]	83304	_	1.20049	1.33016	1.56948	Genic
285033	lncRNA	STARD7-AS1	STARD7 antisense RNA 1	NC_000002.12:96208416-96242623[+]	34208	_	0.0732439	0.0437561	0.0643333	Genic
285097	lncRNA	LOC285097	uncharacterized FLJ38379	NC_000002.12:242001209-242006013[+]	4805	_	0.022189	0.0122492	0.0104162	Genic
57234	lncRNA	LINC00869	long intergenic non-protein coding RNA 869	NC_000001.11:149607012-149679523[+]	72512	_	0.818747	0.583532	0.811142	Intergenic
285352	lncRNA	KIF9-AS1	KIF9 antisense RNA 1	NC_000003.12:47164370-47244116[+]	79747	_	0.0988124	0.0976755	0.0907328	Genic
285505	lncRNA	FAM198B-AS1	FAM198B antisense RNA 1	NC_000004.12:158170752-158202877[+]	32126	_	0.119477	0.103785	0.0742334	Genic
285512	lncRNA	FAM13A-AS1	FAM13A antisense RNA 1	NC_000004.12:88709789-88730103[+]	20315	_	0.370451	0.146355	0.273818	Genic
285540	lncRNA	SEPSECS-AS1	SEPSECS antisense RNA 1 (head to head)	NC_000004.12:25160672-25198506[+]	37835	_	0.410441	0.287035	0.225091	Genic
285638	lncRNA	LOC285638	uncharacterized LOC285638	NC_000005.10:109237134-109326369[-]	89236	_	0.14077	0.035511	0.0512618	Intergenic
285780	lncRNA	LY86-AS1	LY86 antisense RNA 1	NC_000006.12:6346465-6622826[-]	276362	_	0.591263	0.453281	0.226223	Genic
285830	lncRNA	HLA-F-AS1	HLA-F antisense RNA 1	NC_000006.12:29726601-29749049[-]	22449	_	0.0397556	0.0204218	0.0359917	Genic
643529	lncRNA	LINC00865	long intergenic non-protein coding RNA 865	NC_000010.11:89829493-89840861[+]	11369	_	0.010931	0.00496053	0.00269847	Intergenic
285954	lncRNA	INHBA-AS1	INHBA antisense RNA 1	NC_000007.14:41693919-41779378[+]	85460	_	0.10326	0.0444739	0.057006	Genic
285965	lncRNA	EPHA1-AS1	EPHA1 antisense RNA 1	NC_000007.14:143407813-143523449[+]	115637	_	0.039073	0.0302487	0.0442428	Genic
286333	lncRNA	FAM225A	family with sequence similarity 225 member A (non-protein coding)	NC_000009.12:113112896-113119846[+]	6951	_	0.00379588	0.0276568	0.0175096	Genic
286437	lncRNA	LOC286437	uncharacterized LOC286437	NC_000023.11:104122305-104124632[-]	2328	_	0.194461	0.0889221	0.132498	Genic
286967	lncRNA	FAM223B	family with sequence similarity 223 member B (non-protein coding)	NC_000023.11:154632470-154633182[-]	713	_	0.149619	0.0788785	0.13703	Genic
317751	lncRNA	MESTIT1	MEST intronic transcript 1, antisense RNA	NC_000007.14:130487057-130491172[-]	4116	_	0.0678869	0.0133344	0.021163	Genic
338758	lncRNA	ATP2B1-AS1	ATP2B1 antisense RNA 1	NC_000012.12:89708955-89711952[+]	2998	_	0.103005	0.249322	0.21601	Genic
728218	lncRNA	LINC00864	long intergenic non-protein coding RNA 864	NC_000010.11:87396574-87407700[-]	11127	_	0	0	0.00124538	Intergenic
439994	lncRNA	LINC00863	long intergenic non-protein coding RNA 863	NC_000010.11:87342411-87357302[+]	14892	_	0.628906	0.551388	0.708087	Intergenic
554279	lncRNA	LINC00862	long intergenic non-protein coding RNA 862	NC_000001.11:200342544-200373792[-]	31249	_	0	0	0.0159569	Intergenic
339803	lncRNA	LOC339803	uncharacterized LOC339803	NC_000002.12:61141592-61144975[-]	3384	_	0.072523	0.042397	0.069959	Intergenic
339929	lncRNA	LPP-AS2	LPP antisense RNA 2	NC_000003.12:188151206-188154088[-]	2883	_	0.01317	0.0452833	0.0286239	Genic
344595	lncRNA	DUBR	DPPA2 upstream binding RNA	NC_000003.12:107240692-107326964[+]	86273	_	0.192315	0.188469	0.249811	Genic
100132987	lncRNA	LINC00856	long intergenic non-protein coding RNA 856	NC_000010.11:78248625-78252645[+]	4021	_	0	0.000709733	0.00183942	Intergenic
352961	lncRNA	HCG26	HLA complex group 26 (non-protein coding)	NC_000006.12:31471229-31472408[+]	1180	_	0.310901	0.239925	0.297969	Genic
359809	lncRNA	PEG13	paternally expressed 13	NC_000008.11:140094894-140100535[-]	5642	_	0.0646386	0.0342531	0.0370644	Genic
374987	lncRNA	NEXN-AS1	NEXN antisense RNA 1	NC_000001.11:77881348-77889539[-]	8192	_	0.389956	0.201353	0.299844	Genic
100874253	lncRNA	LINC00853	long intergenic non-protein coding RNA 853	NC_000001.11:47179250-47180339[+]	1090	_	7.31012	6.48151	9.52885	Intergenic
378938	lncRNA	MALAT1	metastasis associated lung adenocarcinoma transcript 1 (non-protein coding)	NC_000011.10:65497738-65506516[+]	8779	_	162.627	158.181	227.421	Genic
386593	lncRNA	CHKB-CPT1B	CHKB-CPT1B readthrough (NMD candidate)	NC_000022.11:50568861-50582999[-]	14139	_	0	0.061237	0.065737	Genic
386607	lncRNA	ZFP91-CNTF	ZFP91-CNTF readthrough (NMD candidate)	NC_000011.10:58579114-58625733[+]	46620	_	0.03368	0.0113525	0.0391553	Genic
386758	lncRNA	ZNF582-AS1	ZNF582 antisense RNA 1 (head to head)	NC_000019.10:56393676-56399175[+]	5500	_	0.0860847	0.0535505	0.0235723	Genic
387066	lncRNA	SNHG5	small nucleolar RNA host gene 5	NC_000006.12:85677007-85678733[-]	1727	_	12.0589	15.8436	27.6444	Genic
84657	lncRNA	LINC00852	long intergenic non-protein coding RNA 852	NC_000003.12:10284419-10285746[+]	1328	_	0.247203	0.168485	0.215465	Intergenic
388572	lncRNA	LOC388572	#N/A	NC_000011.10:159894-189352[-]	29459	_	0.0854301	0.0376192	0.146242	Genic
388796	lncRNA	SNHG17	small nucleolar RNA host gene 17	NC_000020.11:38420588-38435377[-]	14790	_	0.366697	0.437752	1.59008	Genic
389641	lncRNA	LOC389641	uncharacterized LOC389641	NC_000008.11:23225221-23230926[+]	5706	_	0.0841074	0.0309508	0.0550994	Intergenic
389741	lncRNA	GLIDR	glioblastoma down-regulated RNA	NC_000009.12:39803496-39810159[-]	6664	_	0.0366073	0.0145756	0.0166863	Genic
399715	lncRNA	LOC399715	uncharacterized LOC399715	NC_000010.11:6326544-6335982[+]	9439	_	0.0205115	0.0224153	0.115745	Genic
399716	lncRNA	LOC399716	uncharacterized LOC399716	NC_000010.11:6350316-6353808[+]	3493	_	0.0359333	0.046972	0.112516	Intergenic
729678	lncRNA	LINC00847	long intergenic non-protein coding RNA 847	NC_000005.10:180830957-180835726[+]	4770	_	0.191513	0.110032	0.10236	Intergenic
399972	lncRNA	GSEC	G-quadruplex forming sequence containing lncRNA	NC_000011.10:126341716-126355587[-]	13872	_	0.149004	0.123196	0.103924	Genic
399975	lncRNA	LOC399975	uncharacterized LOC399975	NC_000011.10:129233778-129283164[-]	49387	_	0.646732	0.513713	1.12887	Genic
100506835	lncRNA	LINC00840	long intergenic non-protein coding RNA 840	NC_000010.11:43859411-43895433[+]	36023	_	0	0.00168063	0	Intergenic
84856	lncRNA	LINC00839	long intergenic non-protein coding RNA 839	NC_000010.11:42475491-42495337[+]	19847	_	0	0	0.000546068	Intergenic
400508	lncRNA	CRYM-AS1	CRYM antisense RNA 1	NC_000016.10:21300849-21318591[+]	17743	_	0.117054	0.0399167	0.0443274	Genic
400617	lncRNA	KCNJ2-AS1	KCNJ2 antisense RNA 1 (head to head)	NC_000017.11:70166961-70169402[-]	2442	_	0.00734925	0.00978595	0.0227488	Genic
100507605	lncRNA	LINC00837	long intergenic non-protein coding RNA 837	NC_000010.11:28789311-28796050[-]	6740	_	0	0	0.000419773	Intergenic
400798	lncRNA	C1orf220	chromosome 1 open reading frame 220 (putative)	NC_000001.11:178542796-178548889[+]	6094	_	0.0491382	0.00580967	0.00490173	Genic
100128378	lncRNA	LINC00696	long intergenic non-protein coding RNA 696	NC_000003.12:52062094-52065112[-]	3019	_	0.001524	0	0.000174977	Intergenic
400960	lncRNA	PCBP1-AS1	PCBP1 antisense RNA 1	NC_000002.12:69962263-70087015[-]	124753	_	0.0468815	0.00719267	0.0134304	Genic
152024	lncRNA	LINC00691	long intergenic non-protein coding RNA 691	NC_000003.12:24099974-24103247[-]	3274	_	0	0	0.000176523	Intergenic
401105	lncRNA	FLJ42393	uncharacterized LOC401105	NC_000003.12:188178543-188180808[+]	2266	_	0.0612183	0.0249698	0.0664322	Genic
106660612	lncRNA	LINC00680	long intergenic non-protein coding RNA 680	NC_000006.12:57945834-57961446[-]	15613	_	0.0414181	0.0139113	0.0262659	Intergenic
101410541	lncRNA	LINC00678	long intergenic non-protein coding RNA 678	NC_000011.10:27617626-27634627[-]	17002	_	0	0	0.000510023	Intergenic
401237	lncRNA	CASC15	cancer susceptibility 15 (non-protein coding)	NC_000006.12:21666413-22195820[+]	529408	_	0.224442	0.196925	0.497306	Genic
105370683	lncRNA	LINC00677	long intergenic non-protein coding RNA 677	NC_000014.9:103120849-103122909[-]	2061	_	0	0	0.00101368	Intergenic
401261	lncRNA	LOC401261	uncharacterized LOC401261	NC_000006.12:42783496-42791323[+]	7828	_	0.288941	0.226338	0.277796	Genic
401264	lncRNA	TRAM2-AS1	TRAM2 antisense RNA 1 (head to head)	NC_000006.12:52577202-52583993[+]	6792	_	0.200113	0.144505	0.348021	Genic
401320	lncRNA	LOC401320	uncharacterized LOC401320	NC_000007.14:30548357-30577779[-]	29423	_	0.715891	0.497814	0.641651	Intergenic
401398	lncRNA	POT1-AS1	POT1 antisense RNA 1	NC_000007.14:124929873-125145234[+]	215362	_	0.113328	0.0354047	0.0763916	Genic
401472	lncRNA	GASAL1	growth arrest associated lncRNA 1	NC_000008.11:102806822-102811214[+]	4393	_	0.0230307	0.0151332	0.0164818	Genic
100499466	lncRNA	LINC00674	long intergenic non-protein coding RNA 674	NC_000017.11:68101555-68135929[+]	34375	_	4.23706	3.73498	17.2408	Intergenic
403323	lncRNA	LOC403323	uncharacterized LOC403323	NC_000009.12:62857856-62898087[-]	40232	_	0.0405776	0.0249777	0.0124747	Genic
414764	lncRNA	HCG23	HLA complex group 23 (non-protein coding)	NC_000006.12:32390510-32393691[+]	3182	_	0.0207829	0.0392064	0.0344098	Genic
439949	lncRNA	PRKCQ-AS1	PRKCQ antisense RNA 1	NC_000010.11:6580425-6585361[+]	4937	_	0.482132	0.259764	0.346827	Genic
100499467	lncRNA	LINC00673	long intergenic non-protein coding RNA 673	NC_000017.11:72403322-72592804[-]	189483	_	0	0	0.000693318	Intergenic
100505576	lncRNA	LINC00672	long intergenic non-protein coding RNA 672	NC_000017.11:38925168-38929384[+]	4217	_	0.0789669	0.0390298	0.0503609	Intergenic
440288	lncRNA	UBL7-AS1	UBL7 antisense RNA 1 (head to head)	NC_000015.10:74461265-74481292[+]	20028	_	0.104186	0.0453155	0.0498397	Genic
440823	lncRNA	MIAT	myocardial infarction associated transcript (non-protein coding)	NC_000022.11:26657482-26676478[+]	18997	_	0.297026	0.163602	0.323893	Genic
440918	lncRNA	FLJ46875	uncharacterized LOC440918	NC_000002.12:156336572-156342120[-]	5549	_	0.116493	0.0597191	0.0873666	Intergenic
440944	lncRNA	THUMPD3-AS1	THUMPD3 antisense RNA 1	NC_000003.12:9385264-9397494[-]	12231	_	1.3655	1.37519	1.61661	Genic
441307	lncRNA	HRAT92	heart tissue-associated transcript 92	NC_000007.14:520391-525232[+]	4842	_	2.95368	2.0394	2.99048	Genic
497258	lncRNA	BDNF-AS	BDNF antisense RNA	NC_000011.10:27506852-27698171[+]	191320	_	0.0303688	0.0158715	0.0193354	Genic
541471	lncRNA	MIR4435-2HG	MIR4435-2 host gene	NC_000002.12:111195866-111495161[-]	299296	_	21.3226	16.5943	25.3562	Genic
550112	lncRNA	UBA6-AS1	UBA6 antisense RNA 1 (head to head)	NC_000004.12:67701278-67722505[+]	21228	_	0.110672	0.0427088	0.0580813	Genic
554203	lncRNA	JPX	JPX transcript, XIST activator (non-protein coding)	NC_000023.11:73944324-74070384[+]	126061	_	0.121885	0.0978954	0.0925753	Genic
641467	lncRNA	TSC22D1-AS1	TSC22D1 antisense RNA 1	NC_000013.11:44575896-44580432[+]	4537	_	0.0242697	0.00770203	0.00362243	Genic
641518	lncRNA	LEF1-AS1	LEF1 antisense RNA 1	NC_000004.12:108167525-108176430[+]	8906	_	0.0674711	0.0127112	0.00363181	Genic
641638	lncRNA	SNHG6	small nucleolar RNA host gene 6	NC_000008.11:66921690-66925541[-]	3852	_	28.9928	32.7009	32.2008	Genic
642361	lncRNA	LOC642361	uncharacterized LOC642361	NC_000010.11:79825902-79827602[+]	1701	_	0.367863	0.377631	0.558239	Genic
642852	lncRNA	LOC642852	uncharacterized LOC642852	NC_000021.9:45288052-45297354[+]	9303	_	0.0410114	0.0162569	0.0180861	Genic
643072	lncRNA	LOC643072	uncharacterized LOC643072	NC_000002.12:159615294-159618042[+]	2749	_	0.166238	0.0613996	0.159845	Genic
643327	lncRNA	LOC643327	uncharacterized LOC643327	NC_000006.12:3455703-3469010[+]	13308	_	2.41737	0.57881	0.882168	Genic
388387	lncRNA	LINC00671	long intergenic non-protein coding RNA 671	NC_000017.11:42874674-42898734[-]	24061	_	0.00428925	0.00779063	0.00565607	Intergenic
339290	lncRNA	LINC00667	long intergenic non-protein coding RNA 667	NC_000018.10:5238100-5246508[+]	8409	_	0.439353	0.221491	0.343269	Intergenic
643723	lncRNA	LYPLAL1-AS1	LYPLAL1 antisense RNA 1 (head to head)	NC_000001.11:219080973-219173788[-]	92816	_	3.30685	2.88535	2.63899	Genic
100506930	lncRNA	LINC00665	long intergenic non-protein coding RNA 665	NC_000019.10:36313061-36331718[-]	18658	_	0	0.00412653	0.000672511	Intergenic
400680	lncRNA	LINC00664	long intergenic non-protein coding RNA 664	NC_000019.10:21483715-21503238[+]	19524	_	0.00316962	0.00043885	0.0084453	Intergenic
643977	lncRNA	FLJ32255	uncharacterized LOC643977	NC_000005.10:42985398-42993333[-]	7936	_	4.36999	2.76198	5.14122	Intergenic
644246	lncRNA	KANSL1-AS1	KANSL1 antisense RNA 1	NC_000017.11:46193573-46196723[+]	3151	_	0.426541	0.152334	0.244668	Genic
644285	lncRNA	LOC644285	uncharacterized LOC644285	NC_000005.10:87318415-87323628[-]	5214	_	0.034929	0.0102404	0.0123891	Genic
644297	lncRNA	FAM215B	#N/A	NC_000017.11:46559526-46561589[-]	2064	_	0.0418149	0.0495829	0.0611757	Genic
644656	lncRNA	LOC644656	uncharacterized LOC644656	NC_000011.10:9459556-9460698[-]	1143	_	0.0863983	0.101257	0.0742379	Intergenic
644794	lncRNA	LOC644794	uncharacterized LOC644794	NC_000007.14:66904120-66906297[+]	2178	_	0.0654894	0.037693	0.0557112	Intergenic
645212	lncRNA	EIF3J-AS1	EIF3J antisense RNA 1 (head to head)	NC_000015.10:44534505-44536923[-]	2419	_	0.306296	0.098276	0.242685	Genic
645431	lncRNA	FUT8-AS1	FUT8 antisense RNA 1	NC_000014.9:65410592-65412617[-]	2026	_	0.392541	0.240063	0.529635	Genic
645644	lncRNA	FLJ42627	uncharacterized LOC645644	NC_000016.10:2638982-2646129[+]	7148	_	0.0410976	0.035057	0.0384977	Intergenic
284440	lncRNA	LINC00663	long intergenic non-protein coding RNA 663	NC_000019.10:19756371-19776413[-]	20043	_	0.0388575	0.00980507	0.0087722	Intergenic
646626	lncRNA	LOC646626	uncharacterized LOC646626	NC_000001.11:85276358-85278088[+]	1731	_	0.00990225	0.0426152	0.0245297	Genic
646762	lncRNA	LOC646762	uncharacterized LOC646762	NC_000007.14:29645922-29685138[-]	39217	_	0.0166474	0.0151596	0.0412939	Genic
148189	lncRNA	LINC00662	long intergenic non-protein coding RNA 662	NC_000019.10:27790493-27793940[-]	3448	_	0.013678	0.0161118	0.0187195	Intergenic
647946	lncRNA	MIR924HG	MIR924 host gene	NC_000018.10:39206924-39751995[-]	545072	_	0.0445209	0.047708	0.0626265	Genic
653160	lncRNA	LOC653160	uncharacterized LOC653160	NC_000001.11:34975699-34978706[-]	3008	_	0.0977535	0.0221034	0.0370523	Intergenic
653687	lncRNA	FAM226B	family with sequence similarity 226 member B (non-protein coding)	NC_000023.11:72777073-72779095[+]	2023	_	0.023517	0.015111	0.0265943	Genic
654433	lncRNA	PAX8-AS1	PAX8 antisense RNA 1	NC_000002.12:113235527-113267023[+]	31497	_	0.470347	0.208058	0.514641	Genic
654434	lncRNA	SNHG20	small nucleolar RNA host gene 20	NC_000017.11:77088643-77094986[+]	6344	_	0.695563	0.784294	0.949973	Genic
678655	lncRNA	CD27-AS1	CD27 antisense RNA 1	NC_000012.12:6439001-6451517[-]	12517	_	3.49174	2.75243	3.2138	Genic
728190	lncRNA	NUTM2A-AS1	NUTM2A antisense RNA 1	NC_000010.11:87238667-87342558[-]	103892	_	0.543786	0.231291	0.396132	Genic
728262	lncRNA	FAM157A	family with sequence similarity 157 member A (non-protein coding)	NC_000003.12:198153206-198222513[+]	69308	_	0.180872	0.0968165	0.278057	Genic
100652730	lncRNA	LINC00659	long intergenic non-protein coding RNA 659	NC_000020.11:62774121-62776856[-]	2736	_	0	0	0.000855943	Intergenic
149837	lncRNA	LINC00654	long intergenic non-protein coding RNA 654	NC_000020.11:5496067-5504596[-]	8530	_	0.0146952	0.00510242	0.00541276	Intergenic
728558	lncRNA	ENTPD1-AS1	ENTPD1 antisense RNA 1	NC_000010.11:95753206-96090235[-]	337030	_	0.0485171	0.0497079	0.0287112	Genic
728673	lncRNA	LOC728673	uncharacterized LOC728673	NC_000009.12:62897376-62899777[+]	2402	_	0.0379771	0.0235253	0.0183659	Intergenic
728715	lncRNA	LOC728715	ovostatin homolog 2	NC_000012.12:9397057-9407414[-]	10358	_	2.83704	1.16924	1.8832	Genic
728769	lncRNA	SCAMP1-AS1	SCAMP1 antisense RNA 1	NC_000005.10:78358764-78360541[-]	1778	_	0.110078	0.0573882	0.0890968	Genic
729013	lncRNA	ZBED5-AS1	ZBED5 antisense RNA 1	NC_000011.10:10858217-10879276[+]	21060	_	2.5274	1.99383	2.55651	Genic
729451	lncRNA	LOC729451	#N/A	NC_000014.9:54684026-54687906[-]	3881	_	7.67066	6.84614	6.14649	Genic
100506334	lncRNA	LINC00649	long intergenic non-protein coding RNA 649	NC_000021.9:33931122-33971186[+]	40065	_	0.207673	0.0524034	0.0534348	Intergenic
729683	lncRNA	LOC729683	uncharacterized LOC729683	NC_000017.11:63700338-63702685[+]	2348	_	0.12416	0.227324	0.0851397	Genic
729732	lncRNA	LOC729732	uncharacterized LOC729732	NC_000008.11:12537079-12665611[-]	128533	_	0.0173907	0.0101692	0.0118032	Genic
731075	lncRNA	LOC731075	#N/A	NC_000007.14:152100928-152133319[-]	32392	_	0.0993229	0.0573899	0.0702518	Genic
100506433	lncRNA	LINC00648	long intergenic non-protein coding RNA 648	NC_000014.9:47764953-47795014[-]	30062	_	0.00106662	0	0	Intergenic
735301	lncRNA	SNHG9	small nucleolar RNA host gene 9	NC_000016.10:1964996-1965504[+]	509	_	9.98481	7.94873	10.8665	Genic
100009676	lncRNA	ZBTB11-AS1	ZBTB11 antisense RNA 1	NC_000003.12:101676430-101679217[+]	2788	_	0.0685011	0.0386033	0.0461972	Genic
100048912	lncRNA	CDKN2B-AS1	CDKN2B antisense RNA 1	NC_000009.12:21994791-22121097[+]	126307	_	0.0217081	0.00482518	0.0113832	Genic
100093630	lncRNA	SNHG8	small nucleolar RNA host gene 8	NC_000004.12:118278762-118279823[+]	1062	_	2.92369	3.13313	3.30747	Genic
100113386	lncRNA	UCKL1-AS1	UCKL1 antisense RNA 1	NC_000020.11:63953384-63956985[+]	3602	_	0.00258175	0.00666247	0.0151292	Genic
100126793	lncRNA	GHRLOS	ghrelin opposite strand/antisense RNA	NC_000003.12:10280952-10293449[+]	12498	_	0.11982	0.138875	0.0667423	Genic
100128191	lncRNA	TMPO-AS1	TMPO antisense RNA 1	NC_000012.12:98512973-98516226[-]	3254	_	0.0464777	0.0652211	0.0640073	Genic
646113	lncRNA	LINC00643	long intergenic non-protein coding RNA 643	NC_000014.9:62117357-62134186[+]	16830	_	0	0	8.15227e-05	Intergenic
100128340	lncRNA	LOC100128340	uncharacterized LOC100128340	NC_000005.10:177939527-177959800[+]	20274	_	0.0659802	0.0487413	0.0675681	Intergenic
100128385	lncRNA	FAM225B	family with sequence similarity 225 member B (non-protein coding)	NC_000009.12:113104723-113111677[-]	6955	_	0.0055265	0.0183092	0.0113773	Genic
100128398	lncRNA	LOC100128398	uncharacterized LOC100128398	NC_000019.10:58002894-58007206[+]	4313	_	0.0937972	0.0253395	0.0574027	Genic
400238	lncRNA	LINC00642	long intergenic non-protein coding RNA 642	NC_000014.9:90455230-90458905[+]	3676	_	0.188602	0.0204768	0.0987823	Intergenic
100128537	lncRNA	MIR29B2CHG	MIR29B2 and MIR29C host gene	NC_000001.11:207801518-207822703[-]	21186	_	0.28825	0.228117	0.301615	Genic
283624	lncRNA	LINC00641	long intergenic non-protein coding RNA 641	NC_000014.9:21200079-21206900[-]	6822	_	0.545409	0.195609	0.286004	Intergenic
100129034	lncRNA	LOC100129034	uncharacterized LOC100129034	NC_000009.12:124353473-124359186[+]	5714	_	0.257683	0.168522	0.235019	Genic
100129195	lncRNA	ZSCAN16-AS1	ZSCAN16 antisense RNA 1	NC_000006.12:28121795-28137316[-]	15522	_	0.287654	0.271858	0.360285	Genic
100129196	lncRNA	MATN1-AS1	MATN1 antisense RNA 1	NC_000001.11:30718772-30726746[+]	7975	_	0.0200326	0.0436665	0.0272758	Genic
100129203	lncRNA	LOC100129203	uncharacterized LOC100129203	NC_000011.10:95230186-95234404[+]	4219	_	0.0780744	0.0274882	0.0498393	Genic
100129387	lncRNA	GABPB1-AS1	GABPB1 antisense RNA 1	NC_000015.10:50354174-50358312[+]	4139	_	0.433965	0.546695	0.66547	Genic
100129503	lncRNA	LOC100129503	#N/A	NC_000017.11:81003413-81005072[+]	1660	_	0.0291746	0.0140756	0.0110268	Intergenic
283547	lncRNA	LINC00639	long intergenic non-protein coding RNA 639	NC_000014.9:38749339-38916882[-]	167544	_	0	0.000299367	0	Intergenic
100129716	lncRNA	ARRDC3-AS1	ARRDC3 antisense RNA 1	NC_000005.10:91380347-91420715[+]	40369	_	0.240384	0.167072	0.190963	Genic
196872	lncRNA	LINC00638	long intergenic non-protein coding RNA 638	NC_000014.9:104821201-104823718[+]	2518	_	0	0.00256477	0.00163448	Intergenic
100129917	lncRNA	LOC100129917	uncharacterized LOC100129917	NC_000004.12:780149-781848[-]	1700	_	0.113647	0.0638544	0.149239	Intergenic
100129973	lncRNA	CERNA1	competing endogenous lncRNA 1 for miR-4707-5p and miR-4767	NC_000015.10:52180026-52205879[+]	25854	_	0.460664	0.416108	0.694844	Genic
100130207	lncRNA	LOC100130207	uncharacterized LOC100130207	NC_000003.12:3700814-3800875[-]	100062	_	0.0152233	0.0134981	0.00592894	Genic
100130298	lncRNA	LOC100130298	hCG1816373-like	NC_000008.11:60966121-60967748[-]	1628	_	0.0173396	0.0422468	0.218745	Genic
100130476	lncRNA	LOC100130476	uncharacterized LOC100130476	NC_000006.12:137823669-137868233[-]	44565	_	0.0492545	0.0285367	0.038041	Genic
100130557	lncRNA	NFYC-AS1	NFYC antisense RNA 1	NC_000001.11:40689080-40692261[-]	3182	_	0.121921	0.0651396	0.0733152	Genic
100130872	lncRNA	LOC100130872	uncharacterized LOC100130872	NC_000004.12:1195783-1208962[-]	13180	_	0.31693	0.182413	0.283677	Genic
100130992	lncRNA	LOC100130992	uncharacterized LOC100130992	NC_000010.11:22252072-22258548[+]	6477	_	0.0194193	0.00874075	0.0124534	Intergenic
100131089	lncRNA	SRP14-AS1	SRP14 antisense RNA1 (head to head)	NC_000015.10:40039311-40067509[+]	28199	_	0.0540275	0.01306	0.0104599	Genic
100131096	lncRNA	TNRC6C-AS1	TNRC6C antisense RNA 1	NC_000017.11:78107401-78111799[-]	4399	_	0.202873	0.132828	0.155782	Genic
100131234	lncRNA	MIR181A1HG	MIR181A1 host gene	NC_000001.11:198808003-198937429[-]	129427	_	0.108164	0.163125	0.340316	Genic
151658	lncRNA	LINC00635	long intergenic non-protein coding RNA 635	NC_000003.12:107841662-107878068[-]	36407	_	0	0	0.00294547	Intergenic
100131561	lncRNA	FKSG29	FKSG29	NC_000013.11:99351420-99352027[+]	608	_	0.0449956	0.0394834	0.0939485	Genic
100131564	lncRNA	CCDC18-AS1	CCDC18 antisense RNA 1	NC_000001.11:93310109-93345811[-]	35703	_	0.630486	0.438994	0.57692	Genic
100131733	lncRNA	USP30-AS1	USP30 antisense RNA 1	NC_000012.12:109052041-109053965[-]	1925	_	0.0770382	0.0205832	0.032334	Genic
100132062	lncRNA	LOC100132062	uncharacterized LOC100132062	NC_000005.10:181323506-181328195[+]	4690	_	0.242159	0.110271	0.249797	Genic
100132111	lncRNA	LOC100132111	uncharacterized LOC100132111	NC_000001.11:151838277-151851535[+]	13259	_	0.0199314	0.0125608	0.0123091	Genic
100132116	lncRNA	ACTA2-AS1	ACTA2 antisense RNA 1	NC_000010.11:88932684-88939974[+]	7291	_	0.0757071	0.00544188	0.00311606	Genic
100132249	lncRNA	LOC100132249	uncharacterized LOC100132249	NC_000009.12:62834248-62838346[-]	4099	_	0.0281722	0.0189632	0.0181619	Intergenic
100132287	lncRNA	LOC100132287	uncharacterized LOC100132287	NC_000001.11:490756-495445[-]	4690	_	0.0622775	0.0231041	0.0686369	Genic
100132356	lncRNA	LOC100132356	uncharacterized LOC100132356	NC_000005.10:43065187-43066971[-]	1785	_	0.119661	0.0719595	0.204248	Intergenic
100132707	lncRNA	PAXIP1-AS2	PAXIP1 antisense RNA 2	NC_000007.14:154928517-154949490[+]	20974	_	0.0568613	0.0108072	0.0106217	Genic
100132967	lncRNA	FAM223A	family with sequence similarity 223 member A (non-protein coding)	NC_000023.11:154571248-154571960[+]	713	_	0.175777	0.082857	0.148902	Genic
100133091	lncRNA	LOC100133091	uncharacterized LOC100133091	NC_000007.14:76549341-76627982[+]	78642	_	0.0579238	0.0173084	0.0197354	Genic
100133331	lncRNA	LOC100133331	uncharacterized LOC100133331	NC_000001.11:725759-730351[-]	4593	_	0.0872621	0.0455446	0.0860764	Genic
100134868	lncRNA	LOC100134868	uncharacterized LOC100134868	NC_000020.11:26009799-26023272[+]	13474	_	0.0266516	0.0179878	0.0389767	Intergenic
100174949	lncRNA	TRIM59-IFT80	TRIM59-IFT80 protein	NC_000003.12:160227454-160485747[-]	258294	_	0.372703	0.23693	0.33737	Genic
100287765	lncRNA	LINC00630	long intergenic non-protein coding RNA 630	NC_000023.11:102769153-102964523[+]	195371	_	0.0108077	0.00269783	0.00378717	Intergenic
100190939	lncRNA	TPT1-AS1	TPT1 antisense RNA 1	NC_000013.11:45341345-45391483[+]	50139	_	0.108469	0.0686582	0.0556565	Genic
100190986	lncRNA	LOC100190986	uncharacterized LOC100190986	NC_000016.10:21432003-21434455[-]	2453	_	0.535466	0.407954	0.560628	Intergenic
100506757	lncRNA	LINC00629	long intergenic non-protein coding RNA 629	NC_000023.11:134550024-134560398[+]	10375	_	0.0359311	0.11407	0.122846	Intergenic
100233209	lncRNA	PCED1B-AS1	PCED1B antisense RNA 1	NC_000012.12:47208420-47216443[-]	8024	_	0.497388	0.422923	0.498854	Genic
100240735	lncRNA	LOC100240735	uncharacterized LOC100240735	NC_000012.12:54078839-54081823[-]	2985	_	0.100702	0.0385651	0.0560612	Intergenic
100270804	lncRNA	LOC100270804	uncharacterized LOC100270804	NC_000020.11:18794049-18796065[+]	2017	_	0.103352	0.0690335	0.112598	Genic
127841	lncRNA	LINC00628	long intergenic non-protein coding RNA 628	NC_000001.11:204368430-204369719[-]	1290	_	0	0.000855933	0.00067392	Intergenic
100272217	lncRNA	LOC100272217	uncharacterized LOC100272217	NC_000009.12:130577350-130579494[-]	2145	_	0.0190251	0.0120809	0.0409458	Intergenic
728855	lncRNA	LINC00623	long intergenic non-protein coding RNA 623	NC_000001.11:120912238-120955811[+]	43574	_	0.59306	0.363618	0.443229	Intergenic
100287227	lncRNA	TIPARP-AS1	TIPARP antisense RNA 1	NC_000003.12:156673171-156675713[-]	2543	_	0.0198339	0.0114877	0.0149064	Genic
100287559	lncRNA	ADPGK-AS1	ADPGK antisense RNA 1	NC_000015.10:72782835-72798199[+]	15365	_	0.00616425	0.0121627	0.0109659	Genic
100287616	lncRNA	LOXL1-AS1	LOXL1 antisense RNA 1	NC_000015.10:73917468-73928248[-]	10781	_	0.0548596	0.014171	0.0148037	Genic
100288730	lncRNA	PAN3-AS1	PAN3 antisense RNA 1	NC_000013.11:28136843-28139174[-]	2332	_	0.27471	0.109065	0.223968	Genic
100288798	lncRNA	LOC100288798	uncharacterized LOC100288798	NC_000012.12:46383676-46652579[+]	268904	_	1.88765	1.11849	1.22603	Intergenic
100289019	lncRNA	SLC25A25-AS1	SLC25A25 antisense RNA 1	NC_000009.12:128111171-128118734[-]	7564	_	0.0764241	0.0477436	0.0539815	Genic
100289098	lncRNA	GS1-124K5.4	uncharacterized LOC100289098	NC_000007.14:66493632-66495474[+]	1843	_	0.086065	0.0507152	0.0473124	Intergenic
100289230	lncRNA	LOC100289230	uncharacterized LOC100289230	NC_000005.10:98929134-98931009[+]	1876	_	0.231966	0.221056	0.144211	Genic
100289274	lncRNA	DNAJC3-AS1	DNAJC3 antisense RNA 1 (head to head)	NC_000013.11:95672835-95676925[-]	4091	_	0.162803	0.055155	0.131208	Genic
100289341	lncRNA	MAN1B1-AS1	MAN1B1 antisense RNA 1 (head to head)	NC_000009.12:137084946-137086817[-]	1872	_	0.0835023	0.104425	0.174414	Genic
100289361	lncRNA	LOC100289361	uncharacterized LOC100289361	NC_000003.12:143000845-143001467[-]	623	_	0.0480579	0.0482158	0.0682092	Genic
100289373	lncRNA	UBAC2-AS1	UBAC2 antisense RNA 1	NC_000013.11:99196374-99200757[-]	4384	_	0.0596725	0.0253067	0.0374873	Genic
100289495	lncRNA	LOC100289495	uncharacterized LOC100289495	NC_000006.12:166342631-166351469[+]	8839	_	0.0298713	0.00621582	0.0185906	Intergenic
100291105	lncRNA	LOC100291105	uncharacterized LOC100291105	NC_000020.11:57384160-57393056[-]	8897	_	0.0998119	0.0442065	0.0836542	Genic
100294145	lncRNA	LOC100294145	uncharacterized LOC100294145	NC_000006.12:32894176-32903758[+]	9583	_	0.203178	0.134263	0.200134	Intergenic
100302650	lncRNA	BRE-AS1	BRE antisense RNA 1	NC_000002.12:27889456-27891114[-]	1659	_	0.017912	0.0266013	0.0242023	Genic
100302692	lncRNA	FTX	FTX transcript, XIST regulator (non-protein coding)	NC_000023.11:74028136-74293574[-]	265439	_	0.465596	0.272692	0.377131	Genic
100303453	lncRNA	TSNAX-DISC1	TSNAX-DISC1 readthrough (NMD candidate)	NC_000001.11:231528653-232041272[+]	512620	_	0.23764	0.165004	0.253369	Genic
100310756	lncRNA	LOC100310756	uncharacterized LOC100310756	NC_000008.11:143556819-143558271[-]	1453	_	0.0476269	0.0602892	0.127184	Genic
100379224	lncRNA	LOC100379224	uncharacterized LOC100379224	NC_000019.10:44105339-44113183[-]	7845	_	0.0264035	0.0278125	0.0238266	Genic
100499177	lncRNA	THAP9-AS1	THAP9 antisense RNA 1	NC_000004.12:82893452-82900916[-]	7465	_	0.839407	0.764008	0.94623	Genic
644242	lncRNA	LINC00622	long intergenic non-protein coding RNA 622	NC_000001.11:119597702-119599291[-]	1590	_	0.0151861	0.00964787	0.0114801	Intergenic
100499489	lncRNA	LOC100499489	uncharacterized LOC100499489	NC_000010.11:22435425-22437929[-]	2505	_	0.0442706	0.0499825	0.0683022	Intergenic
100505483	lncRNA	PRKAG2-AS1	PRKAG2 antisense RNA 1	NC_000007.14:151877042-151879223[+]	2182	_	0.0780013	0.120577	0.135186	Genic
100505501	lncRNA	LOC100505501	uncharacterized LOC100505501	NC_000008.11:59119210-59123478[+]	4269	_	0.138084	0.116225	0.269599	Genic
646324	lncRNA	LINC00607	long intergenic non-protein coding RNA 607	NC_000002.12:215611563-215843536[-]	231974	_	0	0	0.00433275	Intergenic
100505616	lncRNA	SNHG21	small nucleolar RNA host gene 21	NC_000015.10:82750564-82757206[+]	6643	_	0.315325	0.256623	0.352064	Genic
646982	lncRNA	LINC00598	long intergenic non-protein coding RNA 598	NC_000013.11:40347132-40481006[-]	133875	_	0.266112	0.0958172	0.164815	Intergenic
100505641	lncRNA	FGD5-AS1	FGD5 antisense RNA 1	NC_000003.12:14942779-14948441[-]	5663	_	8.22948	7.41309	12.5038	Genic
100505676	lncRNA	RRS1-AS1	RRS1 antisense RNA 1 (head to head)	NC_000008.11:66419587-66428977[-]	9391	_	0.0226878	0.00301193	0.00431923	Genic
100505696	lncRNA	SH3BP5-AS1	SH3BP5 antisense RNA 1	NC_000003.12:15254184-15264498[+]	10315	_	0.124461	0.0430341	0.0902811	Genic
81698	lncRNA	LINC00597	long intergenic non-protein coding RNA 597	NC_000015.10:77223893-77225404[-]	1512	_	0.0468233	0.0233587	0.0305197	Intergenic
100505746	lncRNA	ITGB2-AS1	ITGB2 antisense RNA 1	NC_000021.9:44921035-44929680[+]	8646	_	0.784969	0.431548	0.649826	Genic
100505761	lncRNA	RPARP-AS1	RPARP antisense RNA 1	NC_000010.11:102449817-102456293[+]	6477	_	0.202342	0.0532956	0.0773847	Genic
100505771	lncRNA	MHENCR	melanoma highly expressed competing endogenous lncRNA for miR-425 and miR-489	NC_000020.11:63627235-63628824[+]	1590	_	1.0713	0.365449	0.709374	Genic
100505812	lncRNA	CARD8-AS1	CARD8 antisense RNA 1	NC_000019.10:48255675-48258194[+]	2520	_	0.577157	0.54034	0.749783	Genic
100505854	lncRNA	APTR	Alu-mediated CDKN1A/p21 transcriptional regulator (non-protein coding)	NC_000007.14:77657660-77697345[-]	39686	_	0.0827214	0.0520122	0.0587871	Genic
100505869	lncRNA	CFAP58-AS1	CFAP58 antisense RNA 1 (head to head)	NC_000010.11:104351301-104353575[-]	2275	_	0.167283	0.107604	0.217788	Genic
102724845	lncRNA	LINC00596	#N/A	NC_000014.9:23838723-23933941[-]	95219	_	0	0.00027705	0	Intergenic
100505881	lncRNA	MAGI2-AS3	MAGI2 antisense RNA 3	NC_000007.14:79452957-79471208[+]	18252	_	0.695207	1.09029	1.58711	Genic
100505894	lncRNA	TMEM161B-AS1	TMEM161B antisense RNA 1	NC_000005.10:88268882-88436674[+]	167793	_	0.258993	0.0634487	0.0747131	Genic
100505933	lncRNA	ADD3-AS1	ADD3 antisense RNA 1	NC_000010.11:109945559-110008381[-]	62823	_	0.0469561	0.016557	0.0424064	Genic
100505994	lncRNA	LUCAT1	lung cancer associated transcript 1 (non-protein coding)	NC_000005.10:91302986-91314402[-]	11417	_	0.512546	0.125709	0.695731	Genic
100506007	lncRNA	RTCA-AS1	RTCA antisense RNA 1	NC_000001.11:100264742-100266174[-]	1433	_	1.11948	0.572694	0.905238	Genic
100506022	lncRNA	LOC100506022	uncharacterized LOC100506022	NC_000001.11:9425094-9428996[-]	3903	_	0.0492533	0.0110265	0.0292872	Intergenic
100506023	lncRNA	LOC100506023	uncharacterized LOC100506023	NC_000001.11:173235060-173477155[-]	242096	_	0.0384217	0.0207568	0.0332475	Genic
100506076	lncRNA	LOC100506076	uncharacterized LOC100506076	NC_000002.12:97278717-97291878[+]	13162	_	0.239948	0.123591	0.181871	Intergenic
100506098	lncRNA	LOC100506098	uncharacterized LOC100506098	NC_000007.14:20217577-20221700[+]	4124	_	0.0759491	0.174917	0.216589	Intergenic
100506100	lncRNA	LOC100506100	uncharacterized LOC100506100	NC_000009.12:128724462-128733243[+]	8782	_	0.272477	0.247511	0.560655	Genic
414926	lncRNA	LINC00593	long intergenic non-protein coding RNA 593	NC_000015.10:69835234-69842967[+]	7734	_	0	0	0.00041917	Intergenic
100506123	lncRNA	LOC100506123	uncharacterized LOC100506123	NC_000002.12:97416165-97424027[-]	7863	_	0.283647	0.169214	0.189619	Genic
100506124	lncRNA	LOC100506124	uncharacterized LOC100506124	NC_000002.12:165857475-165871941[-]	14467	_	0.123009	0.0070833	0.0239568	Intergenic
100874188	lncRNA	LINC00571	long intergenic non-protein coding RNA 571	NC_000013.11:38050817-38143232[-]	92416	_	0	0.00402135	0.00131253	Intergenic
100506215	lncRNA	PAXBP1-AS1	PAXBP1 antisense RNA 1	NC_000021.9:32728114-32743122[+]	15009	_	0.0463089	0.0231473	0.0188074	Genic
100506233	lncRNA	RAB30-AS1	RAB30 antisense RNA 1 (head to head)	NC_000011.10:83072066-83073712[+]	1647	_	0.535659	0.145355	0.235046	Genic
100506258	lncRNA	LOC100506258	uncharacterized LOC100506258	NC_000011.10:7437627-7465835[-]	28209	_	0.0362365	0.0214625	0.016979	Genic
100506282	lncRNA	LOC100506282	uncharacterized LOC100506282	NC_000011.10:83184491-83193669[-]	9179	_	0.0855648	0.0746679	0.0991596	Genic
100506299	lncRNA	ID2-AS1	ID2 antisense RNA 1 (head to head)	NC_000002.12:8670984-8681863[-]	10880	_	0.302686	0.272737	0.381396	Genic
100506302	lncRNA	LOC100506302	uncharacterized LOC100506302	NC_000007.14:155641916-155644406[-]	2491	_	0.158905	0.100618	0.0980171	Intergenic
100506311	lncRNA	HOTAIRM1	HOXA transcript antisense RNA, myeloid-specific 1	NC_000007.14:27096094-27100258[+]	4165	_	0.389293	0.374984	1.00287	Genic
100506314	lncRNA	GPRC5D-AS1	GPRC5D and HEBP1 antisense RNA 1	NC_000012.12:12927726-13022498[+]	94773	_	0.118117	0.0658404	0.0754852	Genic
283486	lncRNA	LINC00567	long intergenic non-protein coding RNA 567	NC_000013.11:110809676-110813084[-]	3409	_	0	0.000120817	0.000123102	Intergenic
100506343	lncRNA	FAM212B-AS1	FAM212B antisense RNA 1	NC_000001.11:111739841-111747798[+]	7958	_	1.68514	1.1372	1.5795	Genic
100861555	lncRNA	LINC00565	long intergenic non-protein coding RNA 565	NC_000013.11:113926514-113928991[-]	2478	_	0.0042745	0.0136577	0.0189782	Intergenic
100506436	lncRNA	SPAG5-AS1	SPAG5 antisense RNA 1	NC_000017.11:28599133-28617377[+]	18245	_	0.18395	0.15846	0.151232	Genic
100506443	lncRNA	ITPKB-IT1	ITPKB intronic transcript 1	NC_000001.11:226656080-226675068[-]	18989	_	0.0601159	0.0201809	0.0338061	Genic
100506469	lncRNA	TMEM147-AS1	TMEM147 antisense RNA 1	NC_000019.10:35540738-35546029[-]	5292	_	0.0993336	0.0408686	0.0362401	Genic
100506544	lncRNA	LOC100506544	uncharacterized LOC100506544	NC_000022.11:41209122-41217627[-]	8506	_	0.441416	0.321633	0.46191	Genic
100506548	lncRNA	LOC100506548	uncharacterized LOC100506548	NC_000005.10:40825262-40829142[-]	3881	_	0.237695	0.208892	0.664148	Intergenic
100506585	lncRNA	LOC100506585	uncharacterized LOC100506585	NC_000007.14:157854585-157866092[+]	11508	_	0.0263944	0.0128915	0.0256381	Genic
100506603	lncRNA	VASH1-AS1	VASH1 antisense RNA 1	NC_000014.9:76781733-76786724[-]	4992	_	0.0490928	0.071637	0.0938265	Genic
100506639	lncRNA	LOC100506639	uncharacterized LOC100506639	NC_000005.10:43067023-43093558[+]	26536	_	0.0704581	0.0514549	0.076475	Intergenic
100506681	lncRNA	JARID2-AS1	JARID2 antisense RNA 1	NC_000006.12:15247815-15248696[-]	882	_	0.32371	0.143438	0.210385	Genic
100506686	lncRNA	IQCH-AS1	IQCH antisense RNA 1	NC_000015.10:67403611-67521844[-]	118234	_	0.0373556	0.0140473	0.0171371	Genic
100506713	lncRNA	ALOX12-AS1	ALOX12 antisense RNA 1	NC_000017.11:6985123-7012334[-]	27212	_	0.0786563	0.0291027	0.0226936	Genic
100506714	lncRNA	NUP50-AS1	NUP50 antisense RNA 1 (head to head)	NC_000022.11:45133758-45163781[-]	30024	_	0.185847	0.0593758	0.0734247	Genic
100506730	lncRNA	LOC100506730	uncharacterized LOC100506730	NC_000001.11:19293247-19295736[-]	2490	_	0.0394124	0.0249484	0.0287279	Intergenic
100861546	lncRNA	LINC00564	long intergenic non-protein coding RNA 564	NC_000013.11:81225865-81226983[-]	1119	_	0	0.000736083	0	Intergenic
100506776	lncRNA	TRG-AS1	T cell receptor gamma locus antisense RNA 1	NC_000007.14:38341577-38378637[+]	37061	_	0.929461	0.537236	0.765968	Genic
100506779	lncRNA	TSPOAP1-AS1	TSPOAP1 antisense RNA 1	NC_000017.11:58325450-58353727[+]	28278	_	3.28302	2.20025	3.18634	Genic
100506915	lncRNA	CHRM3-AS2	CHRM3 antisense RNA 2	NC_000001.11:239707126-239719119[-]	11994	_	0.119015	0.0514504	0.110962	Genic
100506922	lncRNA	LOC100506922	#N/A	NC_000002.12:127387077-127406167[+]	19091	_	0.0674121	0.0550714	0.0399513	Genic
100506963	lncRNA	ELOA-AS1	ELOA antisense RNA 1	NC_000001.11:23760382-23778297[-]	17916	_	0.145536	0.0567255	0.105009	Genic
100506990	lncRNA	LOC100506990	uncharacterized LOC100506990	NC_000008.11:12437013-12566845[+]	129833	_	0.0549949	0.0344255	0.0609759	Intergenic
100507006	lncRNA	LOC100507006	uncharacterized LOC100507006	NC_000002.12:64228401-64252531[+]	24131	_	0.0192516	0.204575	0.202975	Intergenic
100507053	lncRNA	LOC100507053	uncharacterized LOC100507053	NC_000004.12:99088857-99301356[+]	212500	_	0.0188696	0.0173177	0.00737449	Genic
100507062	lncRNA	PSMD6-AS2	PSMD6 antisense RNA 2	NC_000003.12:64004022-64012243[+]	8222	_	0.257184	0.137727	0.257676	Genic
100507103	lncRNA	LOC100507103	#N/A	NC_000009.12:90973797-91165753[-]	191957	_	0.0188972	0.0118409	0.0153721	Genic
100507117	lncRNA	ASAP1-IT2	ASAP1 intronic transcript 2	NC_000008.11:130082738-130084768[-]	2031	_	0.110568	0.0928672	0.19217	Genic
100861554	lncRNA	LINC00563	long intergenic non-protein coding RNA 563	NC_000013.11:46296445-46297844[-]	1400	_	0	0.00510137	0.000702739	Intergenic
100507178	lncRNA	SLFNL1-AS1	SLFNL1 antisense RNA 1	NC_000001.11:41014590-41043890[+]	29301	_	0.008166	0.015974	0.0192092	Genic
100861549	lncRNA	LINC00562	long intergenic non-protein coding RNA 562	NC_000013.11:47930153-47932622[-]	2470	_	0.0507952	0.0341645	0.0501998	Intergenic
100861545	lncRNA	LINC00561	long intergenic non-protein coding RNA 561	NC_000013.11:75932398-75935132[-]	2735	_	0	0.0001656	0	Intergenic
100507246	lncRNA	SNHG16	small nucleolar RNA host gene 16	NC_000017.11:76557764-76565348[+]	7585	_	1.64442	1.84494	2.4331	Genic
100507266	lncRNA	STX18-AS1	STX18 antisense RNA 1 (head to head)	NC_000004.12:4542131-4710938[+]	168808	_	0.0268601	0.0134654	0.0113385	Genic
100507297	lncRNA	TMEM44-AS1	TMEM44 antisense RNA 1	NC_000003.12:194584268-194590832[+]	6565	_	0.0616465	0.0199206	0.0327306	Genic
100507316	lncRNA	MINCR	MYC-induced long non-coding RNA	NC_000008.11:143280155-143281700[-]	1546	_	0.295275	0.0762186	0.110542	Genic
100507321	lncRNA	ERVK13-1	endogenous retrovirus group K13 member 1	NC_000016.10:2658389-2673439[-]	15051	_	0.186593	0.0708321	0.100229	Genic
100507351	lncRNA	LOC100507351	uncharacterized LOC100507351	NC_000017.11:77546941-77565024[+]	18084	_	0.0287742	0.00646873	0.0166505	Intergenic
100507373	lncRNA	LOC100507373	uncharacterized LOC100507373	NC_000019.10:14137152-14171264[+]	34113	_	0.11329	0.0979356	0.12615	Genic
100507401	lncRNA	LRP4-AS1	LRP4 antisense RNA 1	NC_000011.10:46846411-46874416[+]	28006	_	0.0076685	0.0364048	0.0936151	Genic
100507419	lncRNA	MMP25-AS1	MMP25 antisense RNA 1	NC_000016.10:3052125-3059370[-]	7246	_	0.13362	0.0432483	0.0549656	Genic
100507495	lncRNA	SDCBP2-AS1	SDCBP2 antisense RNA 1	NC_000020.11:1325343-1378735[+]	53393	_	0.0608465	0.0424993	0.0375048	Genic
100507524	lncRNA	ARHGEF26-AS1	ARHGEF26 antisense RNA 1	NC_000003.12:154024401-154121210[-]	96810	_	0.0639814	0.0244101	0.0331901	Genic
100130386	lncRNA	LINC00552	long intergenic non-protein coding RNA 552	NC_000013.11:113748511-113751089[-]	2579	_	0	0.000463783	0	Intergenic
100507547	lncRNA	LOC100507547	uncharacterized LOC100507547	NC_000006.12:32152802-32154365[-]	1564	_	0.0281454	0.0383901	0.0451203	Genic
100507567	lncRNA	RAB11B-AS1	RAB11B antisense RNA 1	NC_000019.10:8374376-8390691[-]	16316	_	0.0430285	0.034315	0.031965	Genic
100506622	lncRNA	LINC00540	long intergenic non-protein coding RNA 540	NC_000013.11:22210285-22276521[+]	66237	_	0.0132595	0.00167132	0.00179932	Intergenic
100652865	lncRNA	LINC00539	long intergenic non-protein coding RNA 539	NC_000013.11:21303512-21344859[-]	41348	_	0	0.0116589	0.00343482	Intergenic
100507634	lncRNA	LOC100507634	uncharacterized LOC100507634	NC_000001.11:55215408-55217455[+]	2048	_	0.0517306	0.0377087	0.0447347	Intergenic
203274	lncRNA	LINC00537	long intergenic non-protein coding RNA 537	NC_000009.12:63812941-63819029[+]	6089	_	0.0325774	0.00723515	0.0113284	Intergenic
100507642	lncRNA	LOC100507642	uncharacterized LOC100507642	NC_000007.14:149718-155465[+]	5748	_	0.0749742	0.0293185	0.0387094	Intergenic
100526830	lncRNA	SLX1A-SULT1A3	SLX1A-SULT1A3 readthrough (NMD candidate)	NC_000016.10:30194433-30204329[+]	9897	_	0.221612	0.161066	0.281802	Genic
100526831	lncRNA	SLX1B-SULT1A4	SLX1B-SULT1A4 readthrough (NMD candidate)	NC_000016.10:29455091-29464980[+]	9890	_	0.175932	0.138117	0.264299	Genic
100526836	lncRNA	BLOC1S5-TXNDC5	BLOC1S5-TXNDC5 readthrough (NMD candidate)	NC_000006.12:7881250-8064414[-]	183165	_	0.933796	0.998167	1.43244	Genic
100526837	lncRNA	EEF1E1-BLOC1S5	EEF1E1-BLOC1S5 readthrough (NMD candidate)	NC_000006.12:8013567-8102595[-]	89029	_	0.686354	0.768283	0.794873	Genic
100527960	lncRNA	MROH7-TTC4	MROH7-TTC4 readthrough (NMD candidate)	NC_000001.11:54641740-54742657[+]	100918	_	0.0694188	0.052195	0.0994492	Genic
100528016	lncRNA	TMX2-CTNND1	TMX2-CTNND1 readthrough (NMD candidate)	NC_000011.10:57712523-57819180[+]	106658	_	0.180147	0.0364333	0.0428746	Genic
100528018	lncRNA	ARL2-SNX15	ARL2-SNX15 readthrough (NMD candidate)	NC_000011.10:65014113-65040572[+]	26460	_	0.163307	0.110745	0.186671	Genic
100528031	lncRNA	FKBP1A-SDCBP2	FKBP1A-SDCBP2 readthrough (NMD candidate)	NC_000020.11:1309909-1393172[-]	83264	_	0.0741385	0.0326915	0.0534409	Genic
100529067	lncRNA	SERF2-C15ORF63	SERF2-C15orf63 readthrough	NC_000015.10:43791976-43802589[+]	10614	_	0.260853	0.0940888	0.0925372	Genic
100529145	lncRNA	TEN1-CDK3	TEN1-CDK3 readthrough (NMD candidate)	NC_000017.11:75979217-76005999[+]	26783	_	0.118432	0.0900572	0.0961832	Genic
100529209	lncRNA	RNASEK-C17orf49	RNASEK-C17orf49 readthrough	NC_000017.11:7012417-7017524[+]	5108	_	0.60223	0.111262	0.342146	Genic
100529262	lncRNA	MIA-RAB4B	MIA-RAB4B readthrough (NMD candidate)	NC_000019.10:40775537-40796944[+]	21408	_	0.114864	0.0643457	0.11332	Genic
100529264	lncRNA	RAB4B-EGLN2	RAB4B-EGLN2 readthrough (NMD candidate)	NC_000019.10:40778219-40808441[+]	30223	_	0.589707	0.283665	0.651958	Genic
100529855	lncRNA	ZNF625-ZNF20	ZNF625-ZNF20 readthrough (NMD candidate)	NC_000019.10:12131350-12156731[-]	25382	_	0.03208	0.0160705	0.0322615	Genic
100532724	lncRNA	NPHP3-ACAD11	NPHP3-ACAD11 readthrough (NMD candidate)	NC_000003.12:132558138-132722459[-]	164322	_	0.455458	0.276573	0.46361	Genic
100532732	lncRNA	MSH5-SAPCD1	MSH5-SAPCD1 readthrough (NMD candidate)	NC_000006.12:31739948-31764850[+]	24903	_	0.0459828	0.0232619	0.0284552	Genic
100532735	lncRNA	INO80B-WBP1	INO80B-WBP1 readthrough (NMD candidate)	NC_000002.12:74455023-74460891[+]	5869	_	0.305537	0.116253	0.255846	Genic
100532737	lncRNA	ATP6V1G2-DDX39B	ATP6V1G2-DDX39B readthrough (NMD candidate)	NC_000006.12:31530219-31546848[-]	16630	_	1.04566	0.804703	0.742124	Genic
100532746	lncRNA	PPT2-EGFL8	PPT2-EGFL8 readthrough (NMD candidate)	NC_000006.12:32153999-32168285[+]	14287	_	0.0990549	0.0329925	0.0448999	Genic
100533107	lncRNA	RTEL1-TNFRSF6B	RTEL1-TNFRSF6B readthrough (NMD candidate)	NC_000020.11:63657810-63698698[+]	40889	_	0.0342501	0.0101008	0.012116	Genic
100533464	lncRNA	PRH1-PRR4	PRH1-PRR4 readthrough	NC_000012.12:10845849-11171625[-]	325777	_	0.0694899	0.0173127	0.0166826	Genic
100534593	lncRNA	STX16-NPEPL1	STX16-NPEPL1 readthrough (NMD candidate)	NC_000020.11:58651253-58715844[+]	64592	_	0.125642	0.105177	0.180276	Genic
100534595	lncRNA	HNRNPUL2-BSCL2	HNRNPUL2-BSCL2 readthrough (NMD candidate)	NC_000011.10:62690262-62727384[-]	37123	_	0.875533	0.505035	0.985004	Genic
100630918	lncRNA	PARTICL	promoter of MAT2A antisense radiation-induced circulating long non-coding RNA	NC_000002.12:85537467-85538886[-]	1420	_	0.026726	0.0312388	0.0397865	Genic
100630923	lncRNA	LOC100630923	LOC100289561-PRKRIP1 readthrough	NC_000007.14:102363861-102426682[+]	62822	_	0.0990423	0.0702892	0.0893988	Genic
100652768	lncRNA	LOC100652768	uncharacterized LOC100652768	NC_000011.10:117195613-117201914[-]	6302	_	0.0839043	0.0514735	0.0541662	Genic
100750325	lncRNA	RCAN3AS	RCAN3 antisense RNA	NC_000001.11:24496254-24502382[-]	6129	_	0.77549	0.405143	0.853467	Genic
100859930	lncRNA	HEIH	hepatocellular carcinoma up-regulated EZH2-associated long non-coding RNA	NC_000005.10:180829954-180831618[-]	1665	_	0.524555	0.386635	0.541462	Genic
100861530	lncRNA	UFL1-AS1	#N/A	NC_000006.12:96364771-96521741[-]	156971	_	0.0261155	0.00875435	0.009904	Genic
100874052	lncRNA	LINC00534	long intergenic non-protein coding RNA 534	NC_000008.11:90221488-90387959[+]	166472	_	0.730518	1.1132	1.69692	Intergenic
200298	lncRNA	LINC00528	long intergenic non-protein coding RNA 528	NC_000022.11:17777290-17779481[+]	2192	_	0.183013	0.213782	0.318954	Intergenic
100862692	lncRNA	DIP2A-IT1	DIP2A intronic transcript 1	NC_000021.9:46462471-46469306[+]	6836	_	0.152786	0.116587	0.389859	Genic
100873955	lncRNA	LNX1-AS2	LNX1 antisense RNA 2	NC_000004.12:53592956-53605382[+]	12427	_	0.00956337	0.0116659	0.0223193	Genic
100873975	lncRNA	CNTN4-AS1	CNTN4 antisense RNA 1	NC_000003.12:3039661-3061145[-]	21485	_	0.341921	0.099622	0.123344	Genic
100873998	lncRNA	MEIS1-AS2	MEIS1 antisense RNA 2	NC_000002.12:66439087-66440330[-]	1244	_	0.505229	0.223	0.289055	Genic
100874058	lncRNA	COX10-AS1	COX10 antisense RNA 1	NC_000017.11:14029292-14069458[-]	40167	_	0.139123	0.0526111	0.0575264	Genic
100874069	lncRNA	STK24-AS1	STK24 antisense RNA 1	NC_000013.11:98577255-98578841[+]	1587	_	0.0454948	0.0228521	0.0266181	Genic
100874071	lncRNA	USP12-AS2	USP12 antisense RNA 2 (head to head)	NC_000013.11:27172259-27183503[+]	11245	_	0.0781449	0.0483323	0.11037	Genic
100874123	lncRNA	ZNRF3-AS1	ZNRF3 antisense RNA 1	NC_000022.11:29024999-29031476[-]	6478	_	0.008311	0.00973173	0.0163247	Genic
100874207	lncRNA	ST3GAL6-AS1	ST3GAL6 antisense RNA 1	NC_000003.12:98714333-98732651[-]	18319	_	0.158122	0.0374367	0.0231367	Genic
100874284	lncRNA	DNM3-IT1	DNM3 intronic transcript 1	NC_000001.11:171864192-171864687[+]	496	_	0.0211611	0.0528655	0.0723527	Genic
100874291	lncRNA	ALMS1-IT1	ALMS1 intronic transcript 1	NC_000002.12:73457103-73459482[+]	2380	_	0.037645	0.0446937	0.0766602	Genic
100874322	lncRNA	BACH1-IT2	BACH1 intronic transcript 2	NC_000021.9:29372501-29373980[+]	1480	_	0.155763	0.0486603	0.112752	Genic
100874337	lncRNA	PLCB1-IT1	PLCB1 intronic transcript 1	NC_000020.11:8248704-8249742[+]	1039	_	0.243846	0.0504217	0.0450396	Genic
100885789	lncRNA	IFNG-AS1	IFNG antisense RNA 1	NC_000012.12:67989445-68021327[+]	31883	_	0.0815586	0.0238804	0.018295	Genic
147525	lncRNA	LINC00526	long intergenic non-protein coding RNA 526	NC_000018.10:5236724-5238029[-]	1306	_	0.0447394	0.084673	0.0386047	Intergenic
100996348	lncRNA	CA3-AS1	CA3 antisense RNA 1	NC_000008.11:85441806-85464915[-]	23110	_	0.68742	0.336032	0.659686	Genic
100996539	lncRNA	ITPR1-AS1	ITPR1 antisense RNA 1 (head to head)	NC_000003.12:4490317-4493163[-]	2847	_	0.0998435	0.122662	0.103444	Genic
100996549	lncRNA	LOC100996549	#N/A	NC_000002.12:9758590-9778564[-]	19975	_	0.0916477	0.0324328	0.0283589	Intergenic
100996740	lncRNA	LOC100996740	uncharacterized LOC100996740	NC_000001.11:145214851-145216577[+]	1727	_	0.0458873	0.0540697	0.0659916	Intergenic
101059954	lncRNA	LOC101059954	#N/A	NC_000017.11:40523196-40527002[+]	3807	_	0.117913	0.0231549	0.0248164	Intergenic
84847	lncRNA	LINC00525	long intergenic non-protein coding RNA 525	NC_000007.14:47761476-47766772[+]	5297	_	0	0.00125547	0	Intergenic
101060091	lncRNA	LOC101060091	uncharacterized LOC101060091	NC_000002.12:113831183-113890992[-]	59810	_	0.403515	0.0713212	0.0564876	Genic
101060691	lncRNA	NUTM2B-AS1	NUTM2B antisense RNA 1	NC_000010.11:79691500-79826594[-]	135095	_	0.585776	0.476382	0.674604	Genic
101410533	lncRNA	YTHDF3-AS1	YTHDF3 antisense RNA 1 (head to head)	NC_000008.11:63167725-63168442[-]	718	_	0.0344965	0.0299872	0.0781384	Genic
101410543	lncRNA	XXYLT1-AS2	XXYLT1 antisense RNA 2	NC_000003.12:195147871-195152856[+]	4986	_	0.257307	0.147369	0.0842424	Genic
101752399	lncRNA	STAG3L5P-PVRIG2P-PILRB	STAG3L5P-PVRIG2P-PILRB readthrough	NC_000007.14:100336065-100367831[+]	31767	_	0.40942	0.217664	0.220806	Genic
101752400	lncRNA	CAPN10-AS1	CAPN10 antisense RNA 1 (head to head)	NC_000002.12:240582750-240586316[-]	3567	_	0.0217115	0.0157448	0.0236153	Genic
101867536	lncRNA	PRNCR1	prostate cancer associated non-coding RNA 1	NC_000008.11:127079874-127092595[+]	12722	_	0.0337108	0.0323367	0.0393726	Genic
101926893	lncRNA	LIX1-AS1	#N/A	NC_000005.10:97071468-97183123[+]	111656	_	0.127643	0.0817814	0.0496963	Genic
101926935	lncRNA	LOC101926935	uncharacterized LOC101926935	NC_000020.11:25844667-25854021[-]	9355	_	0.0097845	0.00457387	0.0143655	Intergenic
101926963	lncRNA	LOC101926963	uncharacterized LOC101926963	NC_000007.14:602845-608502[+]	5658	_	0.895044	0.708342	1.56788	Genic
101926967	lncRNA	LOC101926967	#N/A	NC_000017.11:44198737-44223703[+]	24967	_	0.217863	0.157227	0.33799	Genic
101927021	lncRNA	LOC101927021	uncharacterized LOC101927021	NC_000007.14:1160374-1165958[+]	5585	_	0.0441254	0.0180316	0.0266589	Intergenic
101927027	lncRNA	LOC101927027	uncharacterized LOC101927027	NC_000002.12:178413659-178440243[+]	26585	_	0.1481	0.143107	0.110609	Genic
101927060	lncRNA	LOC101927060	#N/A	NC_000017.11:46982786-47100283[-]	117498	_	0.147573	0.0631762	0.132755	Genic
101927069	lncRNA	LOC101927069	uncharacterized LOC101927069	NC_000009.12:68953088-68975841[-]	22754	_	0.0575651	0.0447058	0.0574584	Genic
101927086	lncRNA	LOC101927086	#N/A	NC_000009.12:70413672-70602089[+]	188418	_	0.0177571	0.0116985	0.00903794	Genic
101927150	lncRNA	L3MBTL4-AS1	L3MBTL4 antisense RNA 1	NC_000018.10:6256744-6260934[+]	4191	_	0.486903	0.280663	0.506194	Genic
101927151	lncRNA	LOC101927151	uncharacterized LOC101927151	NC_000019.10:27793431-28024969[+]	231539	_	0.0673994	0.00770732	0.0132225	Genic
101927204	lncRNA	FAM111A-DT	FAM111A divergent transcript	NC_000011.10:59133972-59142808[-]	8837	_	0.169519	0.0429312	0.053882	Genic
645687	lncRNA	LINC00520	long intergenic non-protein coding RNA 520	NC_000014.9:55781135-55796674[-]	15540	_	0.0829729	0.0415685	0.190613	Intergenic
101927221	lncRNA	UBR5-AS1	UBR5 antisense RNA 1	NC_000008.11:102239451-102252174[+]	12724	_	0.123943	0.0273139	0.0488462	Genic
101927272	lncRNA	LOC101927272	uncharacterized LOC101927272	NC_000016.10:50668855-50671639[+]	2785	_	0.0753934	0.0339666	0.17118	Genic
101927288	lncRNA	MANEA-AS1	MANEA antisense RNA 1 (head to head)	NC_000006.12:95560096-95577451[-]	17356	_	0.184725	0.161936	0.210198	Genic
101927300	lncRNA	LOC101927300	#N/A	NC_000010.11:99430704-99438117[+]	7414	_	0.0154654	0.00246942	0.00615744	Genic
101927366	lncRNA	LOC101927366	#N/A	NC_000002.12:192046376-192055539[+]	9164	_	0.0161811	0.00560705	0.0278291	Genic
101927367	lncRNA	LOC101927367	#N/A	NC_000017.11:55449863-55458538[-]	8676	_	0.163101	0.0346904	0.0340638	Intergenic
101927391	lncRNA	LOC101927391	uncharacterized LOC101927391	NC_000007.14:7550104-7566065[-]	15962	_	0.0226997	0.0115213	0.00963156	Intergenic
101927402	lncRNA	LOC101927402	uncharacterized LOC101927402	NC_000002.12:64522189-64524155[-]	1967	_	0.160525	0.0911336	0.140864	Intergenic
101927413	lncRNA	LOC101927413	#N/A	NC_000008.11:108893712-108949003[-]	55292	_	0.899878	0.27268	0.0819257	Intergenic
101927420	lncRNA	LOC101927420	uncharacterized LOC101927420	NC_000007.14:87151423-87152493[-]	1071	_	1.01074	0.439455	0.66604	Genic
101927441	lncRNA	LOC101927441	#N/A	NC_000001.11:15388358-15413823[-]	25466	_	0.0132776	0.00771985	0.00529218	Genic
101927482	lncRNA	LOC101927482	uncharacterized LOC101927482	NC_000002.12:196260024-196264204[+]	4181	_	0.672025	0.554546	1.55523	Genic
101927538	lncRNA	LOC101927538	#N/A	NC_000006.12:109334192-109352879[-]	18688	_	0.0276064	0.00966798	0.0115812	Genic
101927547	lncRNA	ANKRD44-IT1	ANKRD44 intronic transcript 1	NC_000002.12:197250858-197302519[-]	51662	_	1.36314	0.748507	1.40724	Genic
101927559	lncRNA	CEBPB-AS1	CEBPB antisense RNA 1	NC_000020.11:50184603-50192069[-]	7467	_	0	0.0113756	0.0143149	Genic
101927597	lncRNA	NCK1-AS1	NCK1 antisense RNA 1 (head to head)	NC_000003.12:136841976-136862063[-]	20088	_	0.658827	0.584782	1.04458	Genic
101927599	lncRNA	ZNF529-AS1	ZNF529 antisense RNA 1	NC_000019.10:36573070-36594716[+]	21647	_	0.590065	0.425892	0.676425	Genic
101927603	lncRNA	LOC101927603	#N/A	NC_000009.12:85534067-85540871[-]	6805	_	0.0112909	0.00453565	0.00570695	Intergenic
101927612	lncRNA	RNF139-AS1	RNF139 antisense RNA 1 (head to head)	NC_000008.11:124462493-124474563[-]	12071	_	0.035985	0.0471715	0.059853	Genic
282566	lncRNA	LINC00515	long intergenic non-protein coding RNA 515	NC_000021.9:25582775-25583224[-]	450	_	0.0304161	0.00656698	0.0122089	Intergenic
101927690	lncRNA	LOC101927690	uncharacterized LOC101927690	NC_000014.9:56514331-56551309[+]	36979	_	0.022731	0.0101145	0.00969785	Intergenic
101927702	lncRNA	LOC101927702	#N/A	NC_000014.9:60240127-60245636[-]	5510	_	0.0497079	0.0120532	0.00344907	Intergenic
101927723	lncRNA	LOC101927723	#N/A	NC_000002.12:68361214-68370508[-]	9295	_	0.0697081	0.0355722	0.0692345	Genic
101927752	lncRNA	LOC101927752	uncharacterized LOC101927752	NC_000008.11:1761963-1764584[-]	2622	_	1.81924	1.76405	2.5849	Genic
101927765	lncRNA	LOC101927765	uncharacterized LOC101927765	NC_000001.11:234372807-234373593[-]	787	_	0.10743	0.0659198	0.0936713	Genic
101927777	lncRNA	SATB1-AS1	SATB1 antisense RNA 1	NC_000003.12:18445237-18530114[+]	84878	_	0.24907	0.152138	0.145617	Genic
101927811	lncRNA	LOC101927811	uncharacterized LOC101927811	NC_000007.14:20328301-20331762[-]	3462	_	0.0943331	0.0427337	0.0672819	Genic
101927837	lncRNA	LOC101927837	#N/A	NC_000016.10:67481319-67505977[+]	24659	_	0.0717471	0.0187613	0.0206121	Genic
101927858	lncRNA	LOC101927858	#N/A	NC_000007.14:156654742-156659587[-]	4846	_	0.0368489	0.0139024	0.0167806	Genic
101927868	lncRNA	GRK5-IT1	#N/A	NC_000010.11:119207983-119212704[+]	4722	_	0.114821	0.154568	0.257929	Genic
104472718	lncRNA	LINC00508	long intergenic non-protein coding RNA 508	NC_000012.12:127883989-127983891[-]	99903	_	0.0860615	0.0148069	0.0118968	Intergenic
100862680	lncRNA	LINC00507	long intergenic non-protein coding RNA 507	NC_000012.12:127915410-127951552[+]	36143	_	0.00204962	0	0	Intergenic
101927963	lncRNA	LOC101927963	#N/A	NC_000008.11:141125940-141130279[-]	4340	_	0.0966269	0.0549901	0.0896856	Genic
101927974	lncRNA	LOC101927974	uncharacterized LOC101927974	NC_000007.14:107742753-107744581[-]	1829	_	0.177961	0.22417	0.251985	Genic
101928004	lncRNA	LOC101928004	#N/A	NC_000006.12:6694799-6801212[-]	106414	_	0.0336402	0.00451397	0.00385848	Genic
101928020	lncRNA	LOC101928020	uncharacterized LOC101928020	NC_000002.12:210029922-210064356[+]	34435	_	0.183194	0.03315	0.0354735	Genic
100846978	lncRNA	LINC00506	long intergenic non-protein coding RNA 506	NC_000003.12:87089280-87157069[+]	67790	_	0	0.000503467	0.000184909	Intergenic
101928085	lncRNA	ERICH6-AS1	ERICH6 antisense RNA 1	NC_000003.12:150703564-150720146[+]	16583	_	0.183011	0.0673474	0.0900436	Genic
101928092	lncRNA	LOC101928092	#N/A	NC_000024.10:2566029-2609181[-]	43153	_	0.052611	0.0189937	0.0275239	Intergenic
101928096	lncRNA	LOC101928096	#N/A	NC_000006.12:126100801-126202131[+]	101331	_	0.0140074	0.0031862	0.00172256	Intergenic
101928126	lncRNA	LOC101928126	uncharacterized LOC101928126	NC_000021.9:33976382-33977691[+]	1310	_	0.171535	0.0398422	0.0909856	Intergenic
101928150	lncRNA	LOC101928150	uncharacterized LOC101928150	NC_000010.11:6618716-6639781[+]	21066	_	0.052852	0.0249706	0.0159655	Intergenic
101928152	lncRNA	LOC101928152	#N/A	NC_000002.12:87470150-87485191[-]	15042	_	0.0141404	0.00317545	0.00789409	Genic
101928230	lncRNA	LOC101928230	#N/A	NC_000016.10:79600901-79612513[+]	11613	_	0.0568744	0.00967323	0.0221165	Genic
101928235	lncRNA	CTB-41I6.1	#N/A	NC_000017.11:8965798-8968423[+]	2626	_	0.0853956	0.0607472	0.0834885	Intergenic
101928236	lncRNA	LOC101928236	#N/A	NC_000003.12:157167348-157395749[+]	228402	_	0.012257	0.00107755	0.0027228	Genic
101928238	lncRNA	ZNF426-DT	ZNF426 divergent transcript	NC_000019.10:9538666-9539730[+]	1065	_	0.219282	0.169804	0.173794	Genic
101928344	lncRNA	LOC101928344	#N/A	NC_000019.10:204025-246524[-]	42500	_	0.0421882	0.0176831	0.0439347	Intergenic
101928361	lncRNA	LOC101928361	#N/A	NC_000002.12:143598906-143608759[+]	9854	_	0.284391	0.171414	0.263172	Genic
101928369	lncRNA	LOC101928369	#N/A	NC_000021.9:43108007-43144677[+]	36671	_	0.161507	0.0992792	0.0790979	Genic
101928377	lncRNA	LOC101928377	#N/A	NC_000014.9:75423667-75427690[-]	4024	_	0.00506513	0.00857628	0.0118241	Genic
101928378	lncRNA	PTOV1-AS2	PTOV1 antisense RNA 2	NC_000019.10:49856465-49859289[-]	2825	_	0.152103	0.071157	0.0841698	Genic
101928383	lncRNA	LOC101928383	#N/A	NC_000004.12:173382097-173391231[+]	9135	_	0.0950848	0.0174628	0.0374032	Genic
101928387	lncRNA	LOC101928387	#N/A	NC_000012.12:19553044-19672993[+]	119950	_	0.0186816	0.00687945	0.00608201	Intergenic
101928402	lncRNA	LOC101928402	uncharacterized LOC101928402	NC_000023.11:123959233-123961341[-]	2109	_	0.118694	0.0956517	0.133362	Genic
101928403	lncRNA	LOC101928403	uncharacterized LOC101928403	NC_000002.12:88627829-88631825[+]	3997	_	0.0944668	0.0478666	0.025067	Intergenic
101928421	lncRNA	LOC101928421	#N/A	NC_000007.14:35609752-35631624[-]	21873	_	0.0614094	0.022147	0.0509408	Intergenic
101928433	lncRNA	LOC101928433	uncharacterized LOC101928433	NC_000006.12:16761138-16766883[+]	5746	_	0.0330853	0.0193702	0.0342698	Genic
101928451	lncRNA	LOC101928451	#N/A	NC_000007.14:128531332-128640002[+]	108671	_	0.720336	0.419248	0.775187	Genic
101928465	lncRNA	LOC101928465	#N/A	NC_000020.11:62648961-62653838[-]	4878	_	0.0431477	0.0195488	0.0218593	Genic
101928487	lncRNA	LOC101928487	#N/A	NC_000002.12:218216103-218217117[-]	1015	_	0.0926411	0.0577981	0.15308	Genic
101928489	lncRNA	LOC101928489	uncharacterized LOC101928489	NC_000006.12:73693903-73696131[-]	2229	_	0.489033	0.455979	0.788122	Genic
101928492	lncRNA	OR2A1-AS1	OR2A1 antisense RNA 1	NC_000007.14:144238573-144355718[-]	117146	_	0.080382	0.0448928	0.0474632	Genic
101928504	lncRNA	LOC101928504	uncharacterized LOC101928504	NC_000014.9:81221218-81223380[+]	2163	_	0.00397875	0.0114304	0.0122273	Genic
101928545	lncRNA	SEPT7-AS1	SEPT7 antisense RNA 1 (head to head)	NC_000007.14:35754964-35800625[-]	45662	_	0.263307	0.0896277	0.0944844	Genic
101928570	lncRNA	LOC101928570	#N/A	NC_000006.12:77069049-77317477[-]	248429	_	1.23473	0.511108	0.576201	Genic
101928572	lncRNA	LOC101928572	#N/A	NC_000019.10:2302315-2304225[+]	1911	_	0.0312356	0.0317664	0.0972405	Genic
101928617	lncRNA	LOC101928617	uncharacterized LOC101928617	NC_000012.12:92146085-92185784[+]	39700	_	0.123286	0.077304	0.0461959	Genic
201853	lncRNA	LINC00504	long intergenic non-protein coding RNA 504	NC_000004.12:14470465-14888169[-]	417705	_	0.0246525	0.0112291	0.0143804	Intergenic
101928705	lncRNA	LOC101928705	#N/A	NC_000012.12:28566406-28578259[+]	11854	_	0.034708	0.0074172	0.0096533	Intergenic
101928728	lncRNA	LOC101928728	uncharacterized LOC101928728	NC_000001.11:26691910-26694131[-]	2222	_	0.01307	0.0193436	0.0225214	Intergenic
101928736	lncRNA	MIR762HG	MIR762 host gene	NC_000016.10:30875460-30895220[+]	19761	_	0.368353	0.131916	0.211509	Genic
101928762	lncRNA	LOC101928762	#N/A	NC_000016.10:31040961-31049858[+]	8898	_	0.120762	0.0361185	0.0450002	Intergenic
284749	lncRNA	LINC00494	long intergenic non-protein coding RNA 494	NC_000020.11:48359911-48370638[+]	10728	_	0.040287	0.0112085	0.0128545	Intergenic
101928813	lncRNA	LOC101928813	#N/A	NC_000011.10:76608151-76630528[-]	22378	_	0.0182738	0.0122793	0.0215655	Intergenic
101928865	lncRNA	LOC101928865	uncharacterized LOC101928865	NC_000011.10:78423982-78429836[-]	5855	_	0.051737	0.0268586	0.0278574	Intergenic
400941	lncRNA	LINC00487	long intergenic non-protein coding RNA 487	NC_000002.12:6729168-6770311[-]	41144	_	0	0.0023686	0	Intergenic
101928932	lncRNA	LOC101928932	uncharacterized LOC101928932	NC_000009.12:138199933-138203453[-]	3521	_	1.02575	0.452205	0.870411	Intergenic
101928933	lncRNA	LOC101928933	#N/A	NC_000001.11:179926390-179954659[-]	28270	_	0.0276629	0.0101186	0.0106264	Intergenic
101928963	lncRNA	LOC101928963	#N/A	NC_000004.12:82374330-82384027[+]	9698	_	0.0135154	0.0609202	0.0836344	Intergenic
101929018	lncRNA	LOC101929018	#N/A	NC_000003.12:185458328-185480238[-]	21911	_	0.0382798	0.01522	0.0263726	Genic
101929057	lncRNA	LOC101929057	uncharacterized LOC101929057	NC_000006.12:89638532-89689481[+]	50950	_	0.0127269	0.00589207	0.00869226	Genic
101929066	lncRNA	LOC101929066	uncharacterized LOC101929066	NC_000008.11:18084868-18097651[+]	12784	_	0.260185	0.0720031	0.148093	Genic
101929072	lncRNA	MICA-AS1	MICA antisense RNA 1	NC_000006.12:31394289-31400470[-]	6182	_	0.0930881	0.0403196	0.0711908	Genic
101929145	lncRNA	PPP3CB-AS1	PPP3CB antisense RNA 1 (head to head)	NC_000010.11:73495752-73507309[+]	11558	_	0.269975	0.158655	0.193689	Genic
101929147	lncRNA	LOC101929147	uncharacterized LOC101929147	NC_000001.11:119140396-119275973[+]	135578	_	0.280163	0.123124	0.285719	Genic
101929163	lncRNA	LOC101929163	uncharacterized LOC101929163	NC_000006.12:32255173-32407730[+]	152558	_	0.101871	0.0120989	0.0382207	Genic
101929165	lncRNA	LOC101929165	uncharacterized LOC101929165	NC_000010.11:74912786-74936402[+]	23617	_	0.0996628	0.0681388	0.0784104	Genic
101929174	lncRNA	LOC101929174	#N/A	NC_000011.10:88337853-88428192[+]	90340	_	0.0714154	0.0599255	0.0524228	Genic
101929200	lncRNA	LOC101929200	#N/A	NC_000005.10:5256895-5422391[-]	165497	_	0.0517459	0.0119102	0.0235253	Genic
101929215	lncRNA	CTD-2201I18.1	uncharacterized LOC101929215	NC_000005.10:80066349-80083665[-]	17317	_	0.0393895	0.0068884	0.00549836	Genic
101929243	lncRNA	LOC101929243	uncharacterized LOC101929243	NC_000006.12:34696154-34697471[+]	1318	_	0.529302	0.881183	0.943882	Genic
101929269	lncRNA	LOC101929269	uncharacterized LOC101929269	NC_000008.11:11062652-11067089[-]	4438	_	0.0811364	0.0511682	0.0905189	Genic
101929289	lncRNA	LOC101929289	#N/A	NC_000011.10:123062471-123063231[+]	761	_	0.0246134	0.0751628	0.0896584	Intergenic
101929302	lncRNA	RFX3-AS1	RFX3 antisense RNA 1	NC_000009.12:3668086-3691756[+]	23671	_	0.206149	0.0824212	0.0986574	Genic
101929475	lncRNA	ITGB1-DT	#N/A	NC_000010.11:32958459-33082102[+]	123644	_	0.0355409	0.00631408	0.0131486	Genic
284185	lncRNA	LINC00482	long intergenic non-protein coding RNA 482	NC_000017.11:81302824-81309248[-]	6425	_	0.00617713	0.002375	0.00872817	Intergenic
101929538	lncRNA	LOC101929538	uncharacterized LOC101929538	NC_000011.10:128681240-128686922[-]	5683	_	0.17655	0.0959095	0.10708	Genic
101929547	lncRNA	LOC101929547	#N/A	NC_000020.11:19208994-19210481[-]	1488	_	0.0777637	0.00958327	0.0154488	Intergenic
100128782	lncRNA	LINC00476	long intergenic non-protein coding RNA 476	NC_000009.12:95806088-95875977[-]	69890	_	0.143559	0.0683799	0.0677011	Intergenic
79940	lncRNA	LINC00472	long intergenic non-protein coding RNA 472	NC_000006.12:71407864-71420745[-]	12882	_	0	0.000356867	0	Intergenic
101929594	lncRNA	LOC101929594	#N/A	NC_000022.11:28512986-28551489[-]	38504	_	0.028012	0.0134828	0.013141	Genic
101929602	lncRNA	IFT74-AS1	IFT74 antisense RNA 1	NC_000009.12:26955780-26956307[-]	528	_	0.0613181	0.103533	0.0372832	Genic
151477	lncRNA	LINC00471	long intergenic non-protein coding RNA 471	NC_000002.12:231508426-231514339[-]	5914	_	0	0.0023458	0	Intergenic
101929639	lncRNA	B4GALT1-AS1	B4GALT1 antisense RNA 1	NC_000009.12:33166948-33179983[+]	13036	_	0.332116	0.130873	0.32763	Genic
101929693	lncRNA	RARA-AS1	RARA antisense RNA 1	NC_000017.11:40340867-40343136[-]	2270	_	0.0231622	0.0149097	0.0466945	Genic
101929709	lncRNA	LOC101929709	uncharacterized LOC101929709	NC_000008.11:89717399-89757711[-]	40313	_	0.203716	0.146817	0.187763	Intergenic
101929715	lncRNA	LOC101929715	uncharacterized LOC101929715	NC_000002.12:10449728-10455552[+]	5825	_	0.0830681	0.0218456	0.0345991	Intergenic
101929756	lncRNA	LOC101929756	#N/A	NC_000007.14:77056-83376[+]	6321	_	0.259382	0.140409	0.310305	Intergenic
56651	lncRNA	LINC00470	long intergenic non-protein coding RNA 470	NC_000018.10:1268311-1359629[-]	91319	_	0.00477912	0	0.00173742	Intergenic
101929823	lncRNA	LOC101929823	#N/A	NC_000017.11:91530-133841[-]	42312	_	0.0860145	0.00533105	0.0248362	Genic
101929866	lncRNA	LOC101929866	#N/A	NC_000020.11:45178478-45191638[+]	13161	_	0.0816295	0.0125807	0.0444447	Intergenic
101929882	lncRNA	LOC101929882	uncharacterized LOC101929882	NC_000002.12:10041553-10043401[-]	1849	_	0.246471	0.0701878	0.0593135	Intergenic
101929977	lncRNA	LOC101929977	#N/A	NC_000005.10:10339378-10354125[-]	14748	_	0.0122364	0.0119936	0.00940161	Genic
101930085	lncRNA	LOC101930085	uncharacterized LOC101930085	NC_000007.14:35695206-35699413[+]	4208	_	0.0639214	0.0448541	0.0629524	Genic
101930112	lncRNA	LOC101930112	#N/A	NC_000016.10:89490733-89499285[+]	8553	_	0.157555	0.0572724	0.121447	Intergenic
101930129	lncRNA	LOC101930129	#N/A	NC_000011.10:172486-174993[-]	2508	_	0.0279326	0.00842832	0.0233665	Intergenic
101930370	lncRNA	LOC101930370	uncharacterized LOC101930370	NC_000004.12:173131933-173169652[-]	37720	_	0.030239	0.0080214	0.0103794	Genic
102060282	lncRNA	RASSF1-AS1	RASSF1 antisense RNA 1	NC_000003.12:50337511-50338300[+]	790	_	0.0498566	0.041458	0.0805286	Genic
102157401	lncRNA	PCBP2-OT1	PCBP2 overlapping transcript 1	NC_000012.12:53464468-53465057[+]	590	_	0.124657	0.140945	0.186711	Genic
102606465	lncRNA	LOC102606465	uncharacterized LOC102606465	NC_000001.11:101025846-101087379[+]	61534	_	0.229617	0.0942185	0.069612	Intergenic
102723166	lncRNA	STAM-AS1	STAM antisense RNA 1 (head to head)	NC_000010.11:17641284-17643918[-]	2635	_	0.025229	0.0112634	0.00864591	Genic
102723324	lncRNA	LOC102723324	#N/A	NC_000009.12:121370445-121401567[+]	31123	_	0.71033	0.355863	0.382603	Intergenic
283982	lncRNA	LINC00469	long intergenic non-protein coding RNA 469	NC_000017.11:73749270-73828537[-]	79268	_	0	0.000609817	0	Intergenic
102723409	lncRNA	LOC102723409	#N/A	NC_000006.12:129493129-129558643[-]	65515	_	0.147214	0.187355	0.362644	Genic
84791	lncRNA	LINC00467	long intergenic non-protein coding RNA 467	NC_000001.11:211382755-211432535[+]	49781	_	0.235678	0.0740446	0.259323	Intergenic
102723446	lncRNA	LOC102723446	#N/A	NC_000007.14:45940555-46038224[+]	97670	_	0.0246634	0.00402498	0.00554591	Genic
102723458	lncRNA	LOC102723458	#N/A	NC_000004.12:88411483-88467988[-]	56506	_	0.107583	0.0638048	0.083373	Genic
102723507	lncRNA	LOC102723507	#N/A	NC_000022.11:36121181-36136487[-]	15307	_	0.0166282	0.00667422	0.00726335	Intergenic
102723508	lncRNA	KANTR	KDM5C adjacent transcript	NC_000023.11:53094157-53148008[+]	53852	_	0.0927009	0.038829	0.051883	Genic
102723564	lncRNA	LOC102723564	#N/A	NC_000015.10:23303886-23314566[+]	10681	_	0.0450728	0.0146232	0.0230617	Intergenic
102723591	lncRNA	LOC102723591	#N/A	NC_000023.11:153761627-153766468[-]	4842	_	0.204886	0.181037	0.227968	Genic
102723654	lncRNA	LOC102723654	#N/A	NC_000005.10:129114353-129393969[+]	279617	_	0.0211369	0.00285652	0.00123888	Genic
102723665	lncRNA	LOC102723665	uncharacterized LOC102723665	NC_000010.11:96830632-96832458[-]	1827	_	0.0672364	0.0380313	0.101127	Genic
102723694	lncRNA	LOC102723694	#N/A	NC_000008.11:134789112-134813503[-]	24392	_	0.0890746	0.039906	0.0627985	Genic
645323	lncRNA	LINC00461	long intergenic non-protein coding RNA 461	NC_000005.10:88538266-88691041[-]	152776	_	0	0.000146367	0	Intergenic
102723703	lncRNA	LOC102723703	uncharacterized LOC102723703	NC_000010.11:80531250-80533123[+]	1874	_	0.0156971	0.0291284	0.0315311	Intergenic
102723741	lncRNA	LOC102723741	#N/A	NC_000005.10:132418776-132427075[-]	8300	_	0.136604	0.09833	0.162746	Genic
107984570	lncRNA	LINC00444	#N/A	NC_000013.11:47903806-47935824[-]	32019	_	0.0327279	0.0306256	0.0267766	Intergenic
102723922	lncRNA	LOC102723922	#N/A	NC_000006.12:259965-291256[-]	31292	_	0.082671	0.0361041	0.0464276	Intergenic
100862704	lncRNA	LINC00441	long intergenic non-protein coding RNA 441	NC_000013.11:48296513-48303661[-]	7149	_	0	0.00434685	0	Intergenic
102723983	lncRNA	LOC102723983	#N/A	NC_000012.12:51270285-51271362[+]	1078	_	0.0709446	0.0233778	0.0152342	Genic
102724104	lncRNA	LOC102724104	#N/A	NC_000003.12:39232520-39263233[+]	30714	_	0.157868	0.0311856	0.0354523	Intergenic
102724122	lncRNA	LOC102724122	#N/A	NC_000005.10:57482960-57535470[+]	52511	_	0.117358	0.108304	0.0686845	Intergenic
102724238	lncRNA	LOC102724238	uncharacterized LOC102724238	NC_000009.12:62374481-62376870[-]	2390	_	0.012722	0.0150935	0.0177585	Genic
102724316	lncRNA	SVIL-AS1	SVIL antisense RNA 1	NC_000010.11:29409534-29487856[+]	78323	_	0.328107	0.156316	0.383497	Genic
102724322	lncRNA	LOC102724322	#N/A	NC_000009.12:36257844-36318465[+]	60622	_	0.0242092	0.0107056	0.0196255	Genic
102724330	lncRNA	LOC102724330	#N/A	NC_000008.11:51899325-51949886[+]	50562	_	0.100344	0.044932	0.0548847	Intergenic
102724339	lncRNA	CTB-30L5.1	#N/A	NC_000007.14:106569858-106732460[-]	162603	_	0.0517884	0.0605732	0.0869717	Genic
102724443	lncRNA	LOC102724443	#N/A	NC_000006.12:104336518-104359776[-]	23259	_	0.0267076	0.0311164	0.0147971	Intergenic
102724517	lncRNA	LOC102724517	#N/A	NC_000017.11:28045748-28048926[+]	3179	_	0.355479	0.232792	0.52815	Genic
102724528	lncRNA	LOC102724528	#N/A	NC_000001.11:172393992-172456470[-]	62479	_	0.0125964	0.0188152	0.0343393	Genic
102724532	lncRNA	LOC102724532	uncharacterized LOC102724532	NC_000017.11:47891229-47895816[-]	4588	_	0.104553	0.0564484	0.0807852	Intergenic
102724615	lncRNA	LOC102724615	#N/A	NC_000018.10:13542017-13544942[+]	2926	_	0.0658749	0.032961	0.0223191	Genic
102724625	lncRNA	LOC102724625	#N/A	NC_000017.11:32087550-32091785[-]	4236	_	0.00767525	0.0139038	0.0118687	Intergenic
102724745	lncRNA	LOC102724745	#N/A	NC_000018.10:58658510-58669343[+]	10834	_	0.0405928	0.00145733	0.00511065	Intergenic
102724748	lncRNA	LOC102724748	#N/A	NC_000005.10:96776547-96785999[+]	9453	_	0.29659	0.149912	0.248696	Genic
102724749	lncRNA	LOC102724749	#N/A	NC_000006.12:23336746-23405465[+]	68720	_	0.0331814	0.0452404	0.0512923	Intergenic
102724765	lncRNA	LOC102724765	#N/A	NC_000006.12:25014952-25036447[-]	21496	_	80.1661	81.5964	96.2758	Genic
102724780	lncRNA	LOC102724780	#N/A	NC_000004.12:67789586-67801237[+]	11652	_	0.0408535	0.00164305	0.00367977	Intergenic
102724808	lncRNA	LOC102724808	#N/A	NC_000003.12:193647187-193683279[-]	36093	_	45.4343	47.3336	52.248	Genic
102724814	lncRNA	LOC102724814	uncharacterized LOC102724814	NC_000014.9:23561097-23568076[+]	6980	_	0.125558	0.0518726	0.0605778	Genic
102724827	lncRNA	MIATNB	MIAT neighbor (non-protein coding)	NC_000022.11:26672843-26780893[+]	108051	_	0.145989	0.0501566	0.0816749	Genic
102724850	lncRNA	LOC102724850	#N/A	NC_000017.11:36073306-36089856[+]	16551	_	0.0355086	0.0138088	0.0211365	Genic
102724851	lncRNA	LOC102724851	#N/A	NC_000006.12:26670784-26687841[+]	17058	_	0.024872	0.00463655	0.00543035	Intergenic
102724857	lncRNA	LOC102724857	#N/A	NC_000001.11:184538781-184543189[+]	4409	_	0.070349	0.0337526	0.0505762	Genic
102725044	lncRNA	LOC102725044	#N/A	NC_000014.9:24271228-24298855[+]	27628	_	0.0909407	0.065861	0.0791251	Genic
102725082	lncRNA	LOC102725082	#N/A	NC_000002.12:212933797-212991607[-]	57811	_	0.012741	0.0031297	0.00292499	Genic
102725201	lncRNA	LOC102725201	#N/A	NC_000020.11:35476374-35491082[-]	14709	_	0.213851	0.224901	0.242904	Genic
102725258	lncRNA	LOC102725258	#N/A	NC_000012.12:48196672-48252760[+]	56089	_	0.0234558	0.00420677	0.00280195	Genic
103091865	lncRNA	BRWD1-AS2	BRWD1 antisense RNA 2	NC_000021.9:39313907-39314915[+]	1009	_	0.186116	0.101944	0.100924	Genic
103091866	lncRNA	LOC103091866	uncharacterized LOC103091866	NC_000001.11:145168405-145216071[-]	47667	_	0.214823	0.11794	0.169515	Intergenic
103344931	lncRNA	LOC103344931	uncharacterized LOC103344931	NC_000010.11:112823496-112827732[+]	4237	_	0.079433	0.069917	0.0335353	Genic
104355135	lncRNA	LINC00431	long intergenic non-protein coding RNA 431	NC_000013.11:110966027-110990602[+]	24576	_	0.0654789	0.0280745	0.0263646	Intergenic
103611081	lncRNA	LOC103611081	uncharacterized LOC103611081	NC_000011.10:130866249-130870247[-]	3999	_	0.116072	0.052153	0.0902327	Genic
103611157	lncRNA	TGFB2-OT1	TGFB2 overlapping transcript 1	NC_000001.11:218442626-218443995[+]	1370	_	1.17761	0.656361	1.25013	Genic
100188949	lncRNA	LINC00426	long intergenic non-protein coding RNA 426	NC_000013.11:30340266-30373914[-]	33649	_	0.0979254	0.0450248	0.0419163	Intergenic
104326052	lncRNA	NRIR	negative regulator of interferon response (non-protein coding)	NC_000002.12:6828554-6840464[-]	11911	_	0	0.0881447	0.0214042	Genic
100874164	lncRNA	LINC00417	long intergenic non-protein coding RNA 417	NC_000013.11:18738100-18740099[-]	2000	_	0	0.0049457	0.011712	Intergenic
104355426	lncRNA	LENG8-AS1	LENG8 antisense RNA 1	NC_000019.10:54444816-54449038[-]	4223	_	0.104696	0.0999385	0.137719	Genic
104472715	lncRNA	SNHG14	small nucleolar RNA host gene 14	NC_000015.10:24823608-25419462[+]	595855	_	0.0699319	0.107858	0.0976522	Genic
102723332	lncRNA	LINC00412	long intergenic non-protein coding RNA 412	NC_000013.11:27236282-27237257[-]	976	_	0.0202038	0.0256764	0.0225567	Intergenic
104472848	lncRNA	IRAIN	IGF1R antisense imprinted non-protein coding RNA	NC_000015.10:98645863-98651221[-]	5359	_	0.004563	0.0070115	0.00823441	Genic
105221694	lncRNA	BISPR	BST2 interferon stimulated positive regulator (non-protein coding)	NC_000019.10:17405686-17415736[+]	10051	_	0.249845	0.153369	0.208661	Genic
105369151	lncRNA	LOC105369151	#N/A	NC_000012.12:22324379-22333990[-]	9612	_	0.0158852	0.0047943	0.0138433	Genic
105369161	lncRNA	LOC105369161	#N/A	NC_000022.11:46944660-46956082[+]	11423	_	0.250777	0.121286	0.174363	Genic
105369180	lncRNA	LOC105369180	#N/A	NC_000008.11:22656195-22666350[-]	10156	_	0.0945824	0.142762	0.152369	Genic
105369194	lncRNA	LOC105369194	#N/A	NC_000003.12:123692816-123717042[+]	24227	_	2.846	1.89647	2.86404	Genic
105369228	lncRNA	LOC105369228	#N/A	NC_000005.10:69975859-69997479[+]	21621	_	0.157528	0.0609116	0.0710975	Genic
105369312	lncRNA	LOC105369312	#N/A	NC_000011.10:57392990-57404155[-]	11166	_	0.0132264	0.0207219	0.0419631	Intergenic
105369313	lncRNA	LOC105369313	#N/A	NC_000011.10:58493936-58514755[-]	20820	_	0.044853	0.0118092	0.0107041	Genic
105369319	lncRNA	LOC105369319	#N/A	NC_000011.10:60159241-60164400[-]	5160	_	0.0970254	0.0301316	0.0450316	Intergenic
105369325	lncRNA	LOC105369325	#N/A	NC_000011.10:61028863-61092504[-]	63642	_	0.0233	0.00858048	0.0036592	Intergenic
105369354	lncRNA	LOC105369354	#N/A	NC_000011.10:66184325-66190236[+]	5912	_	0.126121	0.0400845	0.0406441	Genic
105369363	lncRNA	LOC105369363	#N/A	NC_000011.10:68272085-68284643[+]	12559	_	0.194671	0.405604	0.239363	Intergenic
105369364	lncRNA	LOC105369364	#N/A	NC_000011.10:68870405-68874548[+]	4144	_	0.0753697	0.0218048	0.0502205	Intergenic
105369436	lncRNA	LOC105369436	#N/A	NC_000011.10:94633324-94657461[+]	24138	_	0.00429562	0.003403	0.00248801	Intergenic
105369464	lncRNA	LOC105369464	#N/A	NC_000011.10:103861308-103906870[-]	45563	_	0.017055	0.00380307	0.00246626	Intergenic
105369482	lncRNA	LOC105369482	#N/A	NC_000011.10:109741620-109823864[-]	82245	_	0.284255	0.072004	0.0353981	Intergenic
105369483	lncRNA	LOC105369483	#N/A	NC_000011.10:109859558-109860608[-]	1051	_	0.337188	0.0856052	0.241476	Intergenic
105369484	lncRNA	LOC105369484	#N/A	NC_000011.10:109946550-109972995[+]	26446	_	0.260811	0.316752	0.366497	Intergenic
105369536	lncRNA	LOC105369536	#N/A	NC_000011.10:121439082-121453013[-]	13932	_	0.05209	0.012948	0.0144992	Genic
105369621	lncRNA	LOC105369621	#N/A	NC_000012.12:5880913-5914023[+]	33111	_	0.0385597	0.0397424	0.0546781	Genic
100507612	lncRNA	LINC00402	long intergenic non-protein coding RNA 402	NC_000013.11:74231444-74259976[+]	28533	_	0.082025	0.0229237	0.0231245	Intergenic
105369656	lncRNA	LOC105369656	#N/A	NC_000012.12:10280338-10291348[-]	11011	_	0.750964	0.1562	0.158234	Genic
102157400	lncRNA	LINC00384	long intergenic non-protein coding RNA 384	NC_000013.11:30151886-30153074[-]	1189	_	0	0	0.0022652	Intergenic
105369748	lncRNA	LOC105369748	#N/A	NC_000012.12:47706059-47740134[+]	34076	_	0.0997299	0.0273576	0.096619	Genic
105369767	lncRNA	LOC105369767	#N/A	NC_000012.12:51322368-51324015[-]	1648	_	1.92749	2.27041	3.84102	Genic
105369772	lncRNA	LOC105369772	#N/A	NC_000012.12:52625676-52630770[-]	5095	_	0.076517	0.0231494	0.0500865	Intergenic
105369783	lncRNA	LOC105369783	#N/A	NC_000012.12:57836625-57843761[+]	7137	_	0.0818912	0.0469285	0.0684622	Genic
105369816	lncRNA	LOC105369816	#N/A	NC_000012.12:67678184-67692216[+]	14033	_	0.0975276	0.0378456	0.0433615	Intergenic
105369957	lncRNA	LOC105369957	#N/A	NC_000012.12:105372114-105412881[+]	40768	_	0.0793086	0.0653813	0.242826	Intergenic
105370027	lncRNA	LOC105370027	#N/A	NC_000012.12:119387991-119668203[-]	280213	_	0.391521	0.174719	0.330632	Genic
105370108	lncRNA	LOC105370108	#N/A	NC_000013.11:22057783-22155585[+]	97803	_	0.006055	0.00404987	0.00493667	Intergenic
105370195	lncRNA	LOC105370195	#N/A	NC_000013.11:47266126-47270340[+]	4215	_	0.698317	0.217548	0.326518	Intergenic
105370198	lncRNA	LOC105370198	#N/A	NC_000013.11:48108045-48222315[-]	114271	_	0.0342291	0.0192093	0.0100347	Intergenic
105370259	lncRNA	LOC105370259	#N/A	NC_000013.11:74288036-74408803[+]	120768	_	0.0439402	0.0167078	0.0174942	Genic
105370276	lncRNA	LOC105370276	#N/A	NC_000013.11:80356916-80366052[+]	9137	_	0.03889	0.0243457	0.0178719	Intergenic
105370397	lncRNA	LOC105370397	#N/A	NC_000014.9:20788609-20810034[+]	21426	_	0.00906363	0.00678645	0.00744236	Genic
105370449	lncRNA	LOC105370449	#N/A	NC_000014.9:34551437-34557453[-]	6017	_	0.0912736	0.0659619	0.0547084	Intergenic
105370461	lncRNA	LOC105370461	#N/A	NC_000014.9:39432349-39727709[+]	295361	_	0.0089835	0.00480197	0.00387866	Genic
105370462	lncRNA	LOC105370462	#N/A	NC_000014.9:40318478-40390514[+]	72037	_	0.337414	0.173266	0.0681976	Intergenic
105370504	lncRNA	LOC105370504	#N/A	NC_000014.9:53350170-53766602[+]	416433	_	0.00700813	0.00487815	0.00334839	Genic
105370532	lncRNA	LOC105370532	#N/A	NC_000014.9:63642022-63665662[+]	23641	_	0.323818	0.0720334	0.147715	Intergenic
105370560	lncRNA	LOC105370560	#N/A	NC_000014.9:73027700-73059472[-]	31773	_	0.00407362	0.0242003	0.0118273	Genic
105370567	lncRNA	LOC105370567	#N/A	NC_000014.9:74651276-74657679[-]	6404	_	0.0932488	0.0383144	0.0986945	Intergenic
105370569	lncRNA	LOC105370569	#N/A	NC_000014.9:74839193-74842019[+]	2827	_	0.136093	0.0628786	0.101119	Intergenic
105370594	lncRNA	LOC105370594	#N/A	NC_000014.9:81167631-81171831[+]	4201	_	0.0387429	0.026042	0.0279102	Intergenic
105370596	lncRNA	LOC105370596	#N/A	NC_000014.9:81014066-81026782[-]	12717	_	0.0967351	0.0271084	0.0179988	Genic
105370620	lncRNA	LOC105370620	#N/A	NC_000014.9:90524432-90537167[-]	12736	_	0.00392375	0.00522305	0.0159176	Intergenic
105370651	lncRNA	LOC105370651	#N/A	NC_000014.9:97705989-97802275[+]	96287	_	0.0830617	0.0210452	0.01979	Genic
105370660	lncRNA	LOC105370660	#N/A	NC_000014.9:99279783-99287493[-]	7711	_	0.115833	0.0236881	0.0384033	Intergenic
105370721	lncRNA	LOC105370721	#N/A	NC_000015.10:22290064-22294417[+]	4354	_	0.0959296	0.00541373	0.00441544	Intergenic
105370780	lncRNA	LOC105370780	#N/A	NC_000015.10:39166338-39182869[+]	16532	_	0.0139956	0.00392413	0.0156785	Intergenic
105370781	lncRNA	LOC105370781	#N/A	NC_000015.10:39017563-39027532[+]	9970	_	0.103439	0.0501776	0.21702	Intergenic
105370877	lncRNA	LOC105370877	#N/A	NC_000015.10:70079656-70088887[-]	9232	_	0.145173	0.287366	0.479534	Genic
105371028	lncRNA	LOC105371028	#N/A	NC_000015.10:101494780-101501769[-]	6990	_	0.0570907	0.0541796	0.147844	Intergenic
105371058	lncRNA	LOC105371058	#N/A	NC_000016.10:3077272-3087993[-]	10722	_	0.111153	0.0302844	0.0521103	Intergenic
105371087	lncRNA	LOC105371087	#N/A	NC_000016.10:12372680-12376047[+]	3368	_	0.0250557	0.0144083	0.021975	Genic
105371088	lncRNA	LOC105371088	#N/A	NC_000016.10:12651918-12653373[-]	1456	_	0.222629	0.186048	0.360629	Intergenic
105371224	lncRNA	LOC105371224	#N/A	NC_000001.11:148442576-148459396[-]	16821	_	0.293876	0.158202	0.216747	Genic
105371227	lncRNA	LOC105371227	#N/A	NC_000001.11:148152352-148158546[+]	6195	_	0.007356	0.00581638	0.0097157	Intergenic
105371271	lncRNA	LOC105371271	#N/A	NC_000016.10:54052918-54057437[+]	4520	_	0.0382347	0.0210106	0.0277683	Genic
105371354	lncRNA	LOC105371354	#N/A	NC_000016.10:78607223-78613931[+]	6709	_	0.0920657	0.0482315	0.0645007	Genic
105371362	lncRNA	LOC105371362	#N/A	NC_000016.10:81629894-81632331[-]	2438	_	7.82229	6.02345	7.69332	Genic
144766	lncRNA	LINC00355	long intergenic non-protein coding RNA 355	NC_000013.11:63986371-64076011[-]	89641	_	0	0.00443688	0.0471382	Intergenic
105371457	lncRNA	LOC105371457	#N/A	NC_000001.11:157652488-157660097[-]	7610	_	0.146135	0.0133076	0.170469	Intergenic
105371468	lncRNA	LOC105371468	#N/A	NC_000001.11:160535647-160571133[+]	35487	_	0.240295	0.347106	0.0785117	Genic
105371480	lncRNA	LOC105371480	#N/A	NC_000017.11:1148235-1151904[-]	3670	_	0.126324	0.0977567	0.123018	Genic
105371512	lncRNA	LOC105371512	#N/A	NC_000017.11:7131217-7140890[+]	9674	_	0.0522532	0.0175293	0.0138609	Intergenic
105371589	lncRNA	LOC105371589	#N/A	NC_000017.11:21491599-21521462[+]	29864	_	0.00735525	0.00361023	0.00693952	Genic
105371622	lncRNA	LOC105371622	#N/A	NC_000001.11:174991734-174999352[-]	7619	_	0.0504036	0.0696167	0.0832848	Genic
105371637	lncRNA	LOC105371637	#N/A	NC_000001.11:180415385-180427734[-]	12350	_	0.0410656	0.0226659	0.0356231	Genic
105371655	lncRNA	LOC105371655	#N/A	NC_000001.11:187253891-187255797[+]	1907	_	0.233724	0.524277	0.438808	Genic
105371661	lncRNA	LOC105371661	#N/A	NC_000001.11:192106224-192148110[+]	41887	_	15.6601	17.4799	14.9837	Intergenic
105371692	lncRNA	LOC105371692	#N/A	NC_000001.11:204559586-204628442[+]	68857	_	0.103616	0.0259278	0.0549941	Genic
105371705	lncRNA	LOC105371705	#N/A	NC_000017.11:27404426-27414099[-]	9674	_	0.9952	0.527107	0.513794	Intergenic
283487	lncRNA	LINC00346	long intergenic non-protein coding RNA 346	NC_000013.11:110863987-110870308[-]	6322	_	0.0838554	0.0407867	0.506047	Intergenic
105371711	lncRNA	LOC105371711	#N/A	NC_000017.11:28132682-28144415[+]	11734	_	1.13901	0.770295	3.05699	Genic
150759	lncRNA	LINC00342	long intergenic non-protein coding RNA 342	NC_000002.12:95807052-95826981[-]	19930	_	0.235458	0.106855	0.161009	Intergenic
105371745	lncRNA	LOC105371745	#N/A	NC_000017.11:35884737-35885860[+]	1124	_	0.11132	0.0651854	0.298457	Intergenic
105371795	lncRNA	LOC105371795	uncharacterized LOC105371795	NC_000017.11:45168805-45171485[-]	2681	_	0.0274146	0.0189641	0.0406948	Genic
105371816	lncRNA	LOC105371816	#N/A	NC_000017.11:49224729-49227383[+]	2655	_	0.103849	0.0291278	0.0478271	Genic
105371839	lncRNA	LOC105371839	#N/A	NC_000017.11:57771782-57838202[-]	66421	_	0.0337609	0.00666267	0.0133748	Genic
105371871	lncRNA	LOC105371871	#N/A	NC_000017.11:68157927-68161227[+]	3301	_	0.0583744	0.0341742	0.0363045	Genic
105371934	lncRNA	LOC105371934	#N/A	NC_000017.11:40315193-40322894[-]	7702	_	0.008114	0.0153078	0.0114303	Genic
105371941	lncRNA	LOC105371941	#N/A	NC_000017.11:82454374-82458415[-]	4042	_	0.0756636	0.0476428	0.0271592	Genic
105371981	lncRNA	LOC105371981	#N/A	NC_000018.10:9708672-9716356[+]	7685	_	0.200841	0.344582	0.507111	Genic
105372055	lncRNA	LOC105372055	#N/A	NC_000018.10:32772136-32781845[+]	9710	_	0.0180104	0.00248678	0.00127403	Genic
105372092	lncRNA	LOC105372092	#N/A	NC_000018.10:45685481-45723273[+]	37793	_	0.0202705	0.00667315	0.0038052	Genic
105372117	lncRNA	LOC105372117	#N/A	NC_000018.10:51023373-51030479[-]	7107	_	0.0224419	0.0083575	0.0106194	Genic
105372118	lncRNA	LOC105372118	#N/A	NC_000018.10:51192906-51196549[-]	3644	_	0.147415	0.235047	0.28609	Genic
105372141	lncRNA	LOC105372141	#N/A	NC_000018.10:57731828-57738674[+]	6847	_	0.110786	0.0433964	0.0425774	Genic
105372178	lncRNA	LOC105372178	#N/A	NC_000018.10:69712804-69737246[-]	24443	_	0.01813	0.00617138	0.00207378	Genic
105372300	lncRNA	LOC105372300	#N/A	NC_000019.10:18319517-18321997[+]	2481	_	0.282778	0.035603	0.0650903	Genic
105372379	lncRNA	LOC105372379	#N/A	NC_000019.10:35205058-35216008[+]	10951	_	0.19469	0.103819	0.0713751	Intergenic
105372401	lncRNA	LOC105372401	#N/A	NC_000019.10:41307121-41310412[-]	3292	_	0.14318	0.114387	0.242506	Genic
105372446	lncRNA	LOC105372446	#N/A	NC_000019.10:51386833-51412544[+]	25712	_	0.0703576	0.022759	0.0211422	Genic
105372476	lncRNA	ZNF460-AS1	ZNF460 antisense RNA 1	NC_000019.10:57267193-57280334[-]	13142	_	0.0664154	0.109426	0.186463	Genic
105372482	lncRNA	LOC105372482	#N/A	NC_000019.10:58257273-58278791[-]	21519	_	0.0312529	0.0071	0.0156837	Genic
105372511	lncRNA	LOC105372511	#N/A	NC_000020.11:4777719-4779351[-]	1633	_	0.131065	0.0862625	0.204282	Intergenic
105372553	lncRNA	LOC105372553	#N/A	NC_000020.11:20022505-20024978[+]	2474	_	0.0968559	0.059488	0.100337	Genic
105372582	lncRNA	LOC105372582	uncharacterized LOC105372582	NC_000020.11:25751208-25756050[+]	4843	_	0.0307783	0.0261288	0.0345153	Intergenic
105372709	lncRNA	LOC105372709	#N/A	NC_000020.11:62402231-62406894[-]	4664	_	0.00267562	0.00953615	0.00888715	Genic
29092	lncRNA	LINC00339	long intergenic non-protein coding RNA 339	NC_000001.11:22025191-22031224[+]	6034	_	0.28069	0.139301	0.110627	Intergenic
105372767	lncRNA	LOC105372767	#N/A	NC_000021.9:29176433-29183599[+]	7167	_	0.10301	0.0337534	0.0512268	Intergenic
105372768	lncRNA	LOC105372768	#N/A	NC_000021.9:29555719-29577698[+]	21980	_	0.06191	0.0119534	0.00851344	Genic
105372903	lncRNA	LOC105372903	#N/A	NC_000001.11:211605399-211609570[-]	4172	_	0.116308	0.0777328	0.0996382	Intergenic
105372906	lncRNA	LOC105372906	#N/A	NC_000001.11:212430038-212432806[-]	2769	_	1.29425	0.928762	0.764081	Intergenic
105372964	lncRNA	LOC105372964	#N/A	NC_000022.11:25633166-25638788[+]	5623	_	0.32662	0.182987	0.324364	Genic
105372976	lncRNA	LOC105372976	#N/A	NC_000022.11:26794348-26803028[+]	8681	_	0.0651979	0.0288581	0.0283725	Intergenic
105372989	lncRNA	LOC105372989	#N/A	NC_000022.11:30420758-30423948[-]	3191	_	0.0544994	0.0215606	0.0224955	Genic
105373077	lncRNA	LOC105373077	#N/A	NC_000022.11:46734612-46736851[-]	2240	_	0.182786	0.226755	0.408111	Genic
105373089	lncRNA	LOC105373089	#N/A	NC_000022.11:49538002-49541592[-]	3591	_	0.1066	0.0405323	0.0333626	Genic
105373105	lncRNA	LOC105373105	#N/A	NC_000024.10:1732484-1744606[+]	12123	_	0.05526	0.0274921	0.0427231	Intergenic
105373117	lncRNA	LOC105373117	#N/A	NC_000001.11:226690172-226698242[-]	8071	_	0.0942431	0.0433251	0.0799377	Genic
105373172	lncRNA	LOC105373172	#N/A	NC_000001.11:232042835-232058744[+]	15910	_	0.0143973	0.0087171	0.0140305	Intergenic
105373194	lncRNA	LOC105373194	#N/A	NC_000023.11:47204974-47218656[-]	13683	_	0.251732	0.0787498	0.159392	Genic
105373195	lncRNA	LOC105373195	#N/A	NC_000023.11:49139605-49156257[-]	16653	_	0.0648694	0.0101177	0.0289345	Genic
105373204	lncRNA	LOC105373204	#N/A	NC_000023.11:51321821-51396183[-]	74363	_	0.0385211	0.017863	0.0218479	Genic
105373255	lncRNA	LOC105373255	#N/A	NC_000001.11:243494789-243496657[-]	1869	_	0.0280501	0.0159219	0.031004	Genic
105373262	lncRNA	LOC105373262	#N/A	NC_000001.11:244230506-244325182[-]	94677	_	0.111092	0.0546927	0.0898607	Intergenic
105373264	lncRNA	LOC105373264	#N/A	NC_000001.11:244431303-244432537[-]	1235	_	0.294544	0.18257	0.438633	Genic
105373281	lncRNA	LOC105373281	#N/A	NC_000001.11:223677818-223708362[-]	30545	_	0.114389	0.0239746	0.0626633	Genic
105373284	lncRNA	LOC105373284	#N/A	NC_000023.11:81361516-81428664[+]	67149	_	0.0162551	0.00299117	0.00348889	Intergenic
105373331	lncRNA	LOC105373331	#N/A	NC_000023.11:124380907-124389830[+]	8924	_	0.106153	0.0896974	0.193874	Genic
284029	lncRNA	LINC00324	long intergenic non-protein coding RNA 324	NC_000017.11:8220630-8224043[-]	3414	_	0.27249	0.149996	0.18519	Intergenic
105373366	lncRNA	IDS2	#N/A	NC_000023.11:149511554-149526523[-]	14970	_	0.0535	0.0228845	0.0356915	Intergenic
105373386	lncRNA	LOC105373386	#N/A	NC_000023.11:154333699-154347906[-]	14208	_	0.00973088	0.00427522	0.00306995	Intergenic
105373444	lncRNA	LOC105373444	#N/A	NC_000002.12:16467782-16478580[-]	10799	_	0.0479297	0.0752237	0.00957361	Intergenic
105373456	lncRNA	LOC105373456	#N/A	NC_000002.12:18560545-18943943[+]	383399	_	0.0415748	0.0199152	0.0225725	Genic
105373510	lncRNA	LOC105373510	#N/A	NC_000002.12:101023402-101024307[+]	906	_	0.19681	0.0639487	0.105665	Genic
105373608	lncRNA	LOC105373608	#N/A	NC_000002.12:127424700-127473707[-]	49008	_	0.0284587	0.00397152	0.00486461	Genic
105373618	lncRNA	LOC105373618	#N/A	NC_000002.12:130386287-130393729[+]	7443	_	0.0434484	0.00423425	0.00777682	Intergenic
105373629	lncRNA	LOC105373629	#N/A	NC_000002.12:134718292-134722526[+]	4235	_	0.116256	0.129276	0.22493	Genic
105373656	lncRNA	LOC105373656	uncharacterized LOC105373656	NC_000002.12:144523544-144524444[-]	901	_	0.153259	0.106559	0.221274	Genic
105373711	lncRNA	LOC105373711	#N/A	NC_000002.12:157392463-157404882[-]	12420	_	0.353721	0.599081	1.29003	Intergenic
105373715	lncRNA	LOC105373715	#N/A	NC_000002.12:158577391-158589218[+]	11828	_	0.0297429	0.0224819	0.033131	Genic
105373730	lncRNA	LOC105373730	#N/A	NC_000002.12:165821977-165848198[-]	26222	_	0.0430093	0.0093783	0.0201057	Intergenic
105373774	lncRNA	LOC105373774	#N/A	NC_000002.12:183211101-183219628[+]	8528	_	0.0324735	0.00584803	0.00292372	Intergenic
105373785	lncRNA	LOC105373785	#N/A	NC_000002.12:186420570-186486203[-]	65634	_	0.07169	0.0237405	0.0157098	Genic
105373802	lncRNA	LOC105373802	#N/A	NC_000002.12:190438788-190446113[-]	7326	_	0.0416238	0.00900388	0.014366	Genic
105373813	lncRNA	LOC105373813	#N/A	NC_000002.12:192028279-192046172[+]	17894	_	0.0229059	0.00909595	0.019209	Genic
105373826	lncRNA	LOC105373826	#N/A	NC_000002.12:197215837-197218771[-]	2935	_	0.322571	0.106044	0.155039	Genic
105373830	lncRNA	LOC105373830	#N/A	NC_000002.12:198562230-198572685[+]	10456	_	0.183016	0.0641049	0.0515681	Genic
105373853	lncRNA	MYOSLID	myocardin-induced smooth muscle lncRNA, inducer of differentiation	NC_000002.12:207239811-207245887[+]	6077	_	2.01371	1.02973	0.943584	Genic
105373880	lncRNA	LOC105373880	#N/A	NC_000002.12:218316523-218318603[+]	2081	_	0.994666	0.832322	1.03516	Genic
105373881	lncRNA	LOC105373881	#N/A	NC_000002.12:218305547-218322038[-]	16492	_	0.041199	0.0368858	0.0188864	Genic
105374010	lncRNA	LOC105374010	#N/A	NC_000003.12:100021012-100034855[+]	13844	_	0.0654901	0.0294581	0.0344475	Genic
105374140	lncRNA	LOC105374140	#N/A	NC_000003.12:144231596-144478093[+]	246498	_	0.00965013	0.0019318	0.00110468	Genic
105374164	lncRNA	LOC105374164	#N/A	NC_000003.12:153178749-153252043[+]	73295	_	0.0587602	0.0686735	0.07972	Genic
29931	lncRNA	LINC00312	long intergenic non-protein coding RNA 312	NC_000003.12:8571782-8574668[+]	2887	_	0	0	0.00262615	Intergenic
105374181	lncRNA	LOC105374181	#N/A	NC_000003.12:158864158-158873236[+]	9079	_	0.071723	0.0248277	0.0507384	Intergenic
105374187	lncRNA	LOC105374187	#N/A	NC_000003.12:161263152-161285627[+]	22476	_	0.00803075	0.0027534	0.00225914	Intergenic
105374224	lncRNA	LOC105374224	#N/A	NC_000003.12:173206578-173260549[+]	53972	_	1.74307	1.19972	1.23123	Intergenic
105374296	lncRNA	LOC105374296	#N/A	NC_000003.12:195148459-195151311[-]	2853	_	0.0388103	0.0154562	0.0194052	Genic
105374298	lncRNA	LOC105374298	#N/A	NC_000003.12:195636885-195652291[+]	15407	_	0.025094	0.0122803	0.0127876	Genic
105374333	lncRNA	LOC105374333	#N/A	NC_000002.12:26074667-26093870[+]	19204	_	0.204895	0.129082	0.297493	Genic
105374334	lncRNA	LOC105374334	#N/A	NC_000002.12:26299049-26312862[+]	13814	_	0.0142053	0.00306875	0.00435287	Genic
105374363	lncRNA	LOC105374363	#N/A	NC_000002.12:27356246-27358664[+]	2419	_	0.0795183	0.0288765	0.0442474	Genic
105374369	lncRNA	LOC105374369	#N/A	NC_000002.12:27942452-27943504[+]	1053	_	0.0493912	0.0961569	0.152532	Genic
105374382	lncRNA	LOC105374382	#N/A	NC_000002.12:28358005-28365766[+]	7762	_	0	0.00563178	0.00454266	Intergenic
105374407	lncRNA	LOC105374407	#N/A	NC_000004.12:37923898-37952812[+]	28915	_	0.109063	0.0321928	0.0530274	Genic
105374464	lncRNA	LOC105374464	#N/A	NC_000002.12:37455822-37613490[+]	157669	_	0.0408714	0.0106975	0.00439843	Intergenic
105374584	lncRNA	LOC105374584	#N/A	NC_000002.12:46642069-46656001[+]	13933	_	0.0893295	0.0450201	0.0742407	Intergenic
105374591	lncRNA	LOC105374591	#N/A	NC_000002.12:47941762-48004926[-]	63165	_	0.268178	0.14034	0.0910255	Intergenic
105374593	lncRNA	LOC105374593	#N/A	NC_000002.12:48108702-48165411[-]	56710	_	0.324933	0.0918237	0.0953987	Intergenic
105374727	lncRNA	LOC105374727	uncharacterized LOC105374727	NC_000005.10:37249046-37250646[+]	1601	_	0.194598	0.0419581	0.176994	Genic
105374746	lncRNA	LOC105374746	#N/A	NC_000005.10:42993494-43000908[+]	7415	_	0.363942	0.300378	0.441568	Intergenic
105374775	lncRNA	LOC105374775	#N/A	NC_000002.12:64644419-64647690[+]	3272	_	0.48035	0.419051	0.369009	Genic
105374808	lncRNA	LOC105374808	#N/A	NC_000002.12:74699035-74710684[+]	11650	_	0.0155344	0.00343675	0.00238961	Intergenic
105374809	lncRNA	LOC105374809	#N/A	NC_000002.12:74928262-74958892[-]	30631	_	0.112607	0.0135641	0.049083	Genic
105374887	lncRNA	LOC105374887	#N/A	NC_000006.12:2940357-2941406[+]	1050	_	0.0737904	0.226064	0.0321147	Intergenic
105374888	lncRNA	LOC105374888	#N/A	NC_000006.12:2989723-2999292[-]	9570	_	0.316183	0.355366	0.265955	Genic
105374906	lncRNA	LOC105374906	#N/A	NC_000006.12:7672641-7700139[+]	27499	_	0.0475731	0.01589	0.0308384	Intergenic
105374947	lncRNA	LOC105374947	#N/A	NC_000006.12:15526366-15560573[+]	34208	_	0.013601	0.0188128	0.0244155	Genic
105374952	lncRNA	LOC105374952	uncharacterized LOC105374952	NC_000006.12:17706130-17711027[+]	4898	_	0.0965199	0.0486357	0.09469	Genic
105374968	lncRNA	LOC105374968	#N/A	NC_000006.12:20597690-20600617[+]	2928	_	0.0715089	0.0553184	0.0802583	Genic
105375130	lncRNA	LOC105375130	#N/A	NC_000007.14:3094030-3118101[-]	24072	_	0.175132	0.0559686	0.0391945	Intergenic
105375236	lncRNA	LOC105375236	#N/A	NC_000007.14:38011608-38044135[+]	32528	_	0.110154	0.0813893	0.226751	Intergenic
105375347	lncRNA	LOC105375347	#N/A	NC_000007.14:70743475-70746136[+]	2662	_	0.0127995	0.0446684	0.0829602	Genic
105375363	lncRNA	LOC105375363	#N/A	NC_000007.14:77653341-77683295[+]	29955	_	0.453152	0.275279	0.375764	Genic
105375378	lncRNA	LOC105375378	#N/A	NC_000007.14:83470863-83482249[-]	11387	_	0.211144	0.103338	0.165166	Genic
105375384	lncRNA	LOC105375384	#N/A	NC_000007.14:87200259-87202754[+]	2496	_	0.0413019	0.0154764	0.00923359	Genic
105375433	lncRNA	LOC105375433	#N/A	NC_000007.14:102407652-102421059[-]	13408	_	0.17358	0.201261	0.184239	Genic
105375434	lncRNA	LOC105375434	#N/A	NC_000007.14:103149660-103214712[+]	65053	_	0.0236996	0.00869718	0.0171055	Genic
105375513	lncRNA	LOC105375513	#N/A	NC_000007.14:134070481-134100731[+]	30251	_	0.0510838	0.0216425	0.0354754	Genic
105375521	lncRNA	LOC105375521	#N/A	NC_000007.14:135687011-135693552[+]	6542	_	0.0638144	0.0715359	0.0339018	Genic
105375523	lncRNA	LOC105375523	#N/A	NC_000007.14:135980901-136439525[+]	458625	_	0.0402692	0.00817507	0.00836886	Intergenic
105375541	lncRNA	LOC105375541	#N/A	NC_000007.14:142813290-142822982[+]	9693	_	0.0106741	0.00490635	0.00562574	Intergenic
105375566	lncRNA	LOC105375566	#N/A	NC_000007.14:150761587-150782904[-]	21318	_	0.0540825	0.0134267	0.0335725	Intergenic
105375591	lncRNA	LOC105375591	#N/A	NC_000007.14:155288609-155297724[-]	9116	_	3.71213	4.05857	4.97824	Intergenic
105375655	lncRNA	LOC105375655	#N/A	NC_000008.11:97148017-97165970[+]	17954	_	0.0435637	0.0133141	0.0240984	Genic
105375674	lncRNA	LOC105375674	#N/A	NC_000008.11:101120210-101127197[-]	6988	_	0.0566841	0.0157314	0.0259242	Intergenic
105375675	lncRNA	LOC105375675	#N/A	NC_000008.11:101128404-101139904[+]	11501	_	0.0690615	0.025414	0.0554034	Genic
105375724	lncRNA	LOC105375724	#N/A	NC_000008.11:118280796-118423563[+]	142768	_	0.0371736	0.0211715	0.00976674	Genic
105375733	lncRNA	LOC105375733	#N/A	NC_000008.11:122338630-122402417[-]	63788	_	0.0617539	0.0329969	0.0528128	Intergenic
105375734	lncRNA	SMILR	smooth muscle induced lncRNA, enhancer of proliferation	NC_000008.11:122414327-122568644[-]	154318	_	2.75586	2.40315	4.1107	Genic
105375754	lncRNA	LOC105375754	#N/A	NC_000008.11:127664539-127670992[-]	6454	_	0.0201411	0.0052701	0.00311675	Intergenic
105375785	lncRNA	LOC105375785	#N/A	NC_000008.11:141194868-141202541[-]	7674	_	0.0111755	0.0074447	0.0329932	Genic
105375840	lncRNA	LOC105375840	#N/A	NC_000008.11:54381693-54395545[+]	13853	_	0.11218	0.0450148	0.050662	Intergenic
105375902	lncRNA	LOC105375902	#N/A	NC_000008.11:73652262-73669031[-]	16770	_	0.162781	0.199395	0.127306	Genic
105375913	lncRNA	LOC105375913	#N/A	NC_000008.11:78938583-78947675[+]	9093	_	0.0238079	0.00335853	0.00680849	Genic
105375914	lncRNA	LOC105375914	#N/A	NC_000008.11:78804578-78937681[+]	133104	_	0.0615613	0.00967463	0.0157627	Genic
105375942	lncRNA	LOC105375942	#N/A	NC_000009.12:128602-134972[-]	6371	_	0.03552	0.0169538	0.020115	Genic
105375943	lncRNA	LOC105375943	#N/A	NC_000009.12:190714-199150[-]	8437	_	0.0753829	0.036337	0.0417349	Intergenic
105375969	lncRNA	LOC105375969	#N/A	NC_000009.12:7179633-7212277[+]	32645	_	0.0341532	0.00350175	0.00312565	Intergenic
105376001	lncRNA	LOC105376001	#N/A	NC_000009.12:27496255-27500418[-]	4164	_	0.0920752	0.0235867	0.0267762	Genic
105376030	lncRNA	LOC105376030	#N/A	NC_000009.12:36779475-36829481[+]	50007	_	0.19787	0.0496102	0.104445	Genic
105376032	lncRNA	LOC105376032	#N/A	NC_000009.12:37002697-37007774[+]	5078	_	0.014941	0.0121628	0.0065017	Genic
105376033	lncRNA	LOC105376033	#N/A	NC_000009.12:37164622-37187005[+]	22384	_	0.470176	0.264944	0.331128	Genic
105376037	lncRNA	LOC105376037	#N/A	NC_000009.12:37789046-37800798[-]	11753	_	0.0314283	0.0366977	0.0434471	Genic
105376059	lncRNA	LOC105376059	#N/A	NC_000009.12:41025597-41036403[+]	10807	_	0.138457	0.0400918	0.0681097	Genic
105376093	lncRNA	LOC105376093	#N/A	NC_000009.12:76515001-76565733[+]	50733	_	0.10285	0.0561137	0.073576	Genic
105376095	lncRNA	LOC105376095	#N/A	NC_000009.12:76606914-76677586[+]	70673	_	0.0349809	0.0128154	0.0180181	Genic
105376103	lncRNA	LOC105376103	#N/A	NC_000009.12:80355312-80451467[+]	96156	_	0.024044	0.00274655	0.00192783	Intergenic
105376244	lncRNA	LOC105376244	#N/A	NC_000009.12:117759459-117872028[+]	112570	_	0.0169784	0.00348863	0.0105835	Genic
105376266	lncRNA	LOC105376266	#N/A	NC_000009.12:123567251-123573588[-]	6338	_	0.126949	0.138804	0.167495	Genic
105376281	lncRNA	LOC105376281	#N/A	NC_000009.12:127536585-127538549[-]	1965	_	0	0.038415	0.028888	Genic
105376364	lncRNA	LOC105376364	#N/A	NC_000010.11:3805430-3808517[+]	3088	_	0	0.0323633	0.00689836	Intergenic
105376447	lncRNA	LOC105376447	#N/A	NC_000010.11:22247420-22254618[-]	7199	_	0.0488265	0.0143734	0.0243624	Intergenic
105376467	lncRNA	LOC105376467	#N/A	NC_000010.11:28325982-28335292[-]	9311	_	0.0622552	0.0427036	0.0371392	Intergenic
105376486	lncRNA	LOC105376486	#N/A	NC_000010.11:32887261-32896306[-]	9046	_	0.132481	0.0733865	0.107396	Intergenic
105376512	lncRNA	LOC105376512	#N/A	NC_000011.10:1298146-1302576[-]	4431	_	0.222965	0.216005	0.338906	Genic
105376577	lncRNA	LOC105376577	#N/A	NC_000011.10:18349238-18350914[+]	1677	_	0.147479	0.0186053	0.0345053	Genic
105376591	lncRNA	LOC105376591	#N/A	NC_000011.10:23141669-23163534[+]	21866	_	0.0073105	0.00512758	0.00212208	Intergenic
105376592	lncRNA	LOC105376592	#N/A	NC_000011.10:23163562-23213332[+]	49771	_	0.00453138	0.00600085	0.00627956	Intergenic
105376647	lncRNA	LOC105376647	#N/A	NC_000011.10:44689359-44701359[-]	12001	_	0.719919	0.443999	0.334608	Intergenic
105376689	lncRNA	LOC105376689	#N/A	NC_000001.11:7693159-7704032[-]	10874	_	0.00923175	0.00359833	0.00509575	Genic
105376748	lncRNA	LOC105376748	#N/A	NC_000002.12:190534525-190574735[+]	40211	_	0.0427055	0.0079821	0.0104205	Genic
105376754	lncRNA	LOC105376754	#N/A	NC_000002.12:192057723-192063829[+]	6107	_	0.0161974	0.00670798	0.0170904	Genic
105376781	lncRNA	LOC105376781	#N/A	NC_000016.10:90133834-90162622[+]	28789	_	2.72635	1.56181	2.52322	Genic
105376805	lncRNA	LOC105376805	uncharacterized LOC105376805	NC_000001.11:16888538-16889666[-]	1129	_	1.53074	0.865427	3.45089	Genic
105376843	lncRNA	SNHG25	small nucleolar RNA host gene 25	NC_000017.11:64145970-64146309[+]	340	_	6.68224	4.01995	6.06494	Genic
105376878	lncRNA	LOC105376878	#N/A	NC_000001.11:24932454-24964709[+]	32256	_	0.0167856	0.0072829	0.00974316	Genic
105376898	lncRNA	LOC105376898	#N/A	NC_000001.11:28867266-28880078[-]	12813	_	0.0795866	0.0303168	0.0387757	Intergenic
105376952	lncRNA	LOC105376952	#N/A	NC_000003.12:11565026-11576352[+]	11327	_	0.0212841	0.00559685	0.0101352	Genic
105376995	lncRNA	LOC105376995	#N/A	NC_000020.11:62533993-62536728[+]	2736	_	0.789606	0.652514	1.42838	Intergenic
105377016	lncRNA	LOC105377016	#N/A	NC_000003.12:30652459-30663487[+]	11029	_	0.412488	0.37406	0.531941	Genic
105377023	lncRNA	LOC105377023	#N/A	NC_000003.12:33783819-33798447[-]	14629	_	0.0272101	0.0116429	0.0213012	Intergenic
105377102	lncRNA	LOC105377102	uncharacterized LOC105377102	NC_000003.12:57269566-57278127[+]	8562	_	0.238488	0.357883	0.584294	Genic
105377148	lncRNA	LOC105377148	#N/A	NC_000003.12:67612315-67620383[-]	8069	_	0.114502	0.085301	0.181916	Genic
105377177	lncRNA	LOC105377177	#N/A	NC_000003.12:80519769-80769829[-]	250061	_	1.27321	0.0429247	0.102134	Genic
105377178	lncRNA	LOC105377178	#N/A	NC_000003.12:81840550-81872955[+]	32406	_	0.138976	0.183218	0.0642825	Intergenic
105377207	lncRNA	LOC105377207	#N/A	NC_000003.12:75282169-75332446[+]	50278	_	0.142986	0.131475	0.164492	Genic
105377276	lncRNA	LOC105377276	#N/A	NC_000004.12:74278045-74330322[-]	52278	_	1.4513	1.0828	2.19145	Genic
105377291	lncRNA	LOC105377291	#N/A	NC_000004.12:76973098-77040878[-]	67781	_	0.109507	0.0639022	0.0461988	Genic
105377319	lncRNA	LOC105377319	#N/A	NC_000004.12:85643505-85660534[+]	17030	_	0.204621	0.0924921	0.177475	Genic
105377320	lncRNA	LOC105377320	#N/A	NC_000004.12:87068937-87075830[+]	6894	_	0.0618203	0.0346066	0.0576885	Genic
105377343	lncRNA	LOC105377343	#N/A	NC_000004.12:98783892-98862894[-]	79003	_	3.19987	2.60673	2.14705	Intergenic
105377348	lncRNA	LOC105377348	uncharacterized LOC105377348	NC_000004.12:102828055-102844106[+]	16052	_	0.0897618	0.0445793	0.0502174	Genic
105377359	lncRNA	LOC105377359	#N/A	NC_000004.12:108668132-108678938[+]	10807	_	0.0252737	0.00427197	0.00861036	Intergenic
105377374	lncRNA	LOC105377374	#N/A	NC_000004.12:113402482-113439055[-]	36574	_	0.00842	0.00605363	0.00744538	Genic
105377384	lncRNA	LOC105377384	#N/A	NC_000004.12:116344096-116355205[+]	11110	_	17.6997	12.9292	29.4759	Intergenic
105377449	lncRNA	LOC105377449	#N/A	NC_000004.12:139404387-139412862[-]	8476	_	0.0528351	0.0177353	0.040999	Intergenic
105377460	lncRNA	LOC105377460	#N/A	NC_000004.12:144081179-144104172[+]	22994	_	0.099012	0.0207962	0.0254616	Intergenic
105377492	lncRNA	LOC105377492	#N/A	NC_000004.12:152283554-152312835[-]	29282	_	0.014927	0.00415303	0.00757545	Intergenic
105377540	lncRNA	LOC105377540	#N/A	NC_000004.12:173363780-173370689[-]	6910	_	0.251689	0.171732	0.0999565	Intergenic
105377548	lncRNA	LOC105377548	#N/A	NC_000004.12:174522844-174536676[+]	13833	_	0.0134363	0.0043469	0.00251985	Genic
105377576	lncRNA	LOC105377576	#N/A	NC_000004.12:182871125-182882876[-]	11752	_	0.0134393	0.00351757	0.00448769	Intergenic
105377621	lncRNA	LOC105377621	uncharacterized LOC105377621	NC_000004.12:102418602-102502486[-]	83885	_	0.943932	1.15886	2.28351	Genic
105377663	lncRNA	LOC105377663	#N/A	NC_000004.12:55890393-55948715[-]	58323	_	0.28615	0.0353099	0.0367279	Genic
105377675	lncRNA	LOC105377675	#N/A	NC_000005.10:157651800-157662589[+]	10790	_	0.0426252	0.023647	0.0300184	Genic
105377771	lncRNA	LOC105377771	#N/A	NC_000005.10:181295401-181321699[+]	26299	_	0.145934	0.016584	0.0647862	Intergenic
105377781	lncRNA	LOC105377781	#N/A	NC_000008.11:2156652-2196528[+]	39877	_	0.0682532	0.0215043	0.0532534	Intergenic
105377782	lncRNA	LOC105377782	#N/A	NC_000008.11:2199670-2206204[+]	6535	_	0.106201	0.0455637	0.191259	Intergenic
105377806	lncRNA	LOC105377806	#N/A	NC_000013.11:113936588-113944427[-]	7840	_	0.0404455	0.0208197	0.0318449	Intergenic
105377809	lncRNA	LOC105377809	#N/A	NC_000013.11:113946084-113954541[-]	8458	_	0.0343014	0.0243826	0.0355277	Intergenic
105377872	lncRNA	LOC105377872	#N/A	NC_000006.12:81692218-81740756[-]	48539	_	0.0975263	0.0370721	0.0851645	Intergenic
105377944	lncRNA	LOC105377944	#N/A	NC_000006.12:111642329-111655889[-]	13561	_	0.0487565	0.0121924	0.0285952	Intergenic
105378046	lncRNA	LOC105378046	#N/A	NC_000006.12:149048530-149053415[+]	4886	_	0.0232239	0.0118592	0.0103919	Genic
105378077	lncRNA	LOC105378077	#N/A	NC_000006.12:157548685-157561455[+]	12771	_	0.0116994	0.00431383	0.00236335	Genic
105378120	lncRNA	LOC105378120	#N/A	NC_000006.12:166968039-166975436[-]	7398	_	0.0637261	0.0130661	0.0303881	Intergenic
105378179	lncRNA	LOC105378179	#N/A	NC_000014.9:49860326-49868000[-]	7675	_	13.6722	12.1156	14.9415	Genic
105378226	lncRNA	LOC105378226	#N/A	NC_000005.10:150353281-150357420[-]	4140	_	0	0.0209888	0.0430901	Intergenic
105378305	lncRNA	LOC105378305	#N/A	NC_000010.11:52556629-52764611[-]	207983	_	2.83855	1.32442	3.27808	Intergenic
105378353	lncRNA	LOC105378353	#N/A	NC_000010.11:71340672-71349452[-]	8781	_	0.11771	0.0818259	0.0300311	Genic
105378367	lncRNA	LOC105378367	uncharacterized LOC105378367	NC_000010.11:75712455-75743848[+]	31394	_	0.179201	0.0584075	0.0935356	Genic
105378378	lncRNA	LOC105378378	#N/A	NC_000010.11:78466613-78473947[+]	7335	_	0.228343	0.119213	0.280506	Genic
105378415	lncRNA	LOC105378415	#N/A	NC_000010.11:88061830-88104391[-]	42562	_	0.0257596	0.00258597	0.014213	Intergenic
105378443	lncRNA	LOC105378443	#N/A	NC_000010.11:96587346-96609705[+]	22360	_	0.00701913	0.0199736	0.010394	Genic
105378449	lncRNA	LOC105378449	#N/A	NC_000010.11:98361306-98368632[+]	7327	_	0.183232	0.0604883	0.177564	Intergenic
105378484	lncRNA	LOC105378484	#N/A	NC_000010.11:111400278-111410607[+]	10330	_	3.91017	4.17895	3.87446	Intergenic
105378485	lncRNA	LOC105378485	#N/A	NC_000010.11:111433931-111482201[+]	48271	_	0.200354	0.116733	0.131231	Intergenic
105378512	lncRNA	LOC105378512	#N/A	NC_000010.11:119595564-119599805[+]	4242	_	0.0208031	0.0298566	0.0526	Genic
105378539	lncRNA	LOC105378539	#N/A	NC_000010.11:124614849-124620743[+]	5895	_	0.00657362	0.00478658	0.00306286	Genic
105378560	lncRNA	LOC105378560	#N/A	NC_000010.11:129708050-129721813[+]	13764	_	0.0172986	0.0078993	0.00647248	Genic
114036	lncRNA	LINC00310	long intergenic non-protein coding RNA 310	NC_000021.9:34180677-34189919[+]	9243	_	0.005537	0	0	Intergenic
105378781	lncRNA	LOC105378781	#N/A	NC_000001.11:67754648-67780748[+]	26101	_	0.428363	0.195853	0.401748	Genic
105378819	lncRNA	LOC105378819	#N/A	NC_000001.11:84574559-84583618[+]	9060	_	0.091468	0.0410181	0.0754011	Intergenic
105378827	lncRNA	LOC105378827	#N/A	NC_000001.11:86502002-86504332[-]	2331	_	0.0959276	0.0328541	0.0336684	Intergenic
105378828	lncRNA	LOC105378828	uncharacterized LOC105378828	NC_000001.11:86571181-86704493[-]	133313	_	0.207577	0.120599	0.15872	Genic
105378833	lncRNA	LOC105378833	#N/A	NC_000001.11:87391195-87430431[+]	39237	_	0.0109254	0.0025281	0.0022841	Intergenic
105378901	lncRNA	LOC105378901	#N/A	NC_000001.11:110748884-110774344[-]	25461	_	0.74498	0.519418	0.51337	Intergenic
105378939	lncRNA	LOC105378939	#N/A	NC_000001.11:120091517-120100797[-]	9281	_	0.0778724	0.0140239	0.0100946	Intergenic
105378948	lncRNA	LOC105378948	#N/A	NC_000001.11:1065635-1068554[-]	2920	_	0.0204025	0.00974822	0.0172191	Genic
105378967	lncRNA	LOC105378967	#N/A	NC_000005.10:54619445-54648062[+]	28618	_	0.0263091	0.00811428	0.0072147	Genic
105378998	lncRNA	LOC105378998	#N/A	NC_000005.10:61902626-62150837[-]	248212	_	0.467171	0.0595431	0.0518948	Intergenic
105379013	lncRNA	LOC105379013	#N/A	NC_000005.10:68429586-68450926[-]	21341	_	0.0132942	0.0046049	0.00355409	Intergenic
105379016	lncRNA	LOC105379016	#N/A	NC_000005.10:71259352-71289857[-]	30506	_	0.0128679	0.0228586	0.0531842	Intergenic
105379042	lncRNA	LOC105379042	#N/A	NC_000005.10:76295231-76312157[-]	16927	_	0.155039	0.12371	0.115629	Genic
105379173	lncRNA	LOC105379173	#N/A	NC_000005.10:131393818-131417962[-]	24145	_	0.133622	0.0702026	0.0765537	Genic
105379250	lncRNA	LOC105379250	#N/A	NC_000009.12:65720099-65723902[+]	3804	_	0.0463303	0.0256024	0.0193482	Genic
105379251	lncRNA	LOC105379251	#N/A	NC_000009.12:65651095-65666135[+]	15041	_	0.0438675	0.0161159	0.0175497	Intergenic
105379283	lncRNA	LOC105379283	#N/A	NC_000001.11:235126919-235128588[-]	1670	_	0.134818	0.117798	0.147876	Genic
105379362	lncRNA	LOC105379362	#N/A	NC_000008.11:32927942-33050053[+]	122112	_	0.0656516	0.0756309	0.0804991	Intergenic
105379392	lncRNA	LOC105379392	#N/A	NC_000008.11:41797746-41801341[+]	3596	_	0.368907	0.277006	0.495936	Genic
105379395	lncRNA	LOC105379395	#N/A	NC_000008.11:42297818-42301357[+]	3540	_	0.0934438	0.0499144	0.076855	Genic
105379413	lncRNA	LOC105379413	#N/A	NC_000024.10:1771051-1782273[+]	11223	_	0.0788685	0.0108975	0.00894595	Intergenic
283860	lncRNA	LINC00304	long intergenic non-protein coding RNA 304	NC_000016.10:89159220-89163675[+]	4456	_	0	0.00279537	0.00754719	Intergenic
105379493	lncRNA	CH507-145C22.1	#N/A	NC_000021.9:6319916-6353819[+]	33904	_	0.0334449	0.00848585	0.0119582	Genic
105379499	lncRNA	LOC105379499	#N/A	NC_000021.9:6984227-6997783[-]	13557	_	0.0365312	0.0383391	0.0585701	Genic
105379749	lncRNA	LOC105379749	#N/A	NC_000007.14:142464030-142541051[-]	77022	_	0.0864945	0.0126768	0.0301535	Genic
105379857	lncRNA	LOC105379857	#N/A	NC_000010.11:43484567-43501981[+]	17415	_	0.0163623	0.00867628	0.00710395	Intergenic
105747689	lncRNA	LOC105747689	uncharacterized LOC105747689	NC_000002.12:191690181-191710469[+]	20289	_	0.12986	0.0400055	0.0996077	Intergenic
339789	lncRNA	LINC00299	long intergenic non-protein coding RNA 299	NC_000002.12:8007771-8328419[-]	320649	_	0.217354	0.112267	0.128811	Intergenic
106736475	lncRNA	PCF11-AS1	PCF11 antisense RNA 1	NC_000011.10:83185521-83187484[-]	1964	_	0.0517004	0.0465642	0.0795309	Genic
107075116	lncRNA	MIR3142HG	MIR3142 host gene	NC_000005.10:160468251-160487426[+]	19176	_	0.178443	0.0843909	0.563914	Genic
107983950	lncRNA	LOC107983950	#N/A	NC_000016.10:88855128-88856581[-]	1454	_	0.0650088	0.0339824	0.0349531	Genic
107983979	lncRNA	LOC107983979	#N/A	NC_000004.12:119412502-119440712[-]	28211	_	0.0754824	0.0275467	0.0861084	Intergenic
107984006	lncRNA	LOC107984006	#N/A	NC_000009.12:40584504-40593812[+]	9309	_	0.0307444	0.0401979	0.025353	Intergenic
107984011	lncRNA	LOC107984011	#N/A	NC_000009.12:70603438-70608272[+]	4835	_	0.111908	0.0344636	0.0888469	Genic
107984036	lncRNA	LOC107984036	#N/A	NC_000004.12:139449745-139453411[-]	3667	_	0.0643551	0.0258484	0.0613139	Genic
107984063	lncRNA	LOC107984063	#N/A	NC_000002.12:64953377-65056217[-]	102841	_	0.044511	0.0296864	0.069448	Genic
107984127	lncRNA	LOC107984127	#N/A	NC_000009.12:125797392-125853596[+]	56205	_	0.412389	0.187059	0.315575	Genic
107984128	lncRNA	LOC107984128	#N/A	NC_000010.11:123951284-123965766[-]	14483	_	0.0128521	0.0117352	0.0308944	Genic
107984129	lncRNA	LOC107984129	#N/A	NC_000012.12:12726103-12739856[+]	13754	_	0.0706065	0.043825	0.0348531	Genic
107984209	lncRNA	LOC107984209	#N/A	NC_000010.11:12473408-12477111[+]	3704	_	0.118835	0.0318778	0.100847	Genic
107984214	lncRNA	LOC107984214	#N/A	NC_000010.11:21726682-21751449[-]	24768	_	0.0112005	0.0186031	0.0108867	Genic
107984251	lncRNA	LOC107984251	#N/A	NC_000010.11:89413856-89421506[-]	7651	_	0.0224849	0.0411817	0.0397691	Genic
107984261	lncRNA	LOC107984261	#N/A	NC_000010.11:99422526-99427324[-]	4799	_	0.0103382	0.0213725	0.0164204	Genic
107984275	lncRNA	LOC107984275	#N/A	NC_000010.11:123185282-123189941[+]	4660	_	0.044605	0.0121628	0.00914043	Intergenic
107984280	lncRNA	LOC107984280	#N/A	NC_000010.11:129780152-129819545[+]	39394	_	0.0125706	0.00429248	0.00520451	Intergenic
107984292	lncRNA	LOC107984292	#N/A	NC_000010.11:60503456-60517134[-]	13679	_	0.062605	0.0209439	0.0493747	Genic
107984293	lncRNA	LOC107984293	#N/A	NC_000010.11:75426099-75431566[-]	5468	_	0.00724788	0.00604537	0.0103863	Intergenic
107984305	lncRNA	LOC107984305	#N/A	NC_000011.10:6606160-6608721[-]	2562	_	0.0468355	0.00925528	0.0194434	Genic
107984315	lncRNA	LOC107984315	#N/A	NC_000011.10:14693792-14704808[+]	11017	_	0.173785	0.215637	0.251828	Genic
107984316	lncRNA	LOC107984316	#N/A	NC_000011.10:17377439-17381661[+]	4223	_	0.0281865	0.0203932	0.0268473	Intergenic
107984334	lncRNA	LOC107984334	#N/A	NC_000011.10:61953924-61959927[-]	6004	_	0.0194779	0.0125628	0.0121623	Genic
107984338	lncRNA	LOC107984338	#N/A	NC_000011.10:65421122-65423380[-]	2259	_	0.0277798	0.0134003	0.0146007	Genic
107984347	lncRNA	LOC107984347	#N/A	NC_000011.10:70361936-70372390[-]	10455	_	0.13233	0.201636	0.181254	Genic
107984374	lncRNA	LOC107984374	#N/A	NC_000011.10:128051583-128054818[-]	3236	_	0.43424	0.0818833	0.235138	Intergenic
107984384	lncRNA	LOC107984384	#N/A	NC_000011.10:109864286-110088592[-]	224307	_	6.61064	6.24546	6.56254	Genic
107984387	lncRNA	LOC107984387	#N/A	NC_000011.10:112366265-112381214[+]	14950	_	0.0257699	0.0105557	0.0155728	Intergenic
107984421	lncRNA	LOC107984421	#N/A	NC_000011.10:72802307-72814344[-]	12038	_	0.0910662	0.0321359	0.0586379	Intergenic
107984438	lncRNA	LOC107984438	#N/A	NC_000012.12:116230533-116234283[-]	3751	_	0.739048	0.780764	0.871934	Genic
107984443	lncRNA	LOC107984443	#N/A	NC_000012.12:122695782-122710104[-]	14323	_	0.0882312	0.0650329	0.222498	Genic
107984485	lncRNA	LOC107984485	#N/A	NC_000012.12:12471785-12484338[+]	12554	_	0.117763	0.0576631	0.0823614	Genic
107984529	lncRNA	LOC107984529	#N/A	NC_000012.12:71658954-71660368[-]	1415	_	0.521621	0.738481	1.40964	Genic
107984537	lncRNA	LOC107984537	#N/A	NC_000012.12:85460957-85469615[-]	8659	_	0.0187393	0.00554628	0.0105171	Genic
107984546	lncRNA	LOC107984546	#N/A	NC_000012.12:96247921-96251857[-]	3937	_	0.0322149	0.0144924	0.0213631	Genic
107984567	lncRNA	LOC107984567	#N/A	NC_000013.11:50713618-50778089[+]	64472	_	0.013185	0.00243232	0.0039857	Genic
339788	lncRNA	LINC00298	long intergenic non-protein coding RNA 298	NC_000002.12:7922425-7976814[-]	54390	_	0.0046755	0.000713567	0.00199048	Intergenic
107984583	lncRNA	LOC107984583	#N/A	NC_000013.11:113213207-113218353[+]	5147	_	0.103751	0.164034	0.275897	Genic
107984634	lncRNA	LOC107984634	#N/A	NC_000014.9:106006659-106011962[+]	5304	_	0.276652	0.159227	0.185762	Genic
107984656	lncRNA	LOC107984656	#N/A	NC_000014.9:56214085-56226085[+]	12001	_	0.235769	0.162128	0.26454	Genic
107984658	lncRNA	LOC107984658	#N/A	NC_000014.9:101764079-101767049[+]	2971	_	0.805246	0.952098	1.54681	Genic
107984718	lncRNA	LOC107984718	#N/A	NC_000015.10:67718873-67723764[+]	4892	_	0.0429967	0.0198284	0.0128543	Genic
107984747	lncRNA	LOC107984747	#N/A	NC_000015.10:91973058-91996069[+]	23012	_	0.250588	0.15439	0.266963	Genic
107984749	lncRNA	LOC107984749	#N/A	NC_000015.10:80896191-80911993[-]	15803	_	0.047442	0.0174107	0.0243334	Genic
107984754	lncRNA	LOC107984754	#N/A	NC_000015.10:64954932-64962604[-]	7673	_	0.140526	0.0878818	0.0609998	Genic
107984755	lncRNA	LOC107984755	#N/A	NC_000015.10:48261743-48320237[-]	58495	_	0.0791287	0.00236163	0.0138978	Genic
107984770	lncRNA	LOC107984770	#N/A	NC_000015.10:25829087-25832973[-]	3887	_	0.059306	0.0886413	0.0531618	Genic
107984781	lncRNA	LOC107984781	#N/A	NC_000015.10:70528591-70550437[-]	21847	_	0	0.005768	0.00671843	Intergenic
107984785	lncRNA	LOC107984785	#N/A	NC_000015.10:22162329-22169784[+]	7456	_	0.0377147	0.0140392	0.0118878	Intergenic
107984806	lncRNA	LOC107984806	#N/A	NC_000016.10:79089563-79102022[+]	12460	_	0.275921	0.328682	0.289188	Genic
107984836	lncRNA	LOC107984836	#N/A	NC_000016.10:29926275-29928699[+]	2425	_	0.393583	0.30475	0.662591	Intergenic
107984852	lncRNA	LOC107984852	#N/A	NC_000016.10:57734338-57736524[-]	2187	_	0.028808	0.0166785	0.014436	Genic
107984865	lncRNA	LOC107984865	#N/A	NC_000016.10:14527489-14531902[-]	4414	_	0.0633025	0.02474	0.0398989	Genic
107984871	lncRNA	LOC107984871	#N/A	NC_000016.10:88934916-88940195[-]	5280	_	0.0143149	0.00808125	0.00395842	Genic
107984889	lncRNA	LOC107984889	#N/A	NC_000016.10:57581237-57599307[+]	18071	_	0.105408	0.0288822	0.0294674	Intergenic
107984916	lncRNA	LOC107984916	#N/A	NC_000001.11:9100305-9102986[-]	2682	_	0.0656181	0.0221589	0.051611	Intergenic
283267	lncRNA	LINC00294	long intergenic non-protein coding RNA 294	NC_000011.10:33076150-33079454[+]	3305	_	0.0915215	0.10583	0.139578	Intergenic
107984945	lncRNA	LOC107984945	#N/A	NC_000001.11:40344672-40364336[+]	19665	_	0.0935849	0.104378	0.0831678	Intergenic
107984948	lncRNA	LOC107984948	#N/A	NC_000001.11:44030437-44040680[+]	10244	_	0.0153796	0.0285035	0.0265924	Genic
107984957	lncRNA	LOC107984957	#N/A	NC_000001.11:53363868-53368363[-]	4496	_	0.0485044	0.0254435	0.0256	Intergenic
107984984	lncRNA	LOC107984984	#N/A	NC_000017.11:63672262-63681131[+]	8870	_	0.158759	0.0802503	0.2482	Genic
107984993	lncRNA	LOC107984993	#N/A	NC_000017.11:57558903-57574828[+]	15926	_	0.0346281	0.0212541	0.0340159	Genic
107984999	lncRNA	LOC107984999	#N/A	NC_000017.11:49613252-49618974[-]	5723	_	0.138042	0.0368438	0.0808285	Genic
107985000	lncRNA	LOC107985000	#N/A	NC_000017.11:64943355-64960013[-]	16659	_	0.0262507	0.0166847	0.0198299	Intergenic
107985002	lncRNA	LOC107985002	#N/A	NC_000017.11:55088622-55097369[+]	8748	_	0.018798	0.00465177	0.00301603	Genic
107985014	lncRNA	LOC107985014	#N/A	NC_000017.11:13776632-13781074[-]	4443	_	0.0107265	0.00496358	0.0068232	Intergenic
107985027	lncRNA	LOC107985027	#N/A	NC_000017.11:46150928-46162470[-]	11543	_	0.333056	0.191832	0.353212	Genic
107985055	lncRNA	LOC107985055	#N/A	NC_000017.11:36116177-36137858[+]	21682	_	0.256952	0.0820486	0.134735	Intergenic
107985073	lncRNA	LOC107985073	#N/A	NC_000017.11:69572642-69582123[-]	9482	_	0.752286	0.335792	0.405601	Intergenic
107985120	lncRNA	LOC107985120	#N/A	NC_000018.10:13494662-13497142[+]	2481	_	0.178344	0.0708257	0.120141	Genic
107985124	lncRNA	LOC107985124	#N/A	NC_000001.11:108064395-108076196[+]	11802	_	0.118783	0.0366426	0.082468	Intergenic
107985137	lncRNA	LOC107985137	#N/A	NC_000018.10:3661815-3685069[+]	23255	_	0.0181625	0.0203363	0.0238515	Genic
107985139	lncRNA	LOC107985139	#N/A	NC_000018.10:35322071-35340667[+]	18597	_	0.0181701	0.0119228	0.0100094	Genic
107985147	lncRNA	LOC107985147	#N/A	NC_000018.10:48766066-48780154[+]	14089	_	0.0114193	0.0054173	0.00829472	Genic
100873962	lncRNA	LINC00278	long intergenic non-protein coding RNA 278	NC_000024.10:3002996-3102272[+]	99277	_	0.0838754	0.00343752	0.0482231	Intergenic
107985188	lncRNA	LOC107985188	#N/A	NC_000018.10:9277615-9278783[+]	1169	_	0.090687	0.0401546	0.0953833	Genic
107985193	lncRNA	LOC107985193	#N/A	NC_000001.11:121337623-121349800[+]	12178	_	0.0717764	0.0396462	0.0663921	Genic
107985211	lncRNA	LOC107985211	#N/A	NC_000001.11:157173625-157189519[+]	15895	_	0.01617	0.00915647	0.00529208	Intergenic
107985224	lncRNA	LOC107985224	#N/A	NC_000001.11:167529547-167535464[-]	5918	_	0.0282504	0.016096	0.0254849	Genic
107985270	lncRNA	LOC107985270	#N/A	NC_000019.10:32206084-32216481[+]	10398	_	6.40289	4.30062	4.35009	Intergenic
107985289	lncRNA	LOC107985289	#N/A	NC_000019.10:40251362-40254327[-]	2966	_	0.0622575	0.103239	0.105931	Genic
107985297	lncRNA	LOC107985297	#N/A	NC_000019.10:4410480-4413716[+]	3237	_	0	0.0243015	0.0348243	Genic
107985360	lncRNA	LOC107985360	#N/A	NC_000001.11:231359111-231369843[+]	10733	_	0.0548605	0.0368108	0.0727817	Genic
107985367	lncRNA	LOC107985367	#N/A	NC_000001.11:236535527-236537884[-]	2358	_	0.0743946	0.0167654	0.0179796	Genic
107985376	lncRNA	LOC107985376	#N/A	NC_000001.11:4603688-4617555[+]	13868	_	1.69075	1.25551	1.24334	Intergenic
107985400	lncRNA	LOC107985400	#N/A	NC_000020.11:25696892-25738240[+]	41349	_	0.0288719	0.00421428	0.00694102	Genic
107985457	lncRNA	LOC107985457	#N/A	NC_000001.11:191965322-191977359[+]	12038	_	0.404197	0.14797	0.124646	Intergenic
107985486	lncRNA	LOC107985486	#N/A	NC_000021.9:29434202-29459965[+]	25764	_	0.129134	0.0373657	0.0449935	Intergenic
107985522	lncRNA	LOC107985522	#N/A	NC_000001.11:120325445-120343591[-]	18147	_	0.146849	0.0775612	0.0942392	Genic
107985558	lncRNA	LOC107985558	#N/A	NC_000022.11:23909456-23926486[-]	17031	_	0.0197884	0.0123661	0.0190083	Intergenic
107985563	lncRNA	LOC107985563	#N/A	NC_000022.11:39066252-39069983[+]	3732	_	0.189861	0.0582494	0.0855426	Intergenic
107985573	lncRNA	LOC107985573	#N/A	NC_000022.11:17198283-17199542[-]	1260	_	0.0761757	0.0374976	0.0166264	Genic
107985595	lncRNA	LOC107985595	#N/A	NC_000001.11:144930264-144934360[-]	4097	_	0.0576013	0.0287754	0.0453503	Genic
107985599	lncRNA	LOC107985599	#N/A	NC_000001.11:246290911-246294672[-]	3762	_	0.184811	0.074767	0.106022	Genic
107985656	lncRNA	LOC107985656	#N/A	NC_000023.11:13665712-13681935[+]	16224	_	0.0924506	0.0522844	0.0781725	Intergenic
107985675	lncRNA	LOC107985675	#N/A	NC_000023.11:7928008-8456431[+]	528424	_	0.0239134	0.0131689	0.0106142	Genic
107985679	lncRNA	LOC107985679	#N/A	NC_000023.11:65598805-65603066[+]	4262	_	0.0409139	0.0256549	0.033083	Genic
107985690	lncRNA	LOC107985690	#N/A	NC_000023.11:79144538-79249964[+]	105427	_	0.248474	0.106371	0.120171	Genic
107985695	lncRNA	LOC107985695	#N/A	NC_000023.11:48617240-48639305[+]	22066	_	0.376193	0.387736	0.26111	Intergenic
107985745	lncRNA	LOC107985745	#N/A	NC_000001.11:169662332-169683582[+]	21251	_	0.870545	0.312231	0.270565	Intergenic
107985780	lncRNA	LOC107985780	#N/A	NC_000002.12:158643677-158657683[+]	14007	_	0.0189034	0.00601782	0.0117249	Genic
107985783	lncRNA	LOC107985783	#N/A	NC_000002.12:185946443-186009895[-]	63453	_	0.0867816	0.0351958	0.0252603	Intergenic
107985819	lncRNA	LOC107985819	#N/A	NC_000002.12:123836874-123913552[-]	76679	_	2.64036	3.16605	2.47324	Genic
107985870	lncRNA	LOC107985870	#N/A	NC_000002.12:37673862-37685979[-]	12118	_	0.0695046	0.0399056	0.0409248	Intergenic
107985885	lncRNA	LOC107985885	#N/A	NC_000002.12:55618220-55625823[+]	7604	_	0.478047	0.163806	86.0508	Intergenic
107985926	lncRNA	LOC107985926	#N/A	NC_000002.12:102031875-102045458[+]	13584	_	0.0349872	0.000562883	0.0226493	Intergenic
107985930	lncRNA	LOC107985930	#N/A	NC_000002.12:106126677-106129667[-]	2991	_	0.0485389	0.0139559	0.0329967	Genic
107985935	lncRNA	LOC107985935	#N/A	NC_000002.12:113208104-113214540[+]	6437	_	0.00815312	0.00589028	0.00323299	Intergenic
107985944	lncRNA	LOC107985944	#N/A	NC_000002.12:127888741-127893850[+]	5110	_	0.0301976	0.00836408	0.00854135	Intergenic
107985949	lncRNA	LOC107985949	#N/A	NC_000002.12:143168409-143173407[+]	4999	_	0.265047	0.0986248	0.205501	Genic
107985972	lncRNA	LOC107985972	#N/A	NC_000002.12:195738136-195759670[+]	21535	_	0.0331591	0.00626398	0.00533407	Genic
107985977	lncRNA	LOC107985977	#N/A	NC_000002.12:210133796-210138826[-]	5031	_	0.0217624	0.00365027	0.00572209	Genic
107986006	lncRNA	LOC107986006	#N/A	NC_000003.12:3127917-3131538[-]	3622	_	0.0230302	0.00693595	0.0100986	Genic
107986015	lncRNA	LOC107986015	#N/A	NC_000003.12:60324531-60331646[-]	7116	_	0.00601937	0.0177972	0.0229042	Genic
107986016	lncRNA	LOC107986016	#N/A	NC_000003.12:61620854-61627800[+]	6947	_	0.00162913	0.007705	0.00362905	Genic
107986019	lncRNA	LOC107986019	#N/A	NC_000003.12:68246618-68318962[+]	72345	_	0.0345945	0.0116914	0.0101323	Genic
107986065	lncRNA	LOC107986065	#N/A	NC_000003.12:16296334-16301262[-]	4929	_	0.0532491	0.0439804	0.0295161	Genic
107986067	lncRNA	LOC107986067	#N/A	NC_000003.12:20186574-20226868[+]	40295	_	0.0212912	0.00367655	0.00702633	Genic
107986069	lncRNA	LOC107986069	#N/A	NC_000003.12:23592457-23597233[+]	4777	_	0.0426186	0.0182486	0.0252782	Intergenic
107986077	lncRNA	LOC107986077	#N/A	NC_000003.12:42012294-42013710[-]	1417	_	0.059765	0.0369156	0.0547606	Intergenic
441123	lncRNA	LINC00266-3	long intergenic non-protein coding RNA 266-3	NC_000006.12:140264-148159[-]	7896	_	0.000790625	0.00021265	0.00472811	Intergenic
107986114	lncRNA	LOC107986114	#N/A	NC_000003.12:113019066-113143936[+]	124871	_	0.050064	0.00923857	0.0240343	Genic
107986119	lncRNA	LOC107986119	#N/A	NC_000003.12:120095700-120100437[+]	4738	_	0.0589684	0.0186295	0.0359215	Genic
107986148	lncRNA	LOC107986148	#N/A	NC_000003.12:156678621-156682273[+]	3653	_	0.191079	0.453343	0.38005	Genic
107986153	lncRNA	LOC107986153	#N/A	NC_000003.12:172181820-172187293[+]	5474	_	0.244929	0.21329	0.548534	Genic
107986168	lncRNA	LOC107986168	#N/A	NC_000003.12:188947380-188957657[+]	10278	_	0.00277313	0.00729922	0.0053302	Genic
107986182	lncRNA	LOC107986182	#N/A	NC_000004.12:13832391-14001617[+]	169227	_	0.015571	0.00407325	0.00850849	Genic
107986184	lncRNA	LOC107986184	#N/A	NC_000004.12:13706872-13730793[-]	23922	_	0.0585392	0.166946	0.15667	Genic
107986187	lncRNA	LOC107986187	#N/A	NC_000004.12:16176684-16179569[-]	2886	_	0.117398	0.0520253	0.0999486	Genic
107986246	lncRNA	LOC107986246	#N/A	NC_000004.12:739427-741416[+]	1990	_	0.0182671	0.0537098	0.0850189	Genic
107986254	lncRNA	LOC107986254	#N/A	NC_000004.12:4522969-4529143[-]	6175	_	0.0499757	0.0662643	0.121828	Genic
107986282	lncRNA	LOC107986282	#N/A	NC_000004.12:56461103-56467551[-]	6449	_	0.0278467	0.00730288	0.00437191	Genic
107986290	lncRNA	LOC107986290	#N/A	NC_000004.12:76996623-76998873[-]	2251	_	0.0875903	0.0481145	0.0734315	Genic
107986294	lncRNA	LOC107986294	#N/A	NC_000004.12:79562155-79625087[+]	62933	_	0.250399	0.229037	0.204011	Genic
107986302	lncRNA	LOC107986302	#N/A	NC_000004.12:109650322-109656352[-]	6031	_	0.0182716	0.0102095	0.014626	Genic
107986317	lncRNA	LOC107986317	#N/A	NC_000004.12:144114774-144190643[+]	75870	_	0.0133149	0.00662742	0.00287181	Genic
107986345	lncRNA	LOC107986345	#N/A	NC_000005.10:21965744-21968485[+]	2742	_	0.033418	0.0104124	0.0201906	Genic
107986348	lncRNA	LOC107986348	#N/A	NC_000005.10:59379888-59392212[-]	12325	_	0.0242558	0.0213696	0.0278045	Genic
107986350	lncRNA	LOC107986350	#N/A	NC_000005.10:59832812-59857870[-]	25059	_	0.00844525	0.00765298	0.0100961	Genic
107986361	lncRNA	LOC107986361	#N/A	NC_000005.10:88789189-88793754[-]	4566	_	0.362565	0.13644	0.177396	Genic
107986363	lncRNA	LOC107986363	#N/A	NC_000005.10:96708700-96720440[+]	11741	_	0.111131	0.0945729	0.163593	Genic
107986364	lncRNA	LOC107986364	#N/A	NC_000005.10:96681771-96689190[+]	7420	_	0.0822351	0.080101	0.146984	Genic
140849	lncRNA	LINC00266-1	long intergenic non-protein coding RNA 266-1	NC_000020.11:64290385-64303354[+]	12970	_	0.0124876	0.0041278	0.00664045	Intergenic
107986412	lncRNA	LOC107986412	#N/A	NC_000005.10:36700879-36725210[-]	24332	_	0.363547	0.247711	0.329198	Intergenic
107986413	lncRNA	LOC107986413	#N/A	NC_000005.10:36665895-36671008[-]	5114	_	0.0210616	0.00536592	0.0130201	Genic
107986422	lncRNA	LOC107986422	#N/A	NC_000005.10:72280850-72292181[-]	11332	_	0.0791922	0.0283605	0.0247667	Genic
107986428	lncRNA	LOC107986428	#N/A	NC_000005.10:80889637-80909927[+]	20291	_	0.0146267	0.0065982	0.00605403	Intergenic
107986437	lncRNA	LOC107986437	#N/A	NC_000005.10:100903408-100944549[+]	41142	_	0.0791088	0.0412633	0.0807152	Intergenic
107986457	lncRNA	LOC107986457	#N/A	NC_000005.10:142961430-142968985[+]	7556	_	0.538986	0.340008	0.950923	Genic
107986461	lncRNA	LOC107986461	#N/A	NC_000005.10:146766252-146770075[-]	3824	_	0.064784	0.0373025	0.0629512	Genic
107986463	lncRNA	LOC107986463	#N/A	NC_000005.10:151168800-151170079[-]	1280	_	0.0938793	0.0406714	0.0856791	Intergenic
107986465	lncRNA	LOC107986465	#N/A	NC_000005.10:154218156-154222433[+]	4278	_	0.0688552	0.038455	0.0695263	Genic
107986476	lncRNA	LOC107986476	#N/A	NC_000005.10:171841115-171851903[-]	10789	_	0.0193055	0.0027491	0.00485444	Intergenic
107986477	lncRNA	LOC107986477	#N/A	NC_000005.10:172113126-172116112[-]	2987	_	0.409731	0.31308	0.614237	Genic
107986485	lncRNA	LOC107986485	#N/A	NC_000005.10:175899049-175911809[-]	12761	_	0.00885787	0.00259817	0.000740761	Intergenic
107986513	lncRNA	LOC107986513	#N/A	NC_000006.12:1695908-1714081[-]	18174	_	0.0421356	0.0140935	0.0228847	Genic
107986515	lncRNA	LOC107986515	#N/A	NC_000006.12:5667480-5674229[+]	6750	_	0.0834328	0.0549965	0.0794091	Genic
107986553	lncRNA	LOC107986553	#N/A	NC_000006.12:278996-285313[-]	6318	_	0.0343558	0.003155	0.00176049	Intergenic
107986640	lncRNA	LOC107986640	#N/A	NC_000006.12:125346200-125363635[+]	17436	_	0.875659	0.439528	0.238234	Intergenic
107986650	lncRNA	LOC107986650	#N/A	NC_000006.12:138890493-138895630[-]	5138	_	0.162509	0.0581372	0.0551425	Genic
107986673	lncRNA	LOC107986673	#N/A	NC_000006.12:167932767-167939728[+]	6962	_	0.0164308	0.0133653	0.0235859	Genic
107986697	lncRNA	LOC107986697	#N/A	NC_000007.14:11202491-11215395[-]	12905	_	0.212491	0.0720746	0.0913795	Intergenic
107986699	lncRNA	LOC107986699	#N/A	NC_000007.14:27600596-27609821[-]	9226	_	0.0689139	0.0206202	0.024327	Genic
107986707	lncRNA	LOC107986707	#N/A	NC_000007.14:66757859-66760474[+]	2616	_	0.15426	0.179367	0.23104	Genic
107986714	lncRNA	LOC107986714	#N/A	NC_000007.14:77378563-77379840[-]	1278	_	0.193043	0.0574456	0.0593863	Genic
107986742	lncRNA	LOC107986742	#N/A	NC_000007.14:74280727-74289314[-]	8588	_	0.149887	0.0951729	0.114405	Intergenic
107986756	lncRNA	LOC107986756	#N/A	NC_000007.14:1459869-1464482[+]	4614	_	0.109932	0.0581119	0.119597	Intergenic
107986785	lncRNA	LOC107986785	#N/A	NC_000007.14:39617764-39623535[-]	5772	_	0.0136694	0.0037839	0.0083325	Genic
107986798	lncRNA	LOC107986798	#N/A	NC_000007.14:55517125-55521065[-]	3941	_	0.10585	0.153641	0.321165	Genic
107986827	lncRNA	CZ1P-ASNS	CZ1P-ASNS readthrough	NC_000007.14:97852117-97972358[-]	120242	_	0.167084	0.0839775	0.165317	Genic
107986828	lncRNA	LOC107986828	#N/A	NC_000007.14:100222695-100232246[+]	9552	_	0.0483309	0.0395098	0.0705192	Genic
107986853	lncRNA	LOC107986853	#N/A	NC_000007.14:139880054-139883833[+]	3780	_	0.576733	0.332989	1.05991	Genic
107986855	lncRNA	LOC107986855	#N/A	NC_000007.14:142461093-142463380[-]	2288	_	0.125404	0.0452826	0.0861283	Genic
107986874	lncRNA	LOC107986874	#N/A	NC_000008.11:120797547-120804227[-]	6681	_	0.142437	0.0806644	0.157467	Genic
107986918	lncRNA	LOC107986918	#N/A	NC_000008.11:17157423-17164847[+]	7425	_	0.0874191	0.0478493	0.0936964	Genic
107986939	lncRNA	LOC107986939	#N/A	NC_000008.11:42139456-42142241[-]	2786	_	0.00296475	0.00908778	0.0154315	Intergenic
107986963	lncRNA	LOC107986963	#N/A	NC_000008.11:101946081-101957281[-]	11201	_	0.0403869	0.0314861	0.0326286	Genic
107986972	lncRNA	LOC107986972	#N/A	NC_000008.11:122485195-122487419[-]	2225	_	13.2637	6.39968	27.0774	Genic
107986974	lncRNA	LOC107986974	#N/A	NC_000008.11:125865530-125871402[-]	5873	_	0.0385602	0.00475833	0.00721851	Intergenic
107986991	lncRNA	LOC107986991	#N/A	NC_000009.12:40091343-40106530[-]	15188	_	0.45308	0.365172	0.399127	Intergenic
107986998	lncRNA	LOC107986998	#N/A	NC_000009.12:41186695-41189098[-]	2404	_	0.020024	0.0161653	0.0108604	Genic
107987003	lncRNA	LOC107987003	#N/A	NC_000009.12:63047994-63053011[-]	5018	_	0.00529325	0.0150789	0.0112172	Intergenic
107987052	lncRNA	LOC107987052	#N/A	NC_000009.12:20581993-20584361[-]	2369	_	0.108603	0.0403059	0.05612	Genic
107987072	lncRNA	LOC107987072	#N/A	NC_000009.12:66269987-66285324[+]	15338	_	0.416986	0.286956	0.421114	Intergenic
107987084	lncRNA	LOC107987084	#N/A	NC_000009.12:80790588-80929227[+]	138640	_	0.0198817	0.00764202	0.00638907	Genic
107987095	lncRNA	LOC107987095	#N/A	NC_000009.12:92670334-92674546[+]	4213	_	0.0381865	0.00700585	0.0107303	Intergenic
107987097	lncRNA	LOC107987097	#N/A	NC_000009.12:93431417-93439282[-]	7866	_	0.0491211	0.0310448	0.0508605	Intergenic
107987112	lncRNA	LOC107987112	#N/A	NC_000009.12:107999931-108020306[+]	20376	_	0.0374344	0.008221	0.00906623	Intergenic
107987118	lncRNA	LOC107987118	#N/A	NC_000009.12:112875883-112883741[+]	7859	_	0.0532952	0.016347	0.0206246	Genic
107987128	lncRNA	LOC107987128	#N/A	NC_000009.12:125647935-125651066[-]	3132	_	0.0707597	0.0120592	0.0184171	Genic
107987136	lncRNA	LOC107987136	#N/A	NC_000009.12:133250401-133253560[-]	3160	_	4.36093	2.69537	4.42715	Intergenic
107987147	lncRNA	LOC107987147	#N/A	NC_000010.11:47529596-47534623[-]	5028	_	0.0981108	0.0620522	0.067954	Genic
107987150	lncRNA	LOC107987150	#N/A	NC_000010.11:87873223-87879202[+]	5980	_	0.607726	0.398122	1.19854	Genic
107987174	lncRNA	LOC107987174	#N/A	NC_000012.12:9603666-9607797[+]	4132	_	0.250775	0.214117	0.127186	Genic
107987182	lncRNA	LOC107987182	#N/A	NC_000012.12:1337352-1339983[+]	2632	_	0.0584324	0.0170493	0.0265835	Genic
107987183	lncRNA	LOC107987183	#N/A	NC_000012.12:11274904-11279984[+]	5081	_	0.0349002	0.0197354	0.019736	Intergenic
107987206	lncRNA	LOC107987206	#N/A	NC_000014.9:49586552-49588254[+]	1703	_	100.666	88.2728	95.6925	Genic
107987219	lncRNA	LOC107987219	#N/A	NC_000015.10:21719706-21727188[+]	7483	_	0.0605306	0.0118209	0.0154819	Intergenic
107987222	lncRNA	LOC107987222	#N/A	NC_000015.10:32518435-32522488[-]	4054	_	2.9973	2.00558	2.94074	Genic
107987245	lncRNA	LOC107987245	#N/A	NC_000017.11:8481582-8486358[+]	4777	_	0.187453	0.165518	0.225935	Genic
107987250	lncRNA	LOC107987250	#N/A	NC_000017.11:81110476-81115788[-]	5313	_	0.0139056	0.00793235	0.0307196	Genic
107987267	lncRNA	LOC107987267	#N/A	NC_000019.10:39940135-39953054[-]	12920	_	0.0227606	0.0287662	0.00788795	Genic
107987272	lncRNA	LOC107987272	#N/A	NC_000019.10:58586267-58590946[+]	4680	_	0.0331734	0.0178332	0.023022	Intergenic
107987292	lncRNA	LOC107987292	#N/A	NC_000021.9:5083817-5086110[-]	2294	_	0.0615521	0.0501412	0.0422983	Intergenic
349114	lncRNA	LINC00265	long intergenic non-protein coding RNA 265	NC_000007.14:39733568-39794623[+]	61056	_	0.0268693	0.0158172	0.0248897	Intergenic
107987303	lncRNA	LOC107987303	#N/A	NC_000021.9:44907987-44910276[-]	2290	_	0.122322	0.0612774	0.109533	Genic
108903150	lncRNA	ZNF8-ERVK3-1	ZNF8-ERVK3-1 readthrough	NC_000019.10:58278966-58315657[+]	36692	_	0.211608	0.163992	0.270337	Genic
109729146	lncRNA	POC1B-AS1	POC1B antisense RNA 1	NC_000012.12:89525570-89541542[+]	15973	_	0.140443	0.0380144	0.0744348	Genic
109729180	lncRNA	SNHG26	small nucleolar RNA host gene 26	NC_000007.14:22854240-22861436[+]	7197	_	0.180966	0.124591	0.262612	Genic
109729181	lncRNA	ZNF710-AS1	ZNF710 antisense RNA 1	NC_000015.10:90074512-90082207[-]	7696	_	0.0917482	0.032688	0.0331021	Genic
110091768	lncRNA	LOC110091768	uncharacterized LOC110091768	NC_000022.11:26860211-26881785[+]	21575	_	0.0399837	0.00926833	0.0149124	Intergenic
110599565	lncRNA	UC.134	long non-coding RNA uc.134	NC_000003.12:158526708-158528574[+]	1867	_	0.044244	0.0155709	0.0113244	Genic
84719	lncRNA	LINC00260	long intergenic non-protein coding RNA 260	NC_000001.11:203730577-203731853[+]	1277	_	0.0673447	0.0284031	0.0649135	Intergenic
111822955	lncRNA	ATRIP-TREX1	ATRIP-TREX1 readthrough	NC_000003.12:48446779-48467645[+]	20867	_	0.102538	0.119036	0.134454	Genic
112267866	lncRNA	LOC112267866	#N/A	NC_000012.12:93412993-93441842[-]	28850	_	0.152789	0.273007	0.306924	Genic
112267872	lncRNA	LOC112267872	#N/A	NC_000019.10:19773659-19816005[+]	42347	_	0.132058	0.0125601	0.0138295	Genic
112267877	lncRNA	LOC112267877	#N/A	NC_000002.12:28722301-28751813[-]	29513	_	0.00784875	0.00724465	0.00676326	Genic
112267905	lncRNA	LOC112267905	#N/A	NC_000015.10:48210840-48230437[-]	19598	_	0.0575541	0.0012321	0.0110616	Genic
112267938	lncRNA	LOC112267938	#N/A	NC_000005.10:20698485-20703533[+]	5049	_	0.0480135	0.00892362	0.0156368	Genic
112267943	lncRNA	LOC112267943	#N/A	NC_000005.10:88207628-88211477[-]	3850	_	0.114105	0.0594307	0.103473	Genic
112267965	lncRNA	LOC112267965	#N/A	NC_000006.12:116267734-116273895[-]	6162	_	0.0572699	0.022954	0.033344	Genic
112267967	lncRNA	LOC112267967	#N/A	NC_000006.12:157311005-157316674[-]	5670	_	0.0902158	0.0506684	0.0634176	Genic
112267973	lncRNA	LOC112267973	#N/A	NC_000006.12:127689086-127702674[-]	13589	_	0.0670636	0.00774582	0.0121898	Intergenic
112268009	lncRNA	LOC112268009	#N/A	NC_000007.14:92632925-92642317[-]	9393	_	0.0592728	0.0276895	0.029053	Genic
112268014	lncRNA	LOC112268014	#N/A	NC_000008.11:8137876-8155935[+]	18060	_	0.0493799	0.00861295	0.0178679	Genic
112268021	lncRNA	LOC112268021	#N/A	NC_000008.11:10482424-10490899[+]	8476	_	0.0289756	0.0045563	0.0105756	Intergenic
112268024	lncRNA	LOC112268024	#N/A	NC_000008.11:30552401-30578047[-]	25647	_	0.099213	0.0301994	0.0535014	Genic
112268030	lncRNA	LOC112268030	#N/A	NC_000008.11:116778974-116789386[+]	10413	_	0.0150591	0.00637723	0.00677869	Intergenic
112268035	lncRNA	LOC112268035	#N/A	NC_000009.12:41398006-41410018[+]	12013	_	0.0668075	0.0229992	0.0366976	Intergenic
112268051	lncRNA	LOC112268051	#N/A	NC_000009.12:97891004-97896538[-]	5535	_	0.0147434	0.0279914	0.0357964	Intergenic
112268063	lncRNA	LOC112268063	#N/A	NC_000010.11:87430124-87492429[+]	62306	_	0.297347	0.170083	0.227597	Intergenic
112268067	lncRNA	LOC112268067	#N/A	NC_000010.11:133011687-133015765[+]	4079	_	0.0209261	0.0130635	0.00941206	Intergenic
112268086	lncRNA	LOC112268086	#N/A	NC_000011.10:86873764-86877751[+]	3988	_	0.0270248	0.00667108	0.0123485	Genic
112268098	lncRNA	LOC112268098	#N/A	NC_000012.12:56312407-56314802[+]	2396	_	0.16516	0.104009	0.0932317	Genic
112268100	lncRNA	LOC112268100	#N/A	NC_000012.12:104643276-104649659[+]	6384	_	0.358456	0.208759	0.373271	Genic
112268133	lncRNA	LOC112268133	#N/A	NC_000014.9:54604047-54614299[+]	10253	_	0.0199345	0.013852	0.0180607	Genic
112268148	lncRNA	LOC112268148	#N/A	NC_000015.10:51914849-51947295[+]	32447	_	0.352312	0.134558	0.274484	Genic
112268177	lncRNA	LOC112268177	#N/A	NC_000016.10:11904379-11915359[-]	10981	_	0.100916	0.190247	0.324496	Genic
112268182	lncRNA	LOC112268182	#N/A	NC_000016.10:88423537-88430362[-]	6826	_	0.079043	0.0163766	0.0180686	Genic
112268195	lncRNA	LOC112268195	#N/A	NC_000017.11:8495218-8497182[+]	1965	_	0.020696	0.0236574	0.0417557	Genic
112268254	lncRNA	LOC112268254	#N/A	NC_000001.11:201991334-201993611[+]	2278	_	0.168346	0.0884618	0.163619	Genic
112268256	lncRNA	LOC112268256	#N/A	NC_000001.11:231268889-231270660[+]	1772	_	0.113959	0.0335734	0.0403587	Genic
112268259	lncRNA	LOC112268259	#N/A	NC_000001.11:247198062-247210871[-]	12810	_	0.195772	0.103435	0.170542	Genic
112268261	lncRNA	LOC112268261	#N/A	NC_000001.11:8905607-8927330[-]	21724	_	0.0708281	0.0208395	0.023056	Intergenic
112268267	lncRNA	LOC112268267	#N/A	NC_000001.11:89117780-89125231[+]	7452	_	0.011951	0.00500938	0.00300748	Genic
112268278	lncRNA	LOC112268278	#N/A	NC_000021.9:44936162-44936938[+]	777	_	0.460716	0.324074	0.394632	Genic
112268292	lncRNA	LOC112268292	#N/A	NC_000022.11:16649058-16653814[+]	4757	_	0.409483	0.206094	0.369515	Genic
112268301	lncRNA	LOC112268301	#N/A	NC_000023.11:135034405-135040358[+]	5954	_	0.0292205	0.0113211	0.0278612	Intergenic
112268420	lncRNA	LOC112268420	#N/A	NC_000002.12:85895203-85904727[+]	9525	_	0.0236687	0.00242605	0.00225955	Intergenic
112268422	lncRNA	LOC112268422	#N/A	NC_000002.12:113482235-113488616[+]	6382	_	0.0550203	0.0203198	0.0255314	Genic
112268438	lncRNA	LOC112268438	#N/A	NC_000002.12:110019989-110031582[+]	11594	_	0.035504	0.0130372	0.0437348	Genic
112268447	lncRNA	LOC112268447	#N/A	NC_000003.12:112595895-112602258[+]	6364	_	0.031596	0.0058428	0.00478632	Genic
112268455	lncRNA	LOC112268455	#N/A	NC_000003.12:99932833-99935278[+]	2446	_	0.0223916	0.015785	0.0190471	Genic
112268458	lncRNA	LOC112268458	#N/A	NC_000003.12:197649303-197654440[-]	5138	_	0.0257782	0.0120894	0.0127543	Intergenic
112268469	lncRNA	LOC112268469	#N/A	NC_000004.12:122076831-122078311[-]	1481	_	0.0193281	0.033909	0.0487935	Intergenic
112268474	lncRNA	LOC112268474	#N/A	NC_000004.12:173393057-173408817[+]	15761	_	0.0598195	0.00637133	0.00946741	Genic
57291	lncRNA	DANCR	differentiation antagonizing non-protein coding RNA	NC_000004.12:52712394-52720697[+]	8304	_	0.533864	0.543387	0.671175	Genic
101928068	lncRNA	LOC101928068	uncharacterized LOC101928068	NC_000001.11:244965204-244970869[-]	5666	_	0.0560095	0.0612894	0.0690466	Genic
105378963	lncRNA	LOC105378963	#N/A	NC_000005.10:52671607-52690083[-]	18477	_	0.03034	0.00707392	0.0356695	Intergenic
51275	lncRNA	MAPKAPK5-AS1	MAPKAPK5 antisense RNA 1	NC_000012.12:111839767-111843005[-]	3239	_	0.308001	0.254785	0.329367	Genic
442075	lncRNA	EMC3-AS1	EMC3 antisense RNA 1	NC_000003.12:9986893-10007004[+]	20112	_	0.11794	0.0884333	0.164202	Genic
100533970	lncRNA	P2RX5-TAX1BP3	P2RX5-TAX1BP3 readthrough (NMD candidate)	NC_000017.11:3662893-3696404[-]	33512	_	0.380647	0.640736	0.419192	Genic
107985262	lncRNA	LOC107985262	#N/A	NC_000001.11:212312925-212319525[+]	6601	_	0.16399	0.0901446	0.18481	Genic
107987192	lncRNA	LOC107987192	#N/A	NC_000013.11:114125287-114126282[-]	996	_	0.230839	0.170463	0.273858	Genic
111216285	lncRNA	LINC02573	long intergenic non-protein coding RNA 2573	NC_000021.9:20256862-20258685[-]	1824	_	0	0	0.000497761	Intergenic
101928429	lncRNA	LOC101928429	uncharacterized LOC101928429	NC_000006.12:136784047-136786054[+]	2008	_	0.340487	0.220461	0.504428	Genic
105374352	lncRNA	LOC105374352	#N/A	NC_000004.12:2342576-2344664[-]	2089	_	0.058835	0.0481297	0.0648441	Genic
107986862	lncRNA	LOC107986862	#N/A	NC_000007.14:151090174-151094493[+]	4320	_	0.0238787	0.0344873	0.0320822	Genic
107987228	lncRNA	LOC107987228	#N/A	NC_000015.10:101490274-101491963[+]	1690	_	0.949724	0.540908	1.20935	Intergenic
100996756	lncRNA	LOC100996756	#N/A	NC_000001.11:146387144-146388091[+]	948	_	0.508806	0.34358	0.617947	Genic
338069	lncRNA	ST7-OT4	ST7 overlapping transcript 4	NC_000007.14:116953848-116959817[+]	5970	_	0.0978944	0.0604203	0.112817	Genic
729614	lncRNA	FLJ37453	uncharacterized LOC729614	NC_000001.11:15834215-15848147[-]	13933	_	0.290011	0.222243	0.360253	Genic
100216545	lncRNA	KMT2E-AS1	KMT2E antisense RNA 1 (head to head)	NC_000007.14:105010542-105014141[-]	3600	_	0.127718	0.161911	0.160601	Genic
100505648	lncRNA	RAD51-AS1	RAD51 antisense RNA 1 (head to head)	NC_000015.10:40693734-40695105[-]	1372	_	0.292049	0.222439	0.355691	Genic
100506866	lncRNA	TTN-AS1	TTN antisense RNA 1	NC_000002.12:178522827-178620217[+]	97391	_	0.397145	0.24244	0.513	Genic
100506897	lncRNA	DAPK1-IT1	DAPK1 intronic transcript 1	NC_000009.12:87553454-87554459[+]	1006	_	0.207399	0.288339	0.26345	Genic
100507533	lncRNA	SOX21-AS1	SOX21 antisense divergent transcript 1	NC_000013.11:94712716-94715945[+]	3230	_	0.0346652	0.0165205	0.0424836	Genic
100996437	lncRNA	LOC100996437	uncharacterized LOC100996437	NC_000007.14:66654519-66669602[+]	15084	_	0.036737	0.0429743	0.0329321	Intergenic
105376707	lncRNA	LOC105376707	#N/A	NC_000015.10:31341619-31348801[+]	7183	_	0.0773669	0.0716495	0.110853	Genic
105377826	lncRNA	LOC105377826	#N/A	NC_000017.11:68098-86410[-]	18313	_	0.180778	0.102953	0.2094	Intergenic
107984329	lncRNA	LOC107984329	#N/A	NC_000011.10:47136149-47144252[-]	8104	_	0.0188121	0.014735	0.0199425	Genic
100526820	lncRNA	CAHM	colon adenocarcinoma hypermethylated (non-protein coding)	NC_000006.12:163413065-163413950[-]	886	_	0.734862	0.789208	0.957388	Genic
105374745	lncRNA	LOC105374745	#N/A	NC_000005.10:42957571-42965057[+]	7487	_	0.0358319	0.00659382	0.0361594	Intergenic
105374771	lncRNA	LOC105374771	#N/A	NC_000002.12:64390956-64455286[-]	64331	_	0.0487863	0.0271327	0.0656768	Genic
23642	lncRNA	SNHG1	small nucleolar RNA host gene 1	NC_000011.10:62851978-62855885[-]	3908	_	2.11303	2.74692	2.92587	Genic
111082993	lncRNA	LINC02569	long intergenic non-protein coding RNA 2569	NC_000006.12:30516266-30519580[+]	3315	_	0.510445	0.455851	0.142339	Intergenic
105377283	lncRNA	LINC02562	long intergenic non-protein coding RNA 2562	NC_000004.12:75081925-75084708[-]	2784	_	0	0.00163797	0	Intergenic
110806285	lncRNA	LINC02561	long intergenic non-protein coding RNA 2561	NC_000010.11:5265989-5271236[-]	5248	_	0.0230281	0.00591755	0.0222707	Intergenic
317648	lncRNA	NOP14-AS1	NOP14 antisense RNA 1	NC_000004.12:2935546-2951078[+]	15533	_	0.0519785	0.0362102	0.0641528	Genic
339192	lncRNA	LOC339192	uncharacterized LOC339192	NC_000017.11:45190931-45221765[-]	30835	_	0.0788461	0.0427575	0.0698482	Genic
399900	lncRNA	LOC399900	#N/A	NC_000011.10:61967798-61969370[+]	1573	_	0.0386893	0.0572651	0.0485262	Intergenic
440993	lncRNA	MIR570HG	MIR570 host gene	NC_000003.12:195688498-195711875[+]	23378	_	0.262611	0.198702	0.321026	Genic
645676	lncRNA	ASH1L-AS1	ASH1L antisense RNA 1	NC_000001.11:155562042-155563944[+]	1903	_	0.157046	0.138559	0.209179	Genic
649446	lncRNA	DLGAP1-AS1	DLGAP1 antisense RNA 1	NC_000018.10:3594114-3597379[+]	3266	_	0.226422	0.160299	0.259503	Genic
724102	lncRNA	SNHG4	small nucleolar RNA host gene 4	NC_000005.10:139273752-139283184[+]	9433	_	0.0466483	0.0591781	0.0640006	Genic
729178	lncRNA	STXBP5-AS1	STXBP5 antisense RNA 1	NC_000006.12:146841388-147204614[-]	363227	_	1.75257	1.64446	2.15885	Genic
729737	lncRNA	LOC729737	uncharacterized LOC729737	NC_000001.11:134773-140566[-]	5794	_	0.324947	0.185029	0.41053	Genic
100049716	lncRNA	LOC100049716	uncharacterized LOC100049716	NC_000012.12:630891-645878[+]	14988	_	0.786585	0.662396	1.01637	Genic
100130418	lncRNA	CECR7	cat eye syndrome chromosome region, candidate 7 (non-protein coding)	NC_000022.11:17036570-17060070[+]	23501	_	0.0153439	0.00786978	0.0178507	Genic
100131943	lncRNA	LOC100131943	#N/A	NC_000017.11:20055284-20057162[+]	1879	_	0.00823488	0.0129564	0.0125593	Genic
100132403	lncRNA	FAM157B	family with sequence similarity 157 member B (non-protein coding)	NC_000009.12:138216856-138272073[+]	55218	_	0.26918	0.122907	0.344954	Genic
102724679	lncRNA	LINC02556	long intergenic non-protein coding RNA 2556	NC_000022.11:23326616-23328493[+]	1878	_	0	0	0.00221642	Intergenic
101930164	lncRNA	LINC02555	#N/A	NC_000012.12:40140926-40159940[-]	19015	_	0.00209038	0.00106102	0.00291223	Intergenic
100505783	lncRNA	OSER1-AS1	OSER1 antisense RNA 1 (head to head)	NC_000020.11:44210960-44226027[+]	15068	_	0.149328	0.145598	0.195187	Genic
100507431	lncRNA	LINC02551	long intergenic non-protein coding RNA 2551	NC_000011.10:130844193-130862110[-]	17918	_	0	0	0.00045233	Intergenic
102724168	lncRNA	LINC02542	long intergenic non-protein coding RNA 2542	NC_000006.12:81843781-82101765[-]	257985	_	0	0.00112237	0	Intergenic
100652772	lncRNA	NNT-AS1	NNT antisense RNA 1	NC_000005.10:43573185-43603230[-]	30046	_	0.297405	0.31902	0.386138	Genic
107986533	lncRNA	LINC02531	#N/A	NC_000006.12:92721394-92725342[-]	3949	_	0	0	0.000405523	Intergenic
100996541	lncRNA	FAM157C	family with sequence similarity 157 member C (non-protein coding)	NC_000016.10:90102264-90177606[+]	75343	_	0.214925	0.10177	0.224289	Genic
105378020	lncRNA	LINC02528	long intergenic non-protein coding RNA 2528	NC_000006.12:137943075-137945800[-]	2726	_	0	0.0106386	0.00508442	Intergenic
101927100	lncRNA	LOC101927100	uncharacterized LOC101927100	NC_000005.10:115602155-115620419[+]	18265	_	0.0942161	0.0450401	0.118961	Genic
101927178	lncRNA	LOC101927178	uncharacterized LOC101927178	NC_000014.9:35081081-35113130[+]	32050	_	0.0184576	0.0330173	0.0339845	Genic
101927550	lncRNA	LOC101927550	uncharacterized LOC101927550	NC_000007.14:99013165-99036492[+]	23328	_	0.131676	0.125075	0.201846	Genic
101927864	lncRNA	LOC101927864	#N/A	NC_000017.11:2366589-2374943[-]	8355	_	0.00875113	0.00386408	0.00855626	Genic
101928464	lncRNA	ZNF433-AS1	ZNF433 and ZNF878 antisense RNA 1	NC_000019.10:11987617-12046275[+]	58659	_	0.904041	0.889077	1.03932	Genic
101928834	lncRNA	LOC101928834	uncharacterized LOC101928834	NC_000010.11:19710335-19728550[-]	18216	_	1.12875	1.38663	1.41294	Genic
101929007	lncRNA	LOC101929007	#N/A	NC_000019.10:21564437-21594959[-]	30523	_	1.00886	1.14667	1.50425	Genic
101929340	lncRNA	LOC101929340	uncharacterized LOC101929340	NC_000011.10:124759134-124765925[+]	6792	_	0.637399	0.776637	0.747674	Genic
101929506	lncRNA	LOC101929506	#N/A	NC_000010.11:79666865-79676003[+]	9139	_	0.0286015	0.0183133	0.0390491	Intergenic
102724670	lncRNA	LOC102724670	#N/A	NC_000008.11:90647715-90687843[+]	40129	_	0.0431607	0.0374428	0.0500727	Intergenic
100505530	lncRNA	LINC02520	long intergenic non-protein coding RNA 2520	NC_000006.12:37507348-37536280[+]	28933	_	0.0103696	0.00172427	0.00179228	Intergenic
102725228	lncRNA	LOC102725228	#N/A	NC_000013.11:112686769-112689898[-]	3130	_	0.0402081	0.0544868	0.0613028	Intergenic
104355295	lncRNA	SGMS1-AS1	SGMS1 antisense RNA 1	NC_000010.11:50624951-50631636[+]	6686	_	0.315991	0.247151	0.425582	Genic
105369317	lncRNA	LOC105369317	#N/A	NC_000011.10:59560068-59565805[-]	5738	_	0.00708537	0.0192822	0.0983535	Genic
105369865	lncRNA	PPP1R12A-AS1	PPP1R12A antisense RNA 1	NC_000012.12:79935281-79941395[+]	6115	_	0.240083	0.123155	0.276914	Genic
105370447	lncRNA	LOC105370447	#N/A	NC_000014.9:34539749-34541706[+]	1958	_	0.549838	0.474545	0.718046	Genic
105370714	lncRNA	LOC105370714	#N/A	NC_000015.10:21266804-21274025[-]	7222	_	0.131602	0.0666133	0.158937	Genic
105370941	lncRNA	LOC105370941	uncharacterized LOC105370941	NC_000015.10:39782906-39785617[+]	2712	_	0.0193557	0.00563452	0.0250314	Intergenic
105371864	lncRNA	LOC105371864	#N/A	NC_000017.11:65078155-65100731[-]	22577	_	0.133698	0.0660849	0.173915	Intergenic
105372274	lncRNA	HSPC102	#N/A	NC_000019.10:11300777-11301535[-]	759	_	0.230873	0.145334	0.276765	Genic
105372452	lncRNA	LOC105372452	#N/A	NC_000019.10:52744586-52754098[+]	9513	_	0.200523	0.198486	0.220646	Intergenic
105372817	lncRNA	LOC105372817	#N/A	NC_000021.9:42879647-42887741[+]	8095	_	0.031579	0.0819507	0.0732087	Genic
105373171	lncRNA	LOC105373171	#N/A	NC_000001.11:232058828-232092497[+]	33670	_	0.0124139	0.00813	0.0141196	Intergenic
105373467	lncRNA	LOC105373467	#N/A	NC_000001.11:144412544-144413918[+]	1375	_	0.0334949	0.0986475	0.0438274	Genic
105374897	lncRNA	LOC105374897	#N/A	NC_000006.12:4902356-4909245[+]	6890	_	0.108355	0.0896986	0.14689	Genic
105377499	lncRNA	LOC105377499	#N/A	NC_000004.12:153713096-153750975[+]	37880	_	0.0240874	0.00958887	0.0263608	Genic
105379005	lncRNA	LOC105379005	#N/A	NC_000005.10:67657584-67701859[-]	44276	_	0.00819813	0.00747135	0.0111035	Genic
107984588	lncRNA	LOC107984588	#N/A	NC_000013.11:102593337-102596891[-]	3555	_	0.0314387	0.0127401	0.0399315	Intergenic
107984659	lncRNA	LOC107984659	#N/A	NC_000014.9:101824197-101838470[+]	14274	_	1.13939	0.876015	1.48824	Genic
107984695	lncRNA	LOC107984695	#N/A	NC_000014.9:71172546-71189072[-]	16527	_	0.0633266	0.0193229	0.0613874	Intergenic
107984748	lncRNA	LOC107984748	#N/A	NC_000015.10:34075987-34079915[-]	3929	_	0.0173075	0.0161819	0.0184099	Intergenic
107985897	lncRNA	LOC107985897	#N/A	NC_000002.12:73004422-73011175[-]	6754	_	0.0568364	0.0241697	0.0712714	Genic
107986055	lncRNA	LOC107986055	#N/A	NC_000003.12:185558320-185562097[-]	3778	_	1.63003	1.59387	2.10303	Intergenic
107986230	lncRNA	LOC107986230	#N/A	NC_000004.12:75448496-75455879[-]	7384	_	0.0412345	0.062951	0.0418283	Intergenic
107987234	lncRNA	LOC107987234	#N/A	NC_000016.10:17465539-17470427[-]	4889	_	0.158765	0.108803	0.217679	Genic
107987330	lncRNA	FAM239C	#N/A	NC_000023.11:3929372-3937685[-]	8314	_	0.0241961	0.0371423	0.0295459	Genic
112267861	lncRNA	LOC112267861	#N/A	NC_000009.12:138268512-138275354[+]	6843	_	0.138731	0.0633657	0.230858	Genic
105370985	lncRNA	LOC105370985	#N/A	NC_000015.10:94583506-94589259[-]	5754	_	0.150118	0.202713	0.156174	Intergenic
101928578	lncRNA	RAP2C-AS1	RAP2C antisense RNA 1	NC_000023.11:132218507-132432811[+]	214305	_	0.0641476	0.0446619	0.0784614	Genic
105369347	lncRNA	LOC105369347	#N/A	NC_000011.10:65662978-65671737[+]	8760	_	0.0264711	0.0206338	0.028298	Intergenic
105372323	lncRNA	LOC105372323	#N/A	NC_000019.10:21586810-21627976[+]	41167	_	0.333998	0.256577	0.391318	Genic
105378041	lncRNA	LOC105378041	#N/A	NC_000006.12:146720752-146730759[-]	10008	_	0.0378751	0.0694678	0.0432653	Genic
107986415	lncRNA	LOC107986415	#N/A	NC_000005.10:55377324-55378208[+]	885	_	0.156502	0.0984119	0.206393	Genic
107986655	lncRNA	LOC107986655	#N/A	NC_000006.12:142946138-142956864[+]	10727	_	0.0156304	0.00862873	0.0178146	Intergenic
107986649	lncRNA	LOC107986649	#N/A	NC_000006.12:137848304-137863962[-]	15659	_	0.0805048	0.0544988	0.10321	Intergenic
9597	lncRNA	SMAD5-AS1	SMAD5 antisense RNA 1	NC_000005.10:136129513-136134890[-]	5378	_	0.00521338	0.0356289	0.00722505	Genic
196475	lncRNA	RMST	rhabdomyosarcoma 2 associated transcript (non-protein coding)	NC_000012.12:97462776-97565015[+]	102240	_	0.00861487	0.00992972	0.00310615	Genic
105377957	lncRNA	LINC02518	long intergenic non-protein coding RNA 2518	NC_000006.12:113428540-113433447[-]	4908	_	0	0	0.000356432	Intergenic
389791	lncRNA	PTGES2-AS1	PTGES2 antisense RNA 1 (head to head)	NC_000009.12:128128529-128130634[+]	2106	_	0.0014935	0.0326592	0.00341584	Genic
102723828	lncRNA	LINC02506	long intergenic non-protein coding RNA 2506	NC_000004.12:31997379-32155406[+]	158028	_	0.0953801	0	0.00254442	Intergenic
100128098	lncRNA	ST8SIA6-AS1	ST8SIA6 antisense RNA 1	NC_000010.11:17386936-17408286[+]	21351	_	0.0929625	0.0216331	0.0566681	Genic
102723525	lncRNA	LINC02498	#N/A	NC_000004.12:10737575-10808910[+]	71336	_	0	0	0.000403193	Intergenic
101055625	lncRNA	OVCH1-AS1	OVCH1 antisense RNA 1	NC_000012.12:29389294-29487324[+]	98031	_	0.0222995	0.0126217	0.00521086	Genic
101927268	lncRNA	LOC101927268	#N/A	NC_000006.12:57855891-57884589[-]	28699	_	0.0290507	0.0058162	0.0011289	Intergenic
101928919	lncRNA	LINC02489	#N/A	NC_000011.10:46256355-46274663[-]	18309	_	0.0618361	0.0591338	0.176162	Intergenic
101927745	lncRNA	LOC101927745	#N/A	NC_000021.9:15370512-15444783[-]	74272	_	0.0085825	0.00872635	0.00341531	Intergenic
101927971	lncRNA	LOC101927971	#N/A	NC_000014.9:68388337-68406693[-]	18357	_	0.000314625	0.00212153	0.000396023	Genic
102723846	lncRNA	LOC102723846	#N/A	NC_000004.12:32225079-32236542[+]	11464	_	0.0821056	0.0185878	0.00122199	Intergenic
105370148	lncRNA	LOC105370148	#N/A	NC_000013.11:31162625-31171800[+]	9176	_	0.00437288	0.0165107	0.00197649	Intergenic
105373098	lncRNA	LOC105373098	#N/A	NC_000022.11:50542303-50544778[-]	2476	_	0	0.0296134	0.0104297	Intergenic
105373960	lncRNA	LOC105373960	#N/A	NC_000002.12:237922300-237934672[-]	12373	_	0.032472	0.018645	0.00566636	Intergenic
105374020	lncRNA	LOC105374020	#N/A	NC_000003.12:104357510-104456674[-]	99165	_	0.00509362	0.00609013	0.000972636	Intergenic
105374760	lncRNA	LOC105374760	#N/A	NC_000002.12:61793493-61798714[+]	5222	_	0	0.0876668	0	Intergenic
105374777	lncRNA	LOC105374777	#N/A	NC_000002.12:64757250-64769166[-]	11917	_	0.0176	0.0123156	0.00502385	Intergenic
105378005	lncRNA	LOC105378005	#N/A	NC_000006.12:131350301-131443798[-]	93498	_	0.018154	0.00490283	0.00183661	Intergenic
105378687	lncRNA	LOC105378687	#N/A	NC_000001.11:43354684-43358630[-]	3947	_	0.0164356	0.014386	0.00930105	Intergenic
105379154	lncRNA	LOC105379154	#N/A	NC_000005.10:122789522-122845319[-]	55798	_	0.0406979	0.0502657	0.0148756	Genic
107984257	lncRNA	LOC107984257	#N/A	NC_000010.11:95142804-95228771[-]	85968	_	0.00760962	0.00460293	0.00122961	Genic
107984703	lncRNA	LOC107984703	uncharacterized LOC107984703	NC_000014.9:95715483-95756779[+]	41297	_	0.00843912	0.0176235	0.00766549	Intergenic
107987294	lncRNA	LOC107987294	#N/A	NC_000021.9:8450700-8454960[+]	4261	_	0.00561188	0.00973155	0.00324803	Intergenic
101180901	lncRNA	IPO11-LRRC70	IPO11-LRRC70 readthrough	NC_000005.10:62578735-62628589[+]	49855	_	1.1255	1.02917	4.15473	Genic
85028	lncRNA	SNHG12	small nucleolar RNA host gene 12	NC_000001.11:28578538-28582983[-]	4446	_	1.60604	1.62657	1.78719	Genic
282997	lncRNA	PDCD4-AS1	PDCD4 antisense RNA 1	NC_000010.11:110868890-110870904[-]	2015	_	0.411077	0.337045	0.420297	Genic
347746	lncRNA	PWARSN	Prader Willi/Angelman region RNA, SNRPN neighbor	NC_000015.10:24981994-24983790[+]	1797	_	0.454867	0.445828	0.487078	Genic
105374366	lncRNA	LINC02482	long intergenic non-protein coding RNA 2482	NC_000004.12:6670728-6673881[-]	3154	_	0.0816175	0.00633345	0.0172242	Intergenic
400604	lncRNA	TOB1-AS1	TOB1 antisense RNA 1	NC_000017.11:50866679-50868371[+]	1693	_	0.0220609	0.0170674	0.0134091	Genic
574406	lncRNA	ADAMTSL4-AS1	ADAMTSL4 antisense RNA 1	NC_000001.11:150560895-150574552[-]	13658	_	0.207774	0.186287	0.276586	Genic
100129858	lncRNA	SCOC-AS1	SCOC antisense RNA 1	NC_000004.12:140283726-140373392[-]	89667	_	0.0123359	0.0144047	0.00860356	Genic
100287467	lncRNA	LOC100287467	uncharacterized LOC100287467	NC_000006.12:116367425-116371719[-]	4295	_	0.0404085	0.0414491	0.044776	Genic
100288846	lncRNA	LOC100288846	uncharacterized LOC100288846	NC_000014.9:39265703-39267061[-]	1359	_	0.0680325	0.0680112	0.12974	Genic
100303728	lncRNA	SLC25A5-AS1	SLC25A5 antisense RNA 1	NC_000023.11:119466033-119469120[-]	3088	_	0.0342984	0.0319262	0.0376868	Genic
339988	lncRNA	LINC002481	long intergenic non-protein coding RNA 2481	NC_000004.12:6687448-6690519[-]	3072	_	0.495941	0.0900198	0.170073	Intergenic
100506365	lncRNA	OTUD6B-AS1	OTUD6B antisense RNA 1 (head to head)	NC_000008.11:91059906-91070189[-]	10284	_	0.946386	0.870779	0.984607	Genic
100507331	lncRNA	ZSWIM8-AS1	ZSWIM8 antisense RNA 1	NC_000010.11:73796514-73801399[-]	4886	_	0.0331818	0.0315466	0.06198	Genic
100507398	lncRNA	INTS6-AS1	INTS6 antisense RNA 1	NC_000013.11:51453345-51454716[+]	1372	_	0.231765	0.215558	0.408528	Genic
100534612	lncRNA	C1QTNF3-AMACR	C1QTNF3-AMACR readthrough (NMD candidate)	NC_000005.10:33986986-34124528[-]	137543	_	0.05382	0.0497793	0.0871712	Genic
105375475	lncRNA	LINC02476	long intergenic non-protein coding RNA 2476	NC_000007.14:119619430-119907375[-]	287946	_	0.002855	0.00710615	0.0164263	Intergenic
101928143	lncRNA	LOC101928143	uncharacterized LOC101928143	NC_000014.9:73460935-73463642[-]	2708	_	0.0455503	0.0424689	0.0782995	Intergenic
101928673	lncRNA	LOC101928673	uncharacterized LOC101928673	NC_000001.11:173417789-173461362[-]	43574	_	0.0243939	0.0184081	0.0111777	Genic
102724397	lncRNA	LOC102724397	#N/A	NC_000018.10:9318622-9334471[-]	15850	_	5.23609	4.07638	4.22663	Intergenic
102724545	lncRNA	LOC102724545	#N/A	NC_000020.11:1890072-1894446[-]	4375	_	0.0255804	0.0527677	0.0898477	Genic
105370774	lncRNA	LOC105370774	#N/A	NC_000015.10:38502415-38515915[+]	13501	_	0.016794	0.015849	0.0308857	Genic
105370792	lncRNA	LOC105370792	uncharacterized LOC105370792	NC_000015.10:41892777-41898815[+]	6039	_	0.0435956	0.0398251	0.0324288	Genic
105371228	lncRNA	LOC105371228	#N/A	NC_000001.11:148009531-148028057[+]	18527	_	0.003551	0.0033254	0.0025747	Genic
105372449	lncRNA	LOC105372449	#N/A	NC_000019.10:52230529-52264461[+]	33933	_	0.0165469	0.0161655	0.0273031	Intergenic
105374748	lncRNA	LOC105374748	#N/A	NC_000005.10:43018632-43034635[+]	16004	_	0.0532561	0.051261	0.0402598	Intergenic
105377730	lncRNA	LOC105377730	#N/A	NC_000005.10:172772400-172783198[+]	10799	_	0.015706	0.0103798	0.00690126	Intergenic
107984366	lncRNA	LOC107984366	#N/A	NC_000011.10:64394342-64396209[-]	1868	_	0.0600501	0.0624391	0.0453151	Intergenic
107984515	lncRNA	LOC107984515	#N/A	NC_000012.12:54984879-55005880[+]	21002	_	0.683865	0.554834	0.555684	Intergenic
107985174	lncRNA	LOC107985174	#N/A	NC_000001.11:110639954-110724740[+]	84787	_	0.205662	0.163103	0.184034	Genic
107987251	lncRNA	LOC107987251	#N/A	NC_000017.11:83100815-83106910[+]	6096	_	0.0163634	0.0160929	0.0335515	Intergenic
100533179	lncRNA	UBE2F-SCLY	UBE2F-SCLY readthrough (NMD candidate)	NC_000002.12:237966945-238099413[+]	132469	_	0.0400486	0.0429051	0.0534835	Genic
107986774	lncRNA	LOC107986774	#N/A	NC_000007.14:19722152-19814347[+]	92196	_	0.0141595	0.0103982	0.00603111	Genic
100506473	lncRNA	LOC100506473	#N/A	NC_000002.12:105331542-105337518[-]	5977	_	0.0273912	0.0263398	0.0304592	Genic
102724701	lncRNA	LOC102724701	#N/A	NC_000021.9:6228966-6670713[-]	441748	_	0.504151	0.481643	1.24487	Genic
105371082	lncRNA	LOC105371082	#N/A	NC_000016.10:11248903-11396487[+]	147585	_	0.030099	0.020006	0.00939514	Genic
107985449	lncRNA	LOC107985449	#N/A	NC_000020.11:22916536-22974194[+]	57659	_	0.118202	0.0902711	0.0757819	Intergenic
107986848	lncRNA	LOC107986848	#N/A	NC_000007.14:129525479-129533838[+]	8360	_	0.0163476	0.0169134	0.00742466	Intergenic
554249	lncRNA	LOC554249	uncharacterized LOC554249	NC_000009.12:39873857-39875395[+]	1539	_	0.0180176	0.0158654	0.0219797	Genic
85009	lncRNA	MGC16025	uncharacterized LOC85009	NC_000002.12:239193331-239195457[-]	2127	_	0.025555	0.0236246	0.037972	Genic
101929447	lncRNA	LOC101929447	#N/A	NC_000010.11:33073724-33116841[-]	43118	_	0.0615756	0.042213	0.0119845	Genic
105375547	lncRNA	LOC105375547	#N/A	NC_000007.14:143495359-143496772[+]	1414	_	3.47962	2.52367	3.00438	Genic
100133319	lncRNA	PRO1804	uncharacterized LOC100133319	NC_000017.11:69232975-69235012[-]	2038	_	0.0126077	0.0146043	0.00591552	Genic
100506746	lncRNA	AFF1-AS1	AFF1 antisense RNA 1	NC_000004.12:86924894-86934850[-]	9957	_	0.165662	0.149344	0.303229	Genic
100652758	lncRNA	LOC100652758	uncharacterized LOC100652758	NC_000005.10:151769793-151772176[-]	2384	_	0.0230715	0.0246404	0.01914	Genic
105373110	lncRNA	LOC105373110	#N/A	NC_000001.11:225447241-225467774[-]	20534	_	0.0310121	0.0219653	0.0260503	Intergenic
105374476	lncRNA	LOC105374476	#N/A	NC_000004.12:9987835-10016736[+]	28902	_	0.00502362	0.00402652	0.0118357	Genic
105376114	lncRNA	LOC105376114	uncharacterized LOC105376114	NC_000009.12:83707835-83713496[+]	5662	_	0.047319	0.0389688	0.116957	Genic
105377785	lncRNA	LOC105377785	#N/A	NC_000008.11:2793733-2841084[+]	47352	_	0.003947	0.00287365	0.00244712	Intergenic
145438	lncRNA	FRMD6-AS1	FRMD6 antisense RNA 1	NC_000014.9:51649516-51651744[-]	2229	_	0.0257584	0.0279303	0.0360086	Genic
11257	lncRNA	TP53TG1	TP53 target 1 (non-protein coding)	NC_000007.14:87325347-87345492[-]	20146	_	0.198702	0.195116	0.336584	Genic
101928794	lncRNA	MAST4-AS1	MAST4 antisense RNA 1	NC_000005.10:67001618-67004154[-]	2537	_	0.466609	0.348774	0.393319	Genic
105374848	lncRNA	LOC105374848	#N/A	NC_000002.12:87319419-87323446[-]	4028	_	0.0139543	0.0110926	0.00932993	Genic
101241892	lncRNA	NPTN-IT1	NPTN intronic transcript 1	NC_000015.10:73566938-73569543[-]	2606	_	0.184341	0.199501	0.333808	Genic
101929705	lncRNA	LOC101929705	uncharacterized LOC101929705	NC_000006.12:43995723-44074652[-]	78930	_	0	0.00799105	0.0588933	Genic
100534589	lncRNA	HOXA10-HOXA9	HOXA10-HOXA9 readthrough	NC_000007.14:27162438-27180261[-]	17824	_	0	0.0131577	0.0491854	Genic
101929540	lncRNA	LOC101929540	#N/A	NC_000010.11:38403166-38435338[+]	32173	_	0.00107863	0.022032	0.0943461	Genic
90246	lncRNA	LOC90246	uncharacterized LOC90246	NC_000003.12:128507835-128510595[+]	2761	_	0.00416813	0.00556587	0.0197202	Intergenic
80054	lncRNA	CEBPA-AS1	CEBPA antisense RNA 1 (head to head)	NC_000019.10:33302821-33305057[+]	2237	_	0.016383	0.00586235	0.00628245	Genic
80072	lncRNA	HEXA-AS1	HEXA antisense RNA 1	NC_000015.10:72376113-72378788[+]	2676	_	0.011877	0.00426893	0.0075045	Genic
85026	lncRNA	ARRDC1-AS1	ARRDC1 antisense RNA 1	NC_000009.12:137615332-137618895[-]	3564	_	0.0137487	0.01216	0.0202803	Genic
91450	lncRNA	LOC91450	uncharacterized LOC91450	NC_000015.10:77993233-77994225[-]	993	_	0.0263816	0.00727905	0.0189881	Genic
93655	lncRNA	ST7-OT3	ST7 overlapping transcript 3	NC_000007.14:117182681-117209937[+]	27257	_	0.00779375	0.0110632	0.0150618	Genic
114044	lncRNA	MCM3AP-AS1	MCM3AP antisense RNA 1	NC_000021.9:46229231-46251701[+]	22471	_	0.027582	0.00106557	0.0106957	Genic
116349	lncRNA	EXOC3-AS1	EXOC3 antisense RNA 1	NC_000005.10:441835-443160[-]	1326	_	0.0235862	0.0103604	0.00908258	Genic
100506159	lncRNA	LINC02470	long intergenic non-protein coding RNA 2470	NC_000012.12:9936579-9943495[-]	6917	_	0.4249	0.85851	0.409565	Intergenic
147276	lncRNA	C18orf15	chromosome 18 open reading frame 15 (putative)	NC_000018.10:13239543-13242076[+]	2534	_	0.0145937	0.00419942	0.00831761	Genic
171391	lncRNA	LOC171391	uncharacterized LOC171391	NC_000011.10:777578-784297[+]	6720	_	0.0643761	0.0119521	0.0151086	Intergenic
728084	lncRNA	LINC02458	long intergenic non-protein coding RNA 2458	NC_000012.12:89011126-89019692[-]	8567	_	0.0367404	0	0.00252011	Intergenic
105369942	lncRNA	LINC02456	#N/A	NC_000012.12:102279574-102463654[+]	184081	_	0	0.0115735	0.0159432	Intergenic
197187	lncRNA	SNAI3-AS1	SNAI3 antisense RNA 1	NC_000016.10:88663373-88687186[+]	23814	_	0.0106032	0.00315848	0.00583744	Genic
200772	lncRNA	LOC200772	uncharacterized LOC200772	NC_000002.12:240954617-240967451[-]	12835	_	0.0443845	0.00399965	0.00571809	Genic
246119	lncRNA	TTTY10	testis-specific transcript, Y-linked 10 (non-protein coding)	NC_000024.10:20465668-20519228[-]	53561	_	0.0313816	0	0.0137676	Genic
246312	lncRNA	C21orf91-OT1	C21orf91 overlapping transcript 1	NC_000021.9:17777404-17792509[-]	15106	_	0.0235349	0.0307972	0.031888	Genic
105369597	lncRNA	LINC02455	#N/A	NC_000012.12:674990-716677[-]	41688	_	0	0	0.0215506	Intergenic
283140	lncRNA	LOC283140	uncharacterized LOC283140	NC_000011.10:112270749-112362534[+]	91786	_	0.0285886	0.00410952	0.00635753	Genic
643770	lncRNA	LINC02453	long intergenic non-protein coding RNA 2453	NC_000012.12:98485544-98503855[-]	18312	_	0.040218	0.028934	0.0346871	Intergenic
283440	lncRNA	ITFG2-AS1	ITFG2 antisense RNA 1	NC_000012.12:2742626-2812924[-]	70299	_	0.0534365	0.00946758	0.030127	Genic
101927905	lncRNA	LINC02449	long intergenic non-protein coding RNA 2449	NC_000012.12:8235415-8242564[+]	7150	_	0	0	0.0040536	Intergenic
730971	lncRNA	LINC02447	long intergenic non-protein coding RNA 2447	NC_000004.12:7097424-7103376[-]	5953	_	0	0	0.00018683	Intergenic
101060038	lncRNA	LINC02446	long intergenic non-protein coding RNA 2446	NC_000012.12:10553379-10575688[+]	22310	_	0.450559	0.24845	0.184681	Intergenic
284889	lncRNA	MIF-AS1	MIF antisense RNA 1	NC_000022.11:23893710-23898930[-]	5221	_	0.00651537	0.00407973	0.00562588	Genic
100507639	lncRNA	LINC02432	long intergenic non-protein coding RNA 2432	NC_000004.12:141321124-141332617[-]	11494	_	0.163587	0.0226139	0.0330659	Intergenic
400236	lncRNA	FOXN3-AS1	FOXN3 antisense RNA 1	NC_000014.9:89417354-89419793[+]	2440	_	0.00619075	0.0231386	0.0335272	Genic
400242	lncRNA	DICER1-AS1	DICER1 antisense RNA 1	NC_000014.9:95157688-95179933[+]	22246	_	0.0691706	0.016416	0.0317893	Genic
401247	lncRNA	LINC00243	long intergenic non-protein coding RNA 243	NC_000006.12:30812866-30830659[-]	17794	_	0.0756504	0.013144	0.0480896	Intergenic
400761	lncRNA	LRRC8C-DT	LRRC8C divergent transcript	NC_000001.11:89624849-89632894[-]	8046	_	0.0321211	0.0201182	0.0601473	Genic
404665	lncRNA	CACTIN-AS1	CACTIN antisense RNA 1	NC_000019.10:3607247-3613930[+]	6684	_	0.0108739	0.0051297	0.0187092	Genic
439931	lncRNA	THAP7-AS1	THAP7 antisense RNA 1	NC_000022.11:21001922-21010374[+]	8453	_	0.0428175	0.00488387	0.00498155	Genic
440714	lncRNA	C1orf143	chromosome 1 open reading frame 143 (putative)	NC_000001.11:218510095-218525978[+]	15884	_	0.0478668	0.00666767	0.0786427	Genic
440934	lncRNA	LOC440934	uncharacterized LOC440934	NC_000002.12:222318471-222357910[+]	39440	_	0.00601063	0.002609	0.0141265	Intergenic
441242	lncRNA	LOC441242	uncharacterized LOC441242	NC_000007.14:65647010-65770810[-]	123801	_	0.0321642	0.00983892	0.0131915	Genic
493900	lncRNA	TMEM9B-AS1	TMEM9B antisense RNA 1	NC_000011.10:8964675-8976283[+]	11609	_	0.0171381	0.0163314	0.0228731	Genic
503538	lncRNA	A1BG-AS1	A1BG antisense RNA 1	NC_000019.10:58351970-58355183[+]	3214	_	0.0263571	0.00170837	0.00655814	Genic
503693	lncRNA	LOH12CR2	loss of heterozygosity, 12, chromosomal region 2 (non-protein coding)	NC_000012.12:12355408-12357067[-]	1660	_	0.00890775	0.00471085	0.0170171	Genic
642946	lncRNA	FLVCR1-AS1	FLVCR1 antisense RNA 1 (head to head)	NC_000001.11:212856604-212858138[-]	1535	_	0.0360425	0.0214713	0.0290856	Genic
105369723	lncRNA	LINC02422	long intergenic non-protein coding RNA 2422	NC_000012.12:31876969-31887203[-]	10235	_	0.128409	0.0456137	0.0390507	Intergenic
644248	lncRNA	SNCA-AS1	SNCA antisense RNA 1	NC_000004.12:89836401-89841991[+]	5591	_	0	0.0036079	0.0270371	Genic
645528	lncRNA	FAM238A	family with sequence similarity 238 member A (non-protein coding)	NC_000010.11:26589865-26594324[+]	4460	_	0.0230289	0.0115051	0.0175915	Genic
653483	lncRNA	AFDN-DT	AFDN divergent transcript	NC_000006.12:167823890-167826796[-]	2907	_	0	0.00308622	0.0162933	Genic
727677	lncRNA	CASC8	cancer susceptibility 8 (non-protein coding)	NC_000008.11:127289676-127482139[-]	192464	_	0.029685	0.0144419	0.0109129	Genic
102724433	lncRNA	LINC02420	long intergenic non-protein coding RNA 2420	NC_000012.12:67440998-67442559[-]	1562	_	0	0.000529183	0	Intergenic
105369906	lncRNA	LINC02413	#N/A	NC_000012.12:92989815-93020580[+]	30766	_	0.0056855	0	0	Intergenic
729296	lncRNA	LOC729296	uncharacterized LOC729296	NC_000020.11:60087686-60101387[+]	13702	_	0.0501986	0.0130716	0.0881177	Intergenic
102724933	lncRNA	LINC02412	long intergenic non-protein coding RNA 2412	NC_000012.12:93174366-93181832[+]	7467	_	0.00184725	0.000237933	0	Intergenic
730198	lncRNA	MEIS1-AS3	MEIS1 antisense RNA 3	NC_000002.12:66423342-66433470[-]	10129	_	0.0117806	0.0041979	0.0161087	Genic
100507616	lncRNA	LINC02397	long intergenic non-protein coding RNA 2397	NC_000012.12:92466679-92483947[+]	17269	_	0.187387	0.0284008	0.0159638	Intergenic
100128988	lncRNA	LOC100128988	uncharacterized LOC100128988	NC_000020.11:40980713-41025396[+]	44684	_	0.0213196	0.00763317	0.00777553	Intergenic
100129215	lncRNA	LOC100129215	#N/A	NC_000016.10:87693537-87696163[-]	2627	_	0.00615775	0.0060396	0.00674919	Genic
100129461	lncRNA	LYRM4-AS1	LYRM4 antisense RNA 1	NC_000006.12:5003816-5240496[+]	236681	_	0.024709	0.00245827	0.00954349	Genic
100130027	lncRNA	LOC100130027	uncharacterized LOC100130027	NC_000008.11:144808810-144827040[-]	18231	_	0.0148769	0.00170523	0.00221401	Genic
101930023	lncRNA	LINC02391	#N/A	NC_000012.12:92257397-92363859[-]	106463	_	0.00882875	0.0003745	0.000197489	Intergenic
100131067	lncRNA	CKMT2-AS1	CKMT2 antisense RNA 1	NC_000005.10:81237565-81301569[-]	64005	_	0.0247999	0.00211827	0.00257966	Genic
100131289	lncRNA	LOC100131289	uncharacterized LOC100131289	NC_000006.12:27761744-27763187[+]	1444	_	0.0211723	0.02377	0.050865	Intergenic
100131655	lncRNA	ZNF236-DT	ZNF236 divergent transcript	NC_000018.10:76794732-76822295[-]	27564	_	0	0	0.0229656	Genic
100131691	lncRNA	MZF1-AS1	MZF1 antisense RNA 1	NC_000019.10:58559186-58574797[+]	15612	_	0	0.0039308	0.00915281	Genic
100131997	lncRNA	FAM27E3	family with sequence similarity 27 member E3	NC_000009.12:67717498-67719179[-]	1682	_	0	0.0070012	0.0157545	Genic
105369652	lncRNA	LINC02390	#N/A	NC_000012.12:9703619-9711454[+]	7836	_	0.0385893	0.0263154	0.0359144	Intergenic
100132686	lncRNA	LOC100132686	uncharacterized LOC100132686	NC_000011.10:112260265-112261396[+]	1132	_	0.0380182	0.00908697	0.0408237	Genic
100133991	lncRNA	MAP3K14-AS1	MAP3K14 antisense RNA 1	NC_000017.11:45247925-45268630[+]	20706	_	0.003004	0.008087	0.0254195	Genic
100134713	lncRNA	NDUFB2-AS1	NDUFB2 antisense RNA 1	NC_000007.14:140695336-140697077[-]	1742	_	0.0226695	0.00680893	0.0184771	Genic
100287015	lncRNA	LOC100287015	uncharacterized LOC100287015	NC_000008.11:6403556-6406548[-]	2993	_	0.007491	0.00488718	0.00499856	Intergenic
100287042	lncRNA	LOC100287042	uncharacterized LOC100287042	NC_000017.11:75271299-75273895[+]	2597	_	0.00441975	0.00230913	0.00826192	Genic
100287216	lncRNA	SH3RF3-AS1	SH3RF3 antisense RNA 1	NC_000002.12:109127327-109130119[-]	2793	_	0.00121075	0.000155833	0.577528	Genic
145200	lncRNA	LINC00239	long intergenic non-protein coding RNA 239	NC_000014.9:101730437-101732525[+]	2089	_	0.0348043	0	0.00035917	Intergenic
100287902	lncRNA	LGALS8-AS1	LGALS8 antisense RNA 1	NC_000001.11:236523069-236524508[-]	1440	_	0.013738	0.0214039	0.0165212	Genic
100289124	lncRNA	FAM27E2	family with sequence similarity 27 member E2	NC_000009.12:41647674-41649440[+]	1767	_	0.00338825	0.00565317	0.00649151	Genic
100302401	lncRNA	RASAL2-AS1	RASAL2 antisense RNA 1	NC_000001.11:178091508-178093993[-]	2486	_	0	0.0031284	0.0159517	Genic
100302522	lncRNA	PTCSC1	papillary thyroid carcinoma susceptibility candidate 1 (non-protein coding)	NC_000008.11:133054959-133057767[+]	2809	_	0.00419112	0.00821953	0.00660211	Genic
100379345	lncRNA	MIR181A2HG	MIR181A2 host gene	NC_000009.12:124658436-124698628[+]	40193	_	0.0698791	0.0104899	0.0179649	Genic
100505692	lncRNA	FTO-IT1	FTO intronic transcript 1	NC_000016.10:54039393-54040373[+]	981	_	0.0198616	0.0106253	0.03077	Genic
100505738	lncRNA	MIR4458HG	MIR4458 host gene	NC_000005.10:8457687-8463096[+]	5410	_	0.00961025	0.00185195	0.00492767	Genic
100505845	lncRNA	ROPN1L-AS1	ROPN1L antisense RNA 1	NC_000005.10:10440735-10441851[-]	1117	_	0.041293	0.01256	0.0310803	Genic
100505921	lncRNA	LOC100505921	uncharacterized LOC100505921	NC_000007.14:7949839-7968752[-]	18914	_	0.0128206	0.0199447	0.0234654	Genic
100505938	lncRNA	LOC100505938	uncharacterized LOC100505938	NC_000007.14:8262225-8343281[+]	81057	_	0.00909088	0	0.018828	Genic
100506054	lncRNA	RNASEH1-AS1	RNASEH1 antisense RNA 1	NC_000002.12:3558386-3561750[+]	3365	_	0.078166	0.00145005	0.0128201	Genic
100506392	lncRNA	SLC16A1-AS1	SLC16A1 antisense RNA 1	NC_000001.11:112956415-112964072[+]	7658	_	0.0243593	0.0118477	0.0112658	Genic
100506472	lncRNA	LOC100506472	uncharacterized LOC100506472	NC_000022.11:39432160-39437128[+]	4969	_	0.013232	0.00279993	0.00449664	Genic
100506606	lncRNA	LOC100506606	uncharacterized LOC100506606	NC_000012.12:29280415-29317848[-]	37434	_	0.0295125	0.00577673	0.00502752	Genic
100506881	lncRNA	MKLN1-AS	MKLN1 antisense RNA	NC_000007.14:131309744-131327779[-]	18036	_	0	0.00159022	0.0111251	Genic
100506939	lncRNA	PRKG1-AS1	PRKG1 antisense RNA 1	NC_000010.11:52296848-52314128[-]	17281	_	0.0146469	0.00698637	0.0139772	Genic
100507250	lncRNA	LOC100507250	uncharacterized LOC100507250	NC_000012.12:68674371-68686859[-]	12489	_	0.0329898	0.00862365	0.00891161	Intergenic
100507433	lncRNA	ZNF571-AS1	ZNF571 antisense RNA 1	NC_000019.10:37548949-37587348[+]	38400	_	0.0227659	0.00419605	0.0080306	Genic
100507459	lncRNA	NRSN2-AS1	NRSN2 antisense RNA 1	NC_000020.11:319687-325252[-]	5566	_	0.0411281	0.00624798	0.0299718	Genic
100507472	lncRNA	LOC100507472	uncharacterized LOC100507472	NC_000015.10:101307251-101309304[-]	2054	_	0.00925413	0.00512638	0.0152042	Genic
100507554	lncRNA	LOC100507554	#N/A	NC_000002.12:216483897-216498849[-]	14953	_	0.008659	0.00547902	0.0227458	Genic
100507557	lncRNA	LOC100507557	uncharacterized LOC100507557	NC_000006.12:145734869-145886585[+]	151717	_	0.0135298	0.00352097	0.00502889	Genic
100507582	lncRNA	BHLHE40-AS1	BHLHE40 antisense RNA 1	NC_000003.12:4896809-4979961[-]	83153	_	0.0105959	0.0059741	0.00620019	Genic
100528007	lncRNA	BORCS7-ASMT	BORCS7-ASMT readthrough (NMD candidate)	NC_000010.11:102854210-102901899[+]	47690	_	0.0114981	0.00309932	0.00877364	Genic
100528022	lncRNA	BLOC1S1-RDH5	BLOC1S1-RDH5 readthrough	NC_000012.12:55716034-55724742[+]	8709	_	0.00892075	0.00692367	0.0256704	Genic
100533182	lncRNA	SEC24B-AS1	SEC24B antisense RNA 1	NC_000004.12:109429963-109433817[-]	3855	_	0.0346696	0.0589032	0.0665752	Genic
100533975	lncRNA	SLMO2-ATP5E	SLMO2-ATP5E readthrough	NC_000020.11:59028678-59042846[-]	14169	_	0.0155015	0.0272016	0.0607947	Genic
100507195	lncRNA	LINC02384	long intergenic non-protein coding RNA 2384	NC_000012.12:68431842-68451484[-]	19643	_	0.253185	0.0847759	0.115182	Intergenic
100652740	lncRNA	PYCARD-AS1	PYCARD antisense RNA 1	NC_000016.10:31201885-31203452[+]	1568	_	0.033408	0.0514495	0.0160191	Genic
100775104	lncRNA	KLHL7-AS1	KLHL7 antisense RNA 1 (head to head)	NC_000007.14:23101228-23105703[-]	4476	_	0.00253625	0.00110197	0.00650938	Genic
105369822	lncRNA	LINC02373	#N/A	NC_000012.12:69449653-69462764[+]	13112	_	0	0	0.00187014	Intergenic
100874235	lncRNA	CACNA1C-AS2	CACNA1C antisense RNA 2	NC_000012.12:2668500-2672220[-]	3721	_	0.063657	0.00954863	0.0224279	Genic
100874264	lncRNA	AOAH-IT1	AOAH intronic transcript 1	NC_000007.14:36597834-36600120[-]	2287	_	0.0913734	0.0188773	0.0278967	Genic
100874372	lncRNA	ARHGAP26-IT1	ARHGAP26 intronic transcript 1	NC_000005.10:143192500-143194166[+]	1667	_	0.078798	0.0106618	0.0453844	Genic
101930452	lncRNA	LINC02367	long intergenic non-protein coding RNA 2367	NC_000012.12:9367464-9397617[+]	30154	_	0	0	0.000539057	Intergenic
100996455	lncRNA	LOC100996455	uncharacterized LOC100996455	NC_000011.10:64449057-64451657[+]	2601	_	0.0335787	0.0051045	0.0110656	Intergenic
100996583	lncRNA	LOC100996583	uncharacterized LOC100996583	NC_000001.11:2566535-2584534[+]	18000	_	0.0249926	0.00919367	0.0322053	Intergenic
101243555	lncRNA	PTENP1-AS	PTENP1 antisense RNA	NC_000009.12:33677268-33688011[+]	10744	_	0.0277951	0.0156918	0.0208803	Genic
101926888	lncRNA	RALY-AS1	RALY antisense RNA 1	NC_000020.11:33992488-33994367[-]	1880	_	0.0363544	0.0169925	0.0184578	Genic
728175	lncRNA	LINC02363	long intergenic non-protein coding RNA 2363	NC_000004.12:184341031-184353977[-]	12947	_	0.00874887	0.00033	0.0044677	Intergenic
101926969	lncRNA	LOC101926969	#N/A	NC_000002.12:91571530-91580863[+]	9334	_	0.014576	0.00545987	0.0102892	Intergenic
101927045	lncRNA	LOC101927045	uncharacterized LOC101927045	NC_000014.9:24442953-24502197[+]	59245	_	0.020315	0.000734	0.00877624	Intergenic
102723766	lncRNA	LINC02362	long intergenic non-protein coding RNA 2362	NC_000004.12:184365561-184382306[-]	16746	_	0	0	0.00412286	Intergenic
101927167	lncRNA	GATA2-AS1	GATA2 antisense RNA 1	NC_000003.12:128489203-128503207[+]	14005	_	0.0121104	0.0062919	0.0182244	Genic
101927202	lncRNA	LOC101927202	#N/A	NC_000022.11:39090690-39093296[+]	2607	_	0.0254799	0.014876	0.0214572	Intergenic
101927369	lncRNA	LOC101927369	#N/A	NC_000017.11:36097886-36150681[-]	52796	_	0.0251328	0.00125605	0.00867351	Genic
101927372	lncRNA	LOC101927372	#N/A	NC_000022.11:42501889-42505859[-]	3971	_	0.0516256	0.00972655	0.00755785	Genic
101927393	lncRNA	LOC101927393	#N/A	NC_000022.11:42871275-42873388[+]	2114	_	0.00628375	0.00135147	0.0111689	Genic
101927439	lncRNA	LOC101927439	#N/A	NC_000003.12:83218094-83273324[+]	55231	_	0	0.00079165	0.0149434	Intergenic
101927522	lncRNA	LOC101927522	#N/A	NC_000019.10:35415908-35434730[-]	18823	_	0.0038695	0.00392943	0.0089266	Genic
101927631	lncRNA	ADNP-AS1	ADNP antisense RNA 1	NC_000020.11:50930984-50945134[+]	14151	_	0.032185	0.00871373	0.0175052	Genic
101927632	lncRNA	LOC101927632	#N/A	NC_000007.14:100435506-100440066[+]	4561	_	0.034703	0.00157087	0.0222655	Genic
101927759	lncRNA	LOC101927759	uncharacterized LOC101927759	NC_000006.12:3024063-3027434[+]	3372	_	0.0156664	0.0289722	0.0545617	Genic
101927863	lncRNA	LOC101927863	#N/A	NC_000016.10:89492403-89504467[-]	12065	_	0.00835375	0.0219879	0.0520512	Intergenic
101927898	lncRNA	LOC101927898	#N/A	NC_000017.11:63682336-63691001[-]	8666	_	0.0146764	0.00360143	0.0195545	Genic
101927979	lncRNA	LOC101927979	#N/A	NC_000017.11:4986991-4990556[+]	3566	_	0.0153933	0.00293983	0.0063237	Genic
101928000	lncRNA	LOC101928000	uncharacterized LOC101928000	NC_000017.11:5111935-5114382[+]	2448	_	0.0490826	0.0326738	0.0319973	Genic
101928037	lncRNA	LOC101928037	#N/A	NC_000008.11:141374183-141382337[+]	8155	_	0.0489004	0.00669895	0.0315929	Intergenic
101928103	lncRNA	LOC101928103	uncharacterized LOC101928103	NC_000002.12:214810229-214963605[+]	153377	_	0.00865287	0.00217943	0.0170286	Genic
100996246	lncRNA	LINC02361	long intergenic non-protein coding RNA 2361	NC_000012.12:132186735-132189695[-]	2961	_	0.0468556	0.00301218	0.00752245	Intergenic
101928307	lncRNA	LOC101928307	uncharacterized LOC101928307	NC_000006.12:68632663-68634324[-]	1662	_	0.0731826	0.0247543	0.068467	Intergenic
101928389	lncRNA	LOC101928389	uncharacterized LOC101928389	NC_000023.11:17528435-17587160[+]	58726	_	0.0348839	0.0247482	0.0129212	Genic
101928415	lncRNA	LOC101928415	#N/A	NC_000023.11:18984190-19082825[+]	98636	_	0.0311494	0.002798	0.00895761	Genic
101928466	lncRNA	LOC101928466	#N/A	NC_000007.14:143611426-143620912[-]	9487	_	0.00257187	0.0008743	0.00454161	Intergenic
101928649	lncRNA	CTC-338M12.4	uncharacterized LOC101928649	NC_000005.10:181246541-181257586[+]	11046	_	0.0702701	0.00199002	0.038488	Genic
101928701	lncRNA	LOC101928701	#N/A	NC_000010.11:16526083-16539768[+]	13686	_	0.0322681	0.00342533	0.00281053	Intergenic
101928846	lncRNA	HIPK1-AS1	HIPK1 antisense RNA 1	NC_000001.11:113924001-113929525[-]	5525	_	0	0.0203425	0.0115306	Genic
101928893	lncRNA	LOC101928893	#N/A	NC_000004.12:78716076-78743807[+]	27732	_	0.0600885	0.00337943	0.00893092	Intergenic
101929128	lncRNA	LOC101929128	uncharacterized LOC101929128	NC_000008.11:9188999-9202858[+]	13860	_	0.058851	0	0.154718	Intergenic
101929185	lncRNA	LOC101929185	#N/A	NC_000017.11:57988110-57994966[+]	6857	_	0.00269337	0.0024131	0.00196533	Genic
101929212	lncRNA	SMIM2-AS1	SMIM2 antisense RNA 1	NC_000013.11:44110549-44154079[+]	43531	_	0.0317185	0.0254144	0.118606	Genic
101929222	lncRNA	DISC1FP1	DISC1 fusion partner 1 (non-protein coding)	NC_000011.10:90251232-90915052[+]	663821	_	0.0101222	0.00643755	0.0237464	Genic
101929279	lncRNA	LOC101929279	uncharacterized LOC101929279	NC_000010.11:30211852-30232690[+]	20839	_	0.0066125	0.00426768	0.00914636	Intergenic
101929295	lncRNA	LOC101929295	uncharacterized LOC101929295	NC_000011.10:95150539-95159148[+]	8610	_	0.00882363	0.00778645	0.00866907	Intergenic
101929351	lncRNA	CDC37L1-AS1	CDC37L1 antisense RNA 1 (head to head)	NC_000009.12:4676600-4679480[-]	2881	_	0.0320841	0.0829296	0.153646	Genic
102725022	lncRNA	LINC02352	long intergenic non-protein coding RNA 2352	NC_000015.10:31216021-31225007[+]	8987	_	0.0165457	0.0055461	0.0285232	Intergenic
64493	lncRNA	LINC00235	long intergenic non-protein coding RNA 235	NC_000016.10:526847-527407[-]	561	_	0	0.000225583	0	Intergenic
101929750	lncRNA	LOC101929750	#N/A	NC_000001.11:221047061-221107863[+]	60803	_	0.011212	0.00085295	0.00801434	Genic
101930100	lncRNA	LOC101930100	#N/A	NC_000021.9:9325024-9367242[+]	42219	_	0.02795	0.0058068	0.00621476	Genic
101930114	lncRNA	LOC101930114	uncharacterized LOC101930114	NC_000001.11:209661359-209742562[-]	81204	_	0	0	0.045527	Genic
101930496	lncRNA	LOC101930496	#N/A	NC_000017.11:83110251-83119423[+]	9173	_	0	0.00268402	0.0101777	Intergenic
102723313	lncRNA	LOC102723313	uncharacterized LOC102723313	NC_000008.11:10729291-10772910[+]	43620	_	0.0146671	0.0093469	0.00857081	Genic
102723340	lncRNA	LOC102723340	#N/A	NC_000012.12:95996392-96011417[+]	15026	_	0.0158677	0.00246597	0.00729993	Genic
102723464	lncRNA	LOC102723464	#N/A	NC_000015.10:65620794-65622795[-]	2002	_	0	0.00361717	0.00770835	Genic
102723566	lncRNA	LOC102723566	uncharacterized LOC102723566	NC_000009.12:127816066-127822520[+]	6455	_	0.0245278	0.00427062	0.0142072	Genic
102723648	lncRNA	LOC102723648	#N/A	NC_000006.12:36146709-36196504[-]	49796	_	0.0279825	0.0235433	0.015266	Intergenic
102723724	lncRNA	LOC102723724	#N/A	NC_000006.12:140807271-140898421[-]	91151	_	0	0.0105972	0.0141559	Intergenic
102723733	lncRNA	LOC102723733	#N/A	NC_000004.12:25860728-25905684[+]	44957	_	0.0107133	0.0011856	0.0120495	Genic
102723761	lncRNA	LOC102723761	#N/A	NC_000001.11:212632369-212665649[-]	33281	_	0.004921	0.0014424	0.00340628	Intergenic
101927505	lncRNA	LINC02348	long intergenic non-protein coding RNA 2348	NC_000015.10:101602786-101614339[-]	11554	_	0	0.00131805	0.00152866	Intergenic
102723784	lncRNA	LOC102723784	#N/A	NC_000001.11:101295213-101309187[-]	13975	_	0.0164976	0.00331553	0.00317406	Intergenic
102723862	lncRNA	LOC102723862	#N/A	NC_000011.10:103842772-103854357[-]	11586	_	0.00741125	0.00267843	0.0048015	Genic
102723878	lncRNA	LOC102723878	#N/A	NC_000011.10:64325050-64340641[-]	15592	_	0.0126254	0	0.0251075	Genic
102724149	lncRNA	LOC102724149	#N/A	NC_000013.11:95300095-95310874[+]	10780	_	0.00780563	0.0239896	0.0200522	Genic
102724150	lncRNA	LOC102724150	#N/A	NC_000023.11:89403129-89455254[+]	52126	_	0.231883	0.00423873	0.0474825	Intergenic
102724262	lncRNA	LOC102724262	#N/A	NC_000017.11:8506775-8513819[+]	7045	_	0	0.0039015	0.0183634	Genic
102724420	lncRNA	LOC102724420	#N/A	NC_000021.9:28377408-28387080[-]	9673	_	0.0138859	0.00121027	0.000326057	Intergenic
102724434	lncRNA	LOC102724434	uncharacterized LOC102724434	NC_000007.14:116275606-116286727[-]	11122	_	0	0	0.0299226	Genic
102724497	lncRNA	LOC102724497	#N/A	NC_000002.12:74711688-74754845[+]	43158	_	0.00833488	0.00212995	0.00393491	Genic
105370154	lncRNA	LINC02344	long intergenic non-protein coding RNA 2344	NC_000013.11:33333846-33335266[-]	1421	_	0	0	0.0020717	Intergenic
102724880	lncRNA	LOC102724880	#N/A	NC_000008.11:9151699-9169478[+]	17780	_	0.00440113	0	0.0142052	Intergenic
102724907	lncRNA	LOC102724907	#N/A	NC_000016.10:50734691-50742869[-]	8179	_	0.00959288	0.0246601	0.0214718	Genic
105370125	lncRNA	LINC02340	#N/A	NC_000013.11:27177668-27220649[-]	42982	_	0.00461025	0.00251927	0	Intergenic
103021294	lncRNA	ABALON	apoptotic BCL2L1-antisense long non-coding RNA	NC_000020.11:31721507-31723409[+]	1903	_	0.0109541	0.00656027	0.00880294	Genic
103344928	lncRNA	KIAA1614-AS1	KIAA1614 antisense RNA 1	NC_000001.11:180949690-180954887[-]	5198	_	0.0218249	0.00775432	0.010362	Genic
103689911	lncRNA	CATIP-AS2	CATIP antisense RNA 2	NC_000002.12:218326241-218357966[-]	31726	_	0.0223217	0.00501347	0.0132836	Genic
101928767	lncRNA	LINC02328	long intergenic non-protein coding RNA 2328	NC_000014.9:85934678-86129778[+]	195101	_	0.0607794	0.0854179	0.0161044	Intergenic
105369147	lncRNA	LOC105369147	uncharacterized LOC105369147	NC_000008.11:103243538-103298818[-]	55281	_	0.0218796	0.00109077	0.00545415	Genic
105369299	lncRNA	LOC105369299	#N/A	NC_000021.9:29296165-29296861[-]	697	_	0.00969163	0.0538416	0.0551819	Intergenic
105369326	lncRNA	LOC105369326	#N/A	NC_000011.10:61003721-61008526[-]	4806	_	0.0109367	0.004845	0.0411178	Genic
105369340	lncRNA	LOC105369340	uncharacterized LOC105369340	NC_000011.10:64245866-64248214[+]	2349	_	0.00731475	0.0251065	0.114006	Genic
105369343	lncRNA	MIR194-2HG	MIR194-2 host gene	NC_000011.10:64888458-64893449[-]	4992	_	0.00272137	0.0033536	0.00716674	Genic
105369383	lncRNA	LOC105369383	#N/A	NC_000011.10:74209208-74212617[+]	3410	_	0.0182612	0.00534577	0.00896145	Genic
105369435	lncRNA	LOC105369435	#N/A	NC_000011.10:94197409-94284831[+]	87423	_	0.00283262	0.00035845	0.00475726	Intergenic
105369487	lncRNA	LOC105369487	#N/A	NC_000011.10:110472528-110498590[+]	26063	_	0.0103199	0.000896783	0.00381001	Intergenic
105369519	lncRNA	LOC105369519	#N/A	NC_000011.10:118691528-118709371[+]	17844	_	0	0.00864418	0.0126222	Intergenic
105369725	lncRNA	LOC105369725	#N/A	NC_000012.12:31958493-31959219[-]	727	_	0.14538	0.0111044	0.0670153	Intergenic
105369760	lncRNA	LOC105369760	#N/A	NC_000012.12:49131600-49148343[+]	16744	_	0.0274153	0.0118427	0.0244005	Intergenic
105369779	lncRNA	LOC105369779	#N/A	NC_000012.12:55729104-55730862[+]	1759	_	0.0247171	0.00508787	0.0173362	Genic
105369820	lncRNA	LOC105369820	#N/A	NC_000012.12:68781698-68793968[+]	12271	_	0.0473473	0.00291892	0.0213162	Intergenic
101929241	lncRNA	LINC02325	long intergenic non-protein coding RNA 2325	NC_000014.9:97458816-97581383[+]	122568	_	0.0552436	0	0.00423045	Intergenic
105369955	lncRNA	LOC105369955	#N/A	NC_000012.12:105426785-105442890[+]	16106	_	0	0	0.0373692	Genic
105370124	lncRNA	LOC105370124	#N/A	NC_000013.11:27046159-27056658[-]	10500	_	0.0099545	0.00767132	0.0112944	Intergenic
105370203	lncRNA	LOC105370203	uncharacterized LOC105370203	NC_000013.11:49235513-49247840[-]	12328	_	0	0.00792973	0.0277648	Intergenic
105370491	lncRNA	LOC105370491	#N/A	NC_000014.9:50837672-50860611[-]	22940	_	0.0135505	0.00202387	0.00984868	Intergenic
105370542	lncRNA	LOC105370542	#N/A	NC_000014.9:67452325-67468717[-]	16393	_	0.0090025	0.0033782	0.00383017	Genic
105370664	lncRNA	LOC105370664	#N/A	NC_000014.9:100405399-100408399[+]	3001	_	0.011462	0.00325277	0.00670589	Genic
100128233	lncRNA	LINC02324	long intergenic non-protein coding RNA 2324	NC_000014.9:65212893-65222347[-]	9455	_	0.0683845	0.0161261	0.151065	Intergenic
105370765	lncRNA	LOC105370765	#N/A	NC_000015.10:35080664-35102014[-]	21351	_	0.00515	0.0004974	0.00167038	Genic
105370767	lncRNA	LOC105370767	#N/A	NC_000015.10:36310255-36361471[-]	51217	_	0.00347587	0.00318017	0.0039123	Intergenic
105370969	lncRNA	LOC105370969	#N/A	NC_000015.10:90839604-90853629[+]	14026	_	0.0179965	0.0193966	0.03187	Intergenic
105371026	lncRNA	LOC105371026	#N/A	NC_000015.10:101039637-101151839[-]	112203	_	0.0071145	0.00182685	0.00236657	Genic
105371168	lncRNA	LOC105371168	#N/A	NC_000016.10:29597788-29603662[+]	5875	_	0.00470613	0.00151933	0.0157876	Genic
105371206	lncRNA	LOC105371206	#N/A	NC_000001.11:144153168-144170705[+]	17538	_	0.0199935	0.00301778	0.0109874	Intergenic
105371216	lncRNA	LOC105371216	#N/A	NC_000001.11:144795679-144813219[-]	17541	_	0.0166245	0.00191975	0.010137	Intergenic
105371223	lncRNA	LOC105371223	#N/A	NC_000001.11:148680046-148688543[+]	8498	_	0	0.00192537	0.016831	Genic
105371254	lncRNA	LOC105371254	#N/A	NC_000001.11:146229076-146237801[+]	8726	_	0.00346563	0.004596	0.0165586	Intergenic
105371267	lncRNA	LOC105371267	p53-regulated lncRNA 1	NC_000016.10:53035690-53052873[-]	17184	_	0.0048095	0.00527828	0.00990676	Genic
105371430	lncRNA	LOC105371430	uncharacterized LOC105371430	NC_000017.11:404535-414023[-]	9489	_	0.15603	0.0240731	0.0644322	Genic
105371433	lncRNA	LOC105371433	uncharacterized LOC105371433	NC_000001.11:150160728-150181228[+]	20501	_	0	0.0293856	0.0364126	Intergenic
105371461	lncRNA	LOC105371461	#N/A	NC_000001.11:159056127-159057750[-]	1624	_	0.174522	0	0.0180344	Intergenic
105371531	lncRNA	LOC105371531	#N/A	NC_000017.11:9243887-9250161[-]	6275	_	0.00809188	0.0050369	0.00473255	Genic
105371716	lncRNA	LOC105371716	#N/A	NC_000017.11:28952660-29016512[+]	63853	_	0.00603463	0.00115167	0.00896195	Genic
105371744	lncRNA	LOC105371744	#N/A	NC_000017.11:35869029-35884725[+]	15697	_	0.028218	0.0233877	0.143629	Genic
105371894	lncRNA	LOC105371894	#N/A	NC_000017.11:74670092-74679914[-]	9823	_	0.0021145	0.00384293	0.00912847	Genic
105371903	lncRNA	LOC105371903	#N/A	NC_000017.11:77457632-77461075[-]	3444	_	0.0168785	0.00141108	0.0149735	Genic
105372097	lncRNA	LOC105372097	#N/A	NC_000018.10:46756948-46795297[+]	38350	_	0.022607	0.0006292	0.00244107	Genic
105372105	lncRNA	LOC105372105	#N/A	NC_000018.10:48832500-48845113[-]	12614	_	0.0061725	0.0021482	0.00427906	Genic
105372266	lncRNA	LOC105372266	#N/A	NC_000019.10:8008390-8015581[+]	7192	_	0.0842996	0.0304206	0.0695863	Intergenic
105372282	lncRNA	LOC105372282	#N/A	NC_000019.10:13104205-13106059[+]	1855	_	0.022315	0.00950518	0.0158615	Genic
105372295	lncRNA	LOC105372295	#N/A	NC_000019.10:16572506-16578892[+]	6387	_	0.00704175	0.0118527	0.0155906	Genic
105372310	lncRNA	LOC105372310	#N/A	NC_000019.10:20125696-20271925[-]	146230	_	0.0131379	0.0012307	0.0066279	Genic
105372321	lncRNA	LOC105372321	#N/A	NC_000019.10:21444104-21464331[-]	20228	_	0.0189525	0.00137253	0.00862806	Intergenic
105372435	lncRNA	LOC105372435	#N/A	NC_000019.10:49808832-49809826[+]	995	_	0.0561493	0.0075052	0.0347081	Genic
105372578	lncRNA	LOC105372578	#N/A	NC_000020.11:24919979-24932985[+]	13007	_	0.0162042	0.00193022	0.0353151	Intergenic
105372681	lncRNA	LOC105372681	#N/A	NC_000020.11:56497538-56499022[+]	1485	_	0.0307257	0.0566181	0.0638741	Genic
105372902	lncRNA	LOC105372902	#N/A	NC_000001.11:211257807-211259292[-]	1486	_	0.0292272	0.00948368	0.0180695	Genic
105373095	lncRNA	LOC105373095	#N/A	NC_000022.11:50205235-50211338[-]	6104	_	0.00506538	0.00221428	0.00410744	Genic
105373383	lncRNA	LOC105373383	uncharacterized LOC105373383	NC_000023.11:153599340-153599893[+]	554	_	0.0732996	0.0119221	0.0389608	Intergenic
105373570	lncRNA	LOC105373570	#N/A	NC_000002.12:113803451-113820826[-]	17376	_	0.0230512	0.00148945	0.00327709	Intergenic
105373713	lncRNA	LOC105373713	#N/A	NC_000002.12:157725716-157728443[-]	2728	_	0.00833212	0.00574557	0.0313304	Intergenic
105373854	lncRNA	LOC105373854	#N/A	NC_000002.12:208064714-208077198[+]	12485	_	0.063864	0.0102425	0.0545965	Intergenic
105374101	lncRNA	LOC105374101	#N/A	NC_000003.12:129184054-129196304[+]	12251	_	0	0.0219829	0.0270518	Intergenic
105374152	lncRNA	LOC105374152	#N/A	NC_000003.12:149952408-149958702[-]	6295	_	0.00384287	0.0030589	0.00227675	Genic
105374167	lncRNA	LOC105374167	#N/A	NC_000003.12:154248468-154251495[-]	3028	_	0.0321269	0.00332268	0.00212923	Genic
105374209	lncRNA	LOC105374209	#N/A	NC_000003.12:170102941-170122038[+]	19098	_	0	0.00655782	0.0121104	Genic
105374254	lncRNA	LOC105374254	#N/A	NC_000003.12:185499142-185504492[+]	5351	_	0.0380876	0.0116786	0.0156436	Intergenic
105374306	lncRNA	LOC105374306	#N/A	NC_000003.12:196496214-196500718[-]	4505	_	0	0.0661796	0.0987036	Genic
105374412	lncRNA	LOC105374412	#N/A	NC_000004.12:38748752-38753474[+]	4723	_	0.0329447	0.00935217	0.0124237	Intergenic
105374538	lncRNA	LOC105374538	#N/A	NC_000004.12:25899142-25914093[-]	14952	_	0.00968	0.00416712	0.00375165	Intergenic
105375036	lncRNA	LOC105375036	#N/A	NC_000006.12:36241390-36248501[-]	7112	_	0	0.0014622	0.00616806	Genic
105375055	lncRNA	LOC105375055	#N/A	NC_000006.12:41221265-41223965[+]	2701	_	0.108175	0.049048	0.0784882	Intergenic
105375114	lncRNA	LOC105375114	#N/A	NC_000007.14:112886-121464[-]	8579	_	0.00142837	0.000718867	0.00262328	Intergenic
105375127	lncRNA	LOC105375127	#N/A	NC_000007.14:2110670-2117740[+]	7071	_	0.0331307	0.00410683	0.00444994	Genic
105375153	lncRNA	LOC105375153	#N/A	NC_000007.14:11248382-11385952[+]	137571	_	0.003984	0.00118312	0.00164464	Genic
105375213	lncRNA	LOC105375213	#N/A	NC_000007.14:29639695-29645177[-]	5483	_	0.001332	0.0023843	0.00416347	Intergenic
105375465	lncRNA	LOC105375465	#N/A	NC_000007.14:116940339-116947860[+]	7522	_	0.0532241	0.0203202	0.0398061	Intergenic
101927729	lncRNA	LINC02322	long intergenic non-protein coding RNA 2322	NC_000014.9:60323196-60323907[+]	712	_	0	0.00114282	0	Intergenic
105375492	lncRNA	LOC105375492	#N/A	NC_000007.14:127938201-128007844[-]	69644	_	0.00155737	0.00158857	0.00703352	Genic
105375624	lncRNA	LOC105375624	#N/A	NC_000008.11:86333274-86344656[-]	11383	_	0.0104345	0.00286902	0.00457559	Genic
105375666	lncRNA	LOC105375666	#N/A	NC_000008.11:98996760-99013031[-]	16272	_	0.0358022	0.0256256	0.062109	Genic
105375741	lncRNA	LOC105375741	#N/A	NC_000008.11:124728535-124758242[+]	29708	_	0.011208	0.00385597	0.00446711	Intergenic
105375743	lncRNA	LOC105375743	#N/A	NC_000008.11:124832233-124857485[-]	25253	_	0.0163166	0.00407965	0.0158806	Intergenic
105376014	lncRNA	LOC105376014	#N/A	NC_000009.12:32450235-32454362[-]	4128	_	0.0444395	0.00464388	0.00393673	Genic
105376026	lncRNA	LOC105376026	#N/A	NC_000009.12:35491136-35492798[-]	1663	_	0.0432585	0.00366292	0.0200352	Genic
105376279	lncRNA	LOC105376279	#N/A	NC_000009.12:127021756-127023250[+]	1495	_	0.0237265	0.0026475	0.0134219	Genic
105376311	lncRNA	LOC105376311	#N/A	NC_000009.12:134472610-134483232[+]	10623	_	0	0.0049294	0.012518	Intergenic
105376384	lncRNA	LOC105376384	#N/A	NC_000010.11:5935070-5945942[-]	10873	_	0	0.000984417	0.0084862	Genic
105376463	lncRNA	LOC105376463	#N/A	NC_000010.11:27542835-27584001[+]	41167	_	0.0177845	0.00482222	0.00633898	Intergenic
105376544	lncRNA	LOC105376544	#N/A	NC_000011.10:10301745-10304987[-]	3243	_	0.00815287	0.00190855	0.0174675	Genic
105376579	lncRNA	LOC105376579	#N/A	NC_000011.10:18706322-18719102[+]	12781	_	0.0291506	0.00350693	0.0132109	Genic
105376704	lncRNA	LOC105376704	#N/A	NC_000015.10:30427809-30470786[-]	42978	_	0.02284	0.0400609	0.0422144	Genic
105376710	lncRNA	LOC105376710	#N/A	NC_000015.10:32469195-32473444[-]	4250	_	0	0.0296128	0.0683125	Intergenic
105376834	lncRNA	LOC105376834	#N/A	NC_000001.11:21585690-21591187[+]	5498	_	0.008746	0.00473835	0.0356453	Intergenic
105376892	lncRNA	LOC105376892	#N/A	NC_000001.11:27519923-27530506[+]	10584	_	0	0.00345217	0.0041955	Intergenic
105370623	lncRNA	LINC02321	#N/A	NC_000014.9:90819440-90828175[-]	8736	_	0	0	0.000968125	Intergenic
105377015	lncRNA	LOC105377015	#N/A	NC_000003.12:30603886-30606377[-]	2492	_	0.00636537	0.00699718	0.0103178	Intergenic
105370676	lncRNA	LINC02320	#N/A	NC_000014.9:101632321-101731343[-]	99023	_	0	0.000362433	0.0090682	Intergenic
105377199	lncRNA	LOC105377199	#N/A	NC_000022.11:36388055-36411040[+]	22986	_	0.0277448	0.00957845	0.013007	Genic
105377224	lncRNA	LOC105377224	#N/A	NC_000024.10:19744788-19759994[+]	15207	_	0.01125	0.000537933	0.00338884	Genic
105377267	lncRNA	LOC105377267	uncharacterized LOC105377267	NC_000004.12:69182100-69216767[+]	34668	_	0.00917638	0	0.0032357	Genic
105377294	lncRNA	LOC105377294	#N/A	NC_000004.12:76906667-76949655[-]	42989	_	0.0138018	0.00151335	0.00873499	Genic
105377402	lncRNA	LOC105377402	#N/A	NC_000004.12:121641627-121650671[-]	9045	_	0.00957225	0.00882913	0.0329022	Intergenic
105377445	lncRNA	LOC105377445	#N/A	NC_000004.12:137751401-137757644[+]	6244	_	0.0038065	0	0.0120531	Intergenic
105377498	lncRNA	LOC105377498	#N/A	NC_000004.12:153527495-153542246[-]	14752	_	0.00159475	0.00209725	0.0163324	Genic
105377587	lncRNA	LOC105377587	#N/A	NC_000004.12:184826607-184844468[+]	17862	_	0	0.0117244	0.0374395	Genic
105377623	lncRNA	LOC105377623	uncharacterized LOC105377623	NC_000004.12:143177660-143184861[-]	7202	_	0.0730066	0.00325397	0.00997226	Intergenic
105377632	lncRNA	LOC105377632	#N/A	NC_000002.12:57288017-57712960[-]	424944	_	0.0121711	0.000910233	0.00223693	Genic
105377725	lncRNA	LOC105377725	#N/A	NC_000005.10:171795269-171835431[-]	40163	_	0.0102494	0.00180633	0.00411944	Intergenic
105377762	lncRNA	LOC105377762	#N/A	NC_000005.10:179532877-179550506[-]	17630	_	0.0161681	0.00905073	0.0115765	Intergenic
105377871	lncRNA	LOC105377871	#N/A	NC_000006.12:81444789-81550244[-]	105456	_	0.0106769	0.00288918	0.00875692	Intergenic
105377884	lncRNA	LOC105377884	#N/A	NC_000006.12:88277595-88299623[-]	22029	_	0.00451837	0.001562	0.00805307	Intergenic
105377896	lncRNA	LOC105377896	#N/A	NC_000006.12:92584904-92596332[-]	11429	_	0.002146	0.00155978	0.00139355	Intergenic
105377936	lncRNA	LOC105377936	#N/A	NC_000006.12:110415700-110420130[+]	4431	_	0.00468763	0.0157238	0.0601637	Intergenic
105378085	lncRNA	LOC105378085	#N/A	NC_000006.12:159586907-159604657[-]	17751	_	0.007995	0.0058486	0.00564719	Intergenic
105378100	lncRNA	LOC105378100	#N/A	NC_000006.12:163387343-163393403[-]	6061	_	0.0276051	0.00116602	0.000847966	Intergenic
105378122	lncRNA	LOC105378122	#N/A	NC_000006.12:167112033-167122602[-]	10570	_	0.0079905	0.00155092	0.00100801	Genic
105378225	lncRNA	LOC105378225	#N/A	NC_000005.10:150334882-150340655[-]	5774	_	0	0.0370346	0.0469955	Intergenic
105378571	lncRNA	LOC105378571	#N/A	NC_000010.11:132847330-132857537[+]	10208	_	0.00601988	0.0008252	0.00422675	Genic
105370498	lncRNA	LINC02319	#N/A	NC_000014.9:52110532-52125497[-]	14966	_	0.0144753	0.00593463	0.00160935	Intergenic
105378645	lncRNA	LOC105378645	#N/A	NC_000001.11:35569807-35578858[-]	9052	_	0.0224635	0.00375927	0.00950223	Genic
105378698	lncRNA	LOC105378698	#N/A	NC_000001.11:46685083-46686666[-]	1584	_	0.0473156	0.0051037	0.0316723	Genic
105378721	lncRNA	LOC105378721	#N/A	NC_000001.11:51793957-51798389[+]	4433	_	0	0.0213154	0.0329261	Genic
102723354	lncRNA	LINC02298	long intergenic non-protein coding RNA 2298	NC_000014.9:105094147-105099496[+]	5350	_	0	0.00365893	0	Intergenic
105379052	lncRNA	LOC105379052	#N/A	NC_000005.10:83011176-83023192[-]	12017	_	0.00501	0.0015173	0.0102943	Intergenic
105379171	lncRNA	LOC105379171	#N/A	NC_000005.10:130337409-130379896[+]	42488	_	0.0185315	0.0056104	0.0359983	Intergenic
105379185	lncRNA	LOC105379185	#N/A	NC_000005.10:134074366-134106445[-]	32080	_	0.0162275	0.00455587	0.0122623	Genic
105379599	lncRNA	LOC105379599	#N/A	NC_000017.11:1095407-1097379[-]	1973	_	0.0119539	0.00607007	0.0117201	Genic
105379695	lncRNA	IER3-AS1	IER3 antisense RNA 1	NC_000006.12:30742963-30743673[+]	711	_	0.0417158	0.0337027	0.0617236	Genic
106144532	lncRNA	ARF4-AS1	ARF4 antisense RNA 1	NC_000003.12:57597789-57600916[+]	3128	_	0.138047	0.0321309	0.0887679	Genic
107984088	lncRNA	LOC107984088	#N/A	NC_000020.11:1863903-1889958[-]	26056	_	0.0346111	0.0132861	0.0273422	Intergenic
107984112	lncRNA	LOC107984112	#N/A	NC_000003.12:8836856-8858840[-]	21985	_	0.00312312	0.00137682	0.00234701	Intergenic
107984113	lncRNA	LOC107984113	#N/A	NC_000004.12:175905387-175964012[-]	58626	_	0.0178228	0.0003896	0.000432477	Genic
107984224	lncRNA	LOC107984224	#N/A	NC_000010.11:37858425-37860666[+]	2242	_	0.0412406	0.00443155	0.00582057	Intergenic
107984243	lncRNA	LOC107984243	#N/A	NC_000010.11:73780628-73782001[-]	1374	_	0.0211651	0.0107461	0.0423855	Intergenic
107984345	lncRNA	LOC107984345	#N/A	NC_000011.10:69134755-69162440[+]	27686	_	0	0.00185693	0.00369425	Genic
107984396	lncRNA	LOC107984396	#N/A	NC_000011.10:118996654-118998030[-]	1377	_	0.0419809	0.00907368	0.00917653	Intergenic
107984403	lncRNA	LOC107984403	#N/A	NC_000011.10:124075598-124076899[+]	1302	_	0.0257042	0.00318055	0.0220539	Intergenic
107984494	lncRNA	LOC107984494	#N/A	NC_000012.12:16420125-16461193[+]	41069	_	0.00171725	0.00458662	0.00158595	Intergenic
107984696	lncRNA	LOC107984696	#N/A	NC_000014.9:98998716-99078042[-]	79327	_	0.011995	0.00269643	0.00386177	Intergenic
107984713	lncRNA	LOC107984713	#N/A	NC_000015.10:71931831-71933647[-]	1817	_	0.0265871	0.0147527	0.0139105	Genic
107984830	lncRNA	LOC107984830	#N/A	NC_000016.10:85300273-85309522[+]	9250	_	0	0.00415318	0.00429112	Genic
107984895	lncRNA	LOC107984895	#N/A	NC_000016.10:3004688-3007388[+]	2701	_	0.0290064	0	0.0101986	Genic
107984917	lncRNA	LOC107984917	#N/A	NC_000001.11:12214240-12227610[+]	13371	_	0.0190841	0.00601615	0.0388388	Genic
107984952	lncRNA	LOC107984952	#N/A	NC_000001.11:44819122-44821994[+]	2873	_	0.0203004	0.0033988	0.0120993	Genic
107984969	lncRNA	LOC107984969	#N/A	NC_000017.11:21214322-21219837[+]	5516	_	0.0279019	0.0073792	0.0247799	Genic
107985054	lncRNA	LOC107985054	#N/A	NC_000001.11:85482285-85491102[-]	8818	_	0.00538663	0.00098175	0.00688995	Genic
107985057	lncRNA	LOC107985057	#N/A	NC_000001.11:85624757-85630978[-]	6222	_	0.0101079	0.00287028	0.00218077	Genic
107985074	lncRNA	LOC107985074	#N/A	NC_000017.11:74531568-74544630[+]	13063	_	0	0	0.00713636	Genic
107985228	lncRNA	LOC107985228	#N/A	NC_000001.11:175866080-175917906[-]	51827	_	0.00877013	0.00093965	0.00139153	Genic
107985295	lncRNA	LOC107985295	#N/A	NC_000019.10:242739-245020[-]	2282	_	0.0348145	0.00500773	0.0127995	Intergenic
107985423	lncRNA	LOC107985423	#N/A	NC_000020.11:653262-658840[+]	5579	_	0.00164	0.000298267	0.0040844	Genic
107985474	lncRNA	LOC107985474	#N/A	NC_000021.9:26458114-26471698[+]	13585	_	0	0	0.0211808	Genic
107985634	lncRNA	LOC107985634	#N/A	NC_000023.11:9407956-9443524[-]	35569	_	0.00775575	0.0002395	0.00280791	Genic
107985688	lncRNA	LOC107985688	#N/A	NC_000023.11:71183382-71198333[-]	14952	_	0.0624118	0.0058515	0.0118729	Intergenic
107985712	lncRNA	LOC107985712	#N/A	NC_000023.11:54635049-54643620[+]	8572	_	0.0367928	0.00466202	0.00721053	Intergenic
107985725	lncRNA	LOC107985725	#N/A	NC_000001.11:245027889-245033464[+]	5576	_	0.00747388	0.00358857	0.0105543	Genic
107985743	lncRNA	LOC107985743	#N/A	NC_000001.11:89743616-89758938[+]	15323	_	0.0345455	0.0144718	0.0214227	Genic
107985785	lncRNA	LOC107985785	#N/A	NC_000002.12:191023140-191025657[-]	2518	_	0.0719227	0.00876393	0.0153165	Genic
107985873	lncRNA	LOC107985873	#N/A	NC_000002.12:42328667-42334034[-]	5368	_	0.0841754	0.00248232	0.0204853	Genic
107985877	lncRNA	LOC107985877	#N/A	NC_000002.12:43232735-43233460[+]	726	_	0.0106931	0.0367571	0.0610375	Genic
107985909	lncRNA	LOC107985909	#N/A	NC_000002.12:87529229-87545468[-]	16240	_	0.00295825	0.00058245	0.000876261	Intergenic
107985942	lncRNA	LOC107985942	#N/A	NC_000002.12:121530332-121533492[+]	3161	_	0.00252262	0.00308455	0.0109993	Genic
107985986	lncRNA	LOC107985986	#N/A	NC_000002.12:218818342-218819144[+]	803	_	0	0.00815515	0.0434907	Intergenic
107986097	lncRNA	LOC107986097	#N/A	NC_000003.12:72738913-72745132[+]	6220	_	0.0216319	0.00191357	0.00337912	Genic
107986110	lncRNA	LOC107986110	#N/A	NC_000003.12:106186832-106189298[-]	2467	_	0.00360875	0.00184627	0.0175224	Intergenic
107986160	lncRNA	LOC107986160	#N/A	NC_000003.12:183283753-183300561[+]	16809	_	0.00152675	0.00109558	0.00780025	Genic
107986249	lncRNA	LOC107986249	#N/A	NC_000004.12:2371477-2374389[-]	2913	_	0.00523762	0.0115004	0.0215206	Genic
107986273	lncRNA	LOC107986273	#N/A	NC_000004.12:40976049-40988398[-]	12350	_	0	0.000615783	0.00563391	Genic
107986347	lncRNA	LOC107986347	#N/A	NC_000005.10:59558557-59561698[-]	3142	_	0.0161379	0.0144425	0.0308668	Genic
107986359	lncRNA	LOC107986359	#N/A	NC_000005.10:80996824-81005406[+]	8583	_	0.0221776	0.0175296	0.0477387	Genic
107986432	lncRNA	LOC107986432	#N/A	NC_000005.10:91135190-91207669[-]	72480	_	0.0345554	0.00382302	0.00942122	Genic
107986495	lncRNA	LOC107986495	#N/A	NC_000005.10:181311034-181313868[+]	2835	_	0.139843	0.0141057	0.0650235	Intergenic
107986517	lncRNA	LOC107986517	#N/A	NC_000006.12:16162789-16163949[+]	1161	_	0.119976	0.00663998	0.0189408	Intergenic
107986763	lncRNA	LOC107986763	#N/A	NC_000007.14:6961845-6987583[-]	25739	_	0.050172	0.0347199	0.0277063	Intergenic
107987001	lncRNA	FAM27E4	#N/A	NC_000009.12:61856090-61904683[+]	48594	_	0	0.0147778	0.0156881	Genic
107987227	lncRNA	LOC107987227	#N/A	NC_000015.10:92277002-92277748[-]	747	_	0.0888391	0.0158413	0.0438458	Intergenic
107987258	lncRNA	LOC107987258	#N/A	NC_000018.10:48636694-48646925[+]	10232	_	0.00840763	0.000566117	0.000895898	Genic
107987261	lncRNA	LOC107987261	#N/A	NC_000018.10:77112346-77117638[+]	5293	_	0.008859	0.00271575	0.0037077	Genic
108783646	lncRNA	DINOL	damage induced long noncoding RNA	NC_000006.12:36677609-36678559[-]	951	_	0.0114245	0.0144594	0.0215842	Genic
109729161	lncRNA	LNCSRLR	lncRNA sorafenib resistance in renal cell carcinoma associated	NC_000003.12:146066344-146069185[-]	2842	_	0.0511514	0.0108509	0.152821	Genic
112267915	lncRNA	LOC112267915	#N/A	NC_000021.9:34880720-34885052[+]	4333	_	0	0.00136557	0.0108514	Genic
112268022	lncRNA	LOC112268022	#N/A	NC_000008.11:10856085-10886141[-]	30057	_	0.00208587	0.000574867	0.00184289	Intergenic
112268089	lncRNA	LOC112268089	#N/A	NC_000012.12:6530172-6534418[-]	4247	_	0.0141341	0.00163963	0.0106783	Genic
112268203	lncRNA	LOC112268203	#N/A	NC_000017.11:45159948-45161571[-]	1624	_	0.166893	0.0352118	0.0547724	Genic
112268252	lncRNA	LOC112268252	#N/A	NC_000019.10:41756768-41761224[-]	4457	_	0.00212525	0.00516233	0.0169498	Genic
112268262	lncRNA	LOC112268262	#N/A	NC_000001.11:50934279-50959742[-]	25464	_	0.0301515	0.0295019	0.0192674	Genic
112268269	lncRNA	LOC112268269	#N/A	NC_000020.11:63863847-63865153[-]	1307	_	0.0670531	0.0230671	0.0440539	Intergenic
112268288	lncRNA	LOC112268288	#N/A	NC_000022.11:46093588-46097919[+]	4332	_	0.0087795	0.00187612	0.00406651	Genic
112268426	lncRNA	LOC112268426	#N/A	NC_000002.12:136088443-136114737[+]	26295	_	0.00616275	0	0.003687	Genic
105378228	lncRNA	LOC105378228	#N/A	NC_000005.10:150985564-151020329[-]	34766	_	0.0122213	0.00787295	0.0171398	Intergenic
102724190	lncRNA	LINC02289	long intergenic non-protein coding RNA 2289	NC_000014.9:77069180-77076191[-]	7012	_	0	0	0.00602188	Intergenic
105371630	lncRNA	LOC105371630	#N/A	NC_000001.11:178125463-178135525[+]	10063	_	0.0261584	0.01292	0.0278394	Genic
283575	lncRNA	LINC02288	long intergenic non-protein coding RNA 2288	NC_000014.9:77041049-77069503[+]	28455	_	0.004391	0.00181293	0.0064756	Intergenic
100750247	lncRNA	HIF1A-AS2	HIF1A antisense RNA 2	NC_000014.9:61747039-61749089[-]	2051	_	0.00813562	0.0114771	0.0114658	Genic
101927044	lncRNA	LOC101927044	#N/A	NC_000018.10:3216246-3246501[+]	30256	_	0.0066875	0.00712812	0.0115491	Genic
107984950	lncRNA	LOC107984950	#N/A	NC_000001.11:44633284-44645482[-]	12199	_	0.00802862	0.00186472	0.0108168	Genic
101929002	lncRNA	LINC02287	long intergenic non-protein coding RNA 2287	NC_000014.9:92905697-92907482[-]	1786	_	0	0.000757217	0.00177152	Intergenic
105376863	lncRNA	LOC105376863	#N/A	NC_000001.11:24010499-24037046[+]	26548	_	0.0253249	0.0606219	0.0367281	Intergenic
440952	lncRNA	EIF1B-AS1	EIF1B antisense RNA 1	NC_000003.12:40173145-40309698[-]	136554	_	0.00870287	0.0113779	0.0125587	Genic
441072	lncRNA	FLJ31104	uncharacterized LOC441072	NC_000005.10:55995167-56003649[+]	8483	_	0.0127846	0.0060442	0.0217147	Intergenic
441172	lncRNA	FLJ46906	uncharacterized LOC441172	NC_000006.12:138691668-138697288[+]	5621	_	0.030388	0.00449025	0.0256695	Genic
100128276	lncRNA	LOC100128276	uncharacterized LOC100128276	NC_000012.12:128849171-128853095[-]	3925	_	0.0634458	0.0298106	0.0881665	Intergenic
100288069	lncRNA	LOC100288069	uncharacterized LOC100288069	NC_000001.11:764865-778688[-]	13824	_	0.0270254	0.0158081	0.0258035	Intergenic
100289061	lncRNA	LOC100289061	#N/A	NC_000001.11:150548564-150556700[-]	8137	_	0.0464194	0	0.0437802	Genic
100505585	lncRNA	LOC100505585	uncharacterized LOC100505585	NC_000019.10:41928820-41930136[+]	1317	_	0.0372428	0.025704	0.0230855	Intergenic
100506637	lncRNA	PRKAR2A-AS1	PRKAR2A antisense RNA 1	NC_000003.12:48847937-48851982[+]	4046	_	0.00551287	0.00070065	0.0062765	Genic
100507099	lncRNA	FRY-AS1	FRY antisense RNA 1	NC_000013.11:32024046-32031639[-]	7594	_	0.00742712	0.00203328	0.00731426	Genic
101929422	lncRNA	LINC02285	long intergenic non-protein coding RNA 2285	NC_000014.9:101120856-101123545[+]	2690	_	0	0	0.000422636	Intergenic
101927275	lncRNA	NDUFV2-AS1	NDUFV2 antisense RNA 1	NC_000018.10:9121265-9136720[-]	15456	_	0.0453021	0.0556355	0.0633308	Genic
101929280	lncRNA	LOC101929280	#N/A	NC_000016.10:594997-597964[+]	2968	_	0.0131963	0.00762882	0.0150588	Genic
101929331	lncRNA	LOC101929331	uncharacterized LOC101929331	NC_000009.12:129282416-129285719[+]	3304	_	0.0271385	0.00561507	0.026954	Intergenic
102724591	lncRNA	LOC102724591	#N/A	NC_000006.12:17585894-17600196[-]	14303	_	0.0132357	0.00417905	0.0113888	Intergenic
102724608	lncRNA	LOC102724608	#N/A	NC_000022.11:50541383-50543005[+]	1623	_	0.0330855	0.0207628	0.0326107	Intergenic
105373511	lncRNA	LOC105373511	#N/A	NC_000002.12:101259882-101266681[-]	6800	_	0.0472871	0.00749312	0.0357098	Genic
105373582	lncRNA	LOC105373582	#N/A	NC_000002.12:120165016-120173756[-]	8741	_	0.00332763	0.000719817	0.0046628	Genic
105375924	lncRNA	LOC105375924	#N/A	NC_000008.11:81153634-81165240[+]	11607	_	0.00829775	0.00517107	0.00876051	Intergenic
105376505	lncRNA	LOC105376505	#N/A	NC_000011.10:330065-333685[+]	3621	_	0.00986375	0.00575667	0.0252255	Intergenic
105377885	lncRNA	LOC105377885	#N/A	NC_000006.12:88299739-88442928[-]	143190	_	0.00695888	0.000783	0.00891093	Intergenic
105377918	lncRNA	LOC105377918	#N/A	NC_000006.12:104462851-104527477[-]	64627	_	0.0209444	0.0037727	0.0119252	Intergenic
107984834	lncRNA	LOC107984834	#N/A	NC_000016.10:30183393-30185202[-]	1810	_	0.0196702	0.00605478	0.0167192	Genic
102723699	lncRNA	LINC02284	#N/A	NC_000014.9:56311017-56345069[+]	34053	_	4.63876	5.30267	6.19027	Intergenic
110806272	lncRNA	BTG3-AS1	BTG3 antisense RNA 1	NC_000021.9:17611686-17614114[+]	2429	_	0.008069	0.0062096	0.00630609	Genic
112268190	lncRNA	LOC112268190	#N/A	NC_000017.11:1007308-1009390[+]	2083	_	0.0137995	0.000739	0.011363	Genic
107985497	lncRNA	LOC107985497	#N/A	NC_000021.9:44948628-44955205[+]	6578	_	0.00281662	0.000319867	0.0026642	Genic
618	lncRNA	BCYRN1	brain cytoplasmic RNA 1	NC_000002.12:47335315-47335514[+]	200	_	0.0113802	0.0132082	0.015932	Genic
3262	lncRNA	HPVC1	human papillomavirus (type 18) E5 central sequence-like 1	NC_000007.14:54201224-54202421[-]	1198	_	0	9.23e-05	0.000274023	Genic
8551	lncRNA	INE2	inactivation escape 2 (non-protein coding)	NC_000023.11:15785716-15787589[-]	1874	_	0	0.00226402	0.000100239	Genic
10737	lncRNA	RFPL3S	RFPL3 antisense	NC_000022.11:32359906-32371264[-]	11359	_	0	0.00260928	0.00401532	Genic
23591	lncRNA	FAM215A	family with sequence similarity 215 member A (non-protein coding)	NC_000017.11:43917208-43917987[+]	780	_	0	0	0.000408511	Genic
25787	lncRNA	DGCR9	DiGeorge syndrome critical region gene 9 (non-protein coding)	NC_000022.11:19017834-19020248[+]	2415	_	0	0.000162367	4.75341e-05	Genic
25859	lncRNA	PART1	prostate androgen-regulated transcript 1 (non-protein coding)	NC_000005.10:60487713-60547657[+]	59945	_	0	0	0.000108545	Genic
26077	lncRNA	DKFZP434H168	uncharacterized LOC26077	NC_000016.10:56192617-56194525[-]	1909	_	0	0.000205417	0	Genic
26102	lncRNA	DKFZP434A062	uncharacterized LOC26102	NC_000009.12:136322302-136327323[-]	5022	_	0	4.17e-05	0.000247477	Intergenic
27004	lncRNA	TCL6	T cell leukemia/lymphoma 6 (non-protein coding)	NC_000014.9:95652097-95673452[+]	21356	_	0.0108945	0.00898552	0.00171107	Genic
27184	lncRNA	DISC2	disrupted in schizophrenia 2 (non-protein coding)	NC_000001.11:231814626-231818517[-]	3892	_	0	3.555e-05	0	Genic
27321	lncRNA	TNRC17	trinucleotide repeat containing 17	NC_000002.12:235513740-235517921[-]	4182	_	0	0.00011705	3.14773e-05	Genic
101929634	lncRNA	LINC02280	long intergenic non-protein coding RNA 2280	NC_000014.9:104661120-104665558[-]	4439	_	0.129365	0.13922	0.119026	Intergenic
51198	lncRNA	CDKN2A-AS1	CDKN2A antisense RNA 1 (head to head)	NC_000009.12:21967139-21967754[+]	616	_	0	0.00639308	0	Genic
53844	lncRNA	COPG2IT1	COPG2 imprinted transcript 1 (non-protein coding)	NC_000007.14:130543453-130546900[+]	3448	_	0.00685375	0.000868817	0.000694341	Genic
100506085	lncRNA	LINC02275	long intergenic non-protein coding RNA 2275	NC_000004.12:169917761-169975902[-]	58142	_	0.00626112	0.000447233	0.00105525	Intergenic
54147	lncRNA	BACH1-IT3	BACH1 intronic transcript 3	NC_000021.9:29496047-29500386[+]	4340	_	0	0	0.00276709	Genic
54435	lncRNA	HCG4	HLA complex group 4 (non-protein coding)	NC_000006.12:29791031-29793073[-]	2043	_	0	0.00201837	0.00141472	Genic
54508	lncRNA	EPB41L4A-AS2	EPB41L4A antisense RNA 2 (head to head)	NC_000005.10:112419583-112420978[+]	1396	_	0	0.00114468	0	Genic
55384	lncRNA	MEG3	maternally expressed 3 (non-protein coding)	NC_000014.9:100826108-100861026[+]	34919	_	0.00986588	0.0010444	0.00144887	Genic
100996286	lncRNA	LINC02273	long intergenic non-protein coding RNA 2273	NC_000004.12:152100753-152104720[+]	3968	_	0.0473778	0.00504555	0.000284591	Intergenic
55472	lncRNA	RBM12B-AS1	RBM12B antisense RNA 1	NC_000008.11:93740111-93740819[+]	709	_	0	0.0007338	0.00829786	Genic
55853	lncRNA	IDI2-AS1	IDI2 antisense RNA 1	NC_000010.11:1022637-1044201[+]	21565	_	0	0	0.000775466	Genic
105377338	lncRNA	LINC02267	long intergenic non-protein coding RNA 2267	NC_000004.12:96310703-96818415[+]	507713	_	0	0.00384987	0.0152139	Intergenic
57000	lncRNA	GSN-AS1	GSN antisense RNA 1	NC_000009.12:121280768-121285530[-]	4763	_	0.00173537	0.000853267	0.00357378	Genic
339978	lncRNA	LINC02260	long intergenic non-protein coding RNA 2260	NC_000004.12:54603211-54607131[-]	3921	_	0	0	0.000414716	Intergenic
100996255	lncRNA	LINC02256	long intergenic non-protein coding RNA 2256	NC_000015.10:32536759-32580609[+]	43851	_	0.0988294	0.109905	0.168515	Intergenic
65072	lncRNA	CFLAR-AS1	CFLAR antisense RNA 1	NC_000002.12:201140289-201157792[-]	17504	_	0	5.8e-05	0.00275919	Genic
78998	lncRNA	RHPN1-AS1	RHPN1 antisense RNA 1 (head to head)	NC_000008.11:143366623-143368635[-]	2013	_	0	3.41e-05	0.0051643	Genic
107987295	lncRNA	LINC02246	long intergenic non-protein coding RNA 2246	NC_000021.9:14816838-14918668[-]	101831	_	0.606218	0.500011	0.978753	Intergenic
79150	lncRNA	MGC4859	uncharacterized LOC79150	NC_000007.14:10449820-10779944[-]	330125	_	0	0	0.001361	Genic
400958	lncRNA	LINC02245	long intergenic non-protein coding RNA 2245	NC_000002.12:64901840-64932447[-]	30608	_	0.00389513	0.000987183	0	Intergenic
80868	lncRNA	HCG4B	HLA complex group 4B (non-protein coding)	NC_000006.12:29924592-29927215[-]	2624	_	0.00650463	0.0044925	0.00408462	Genic
81854	lncRNA	ZNF205-AS1	ZNF205 antisense RNA 1	NC_000016.10:3110460-3115598[-]	5139	_	0	0.0018829	0.00163734	Genic
84214	lncRNA	LOC84214	#N/A	NC_000007.14:65839707-65842398[+]	2692	_	0.00558938	0.00557625	0.00352536	Intergenic
401134	lncRNA	LINC02232	long intergenic non-protein coding RNA 2232	NC_000004.12:64914281-65004500[-]	90220	_	0	0.00180203	0	Intergenic
102723839	lncRNA	LINC02224	long intergenic non-protein coding RNA 2224	NC_000005.10:44495144-44510282[-]	15139	_	0.211104	0.231521	0.166279	Intergenic
[truncated: 2,326 more rows]
